# Supplementary material for: Examining word association networks: A cross-country comparison of women’s perceptions of HPV testing and vaccination
Source: PLoS One. 2017 Oct 5;12(10):e0185669. doi: 10.1371/journal.pone.0185669 (PMC5628849; doi:10.1371/journal.pone.0185669)
Supplement: S2 File — The data file (.xlsx) with the survey responses and metadata. (XLSX) [file pone.0185669.s002.xlsx]

## Sheet: CompletedResponses
Age	Gender	Country	Pref	STD		Household Income	Region	Device Types		HPV Vaccination				Cervical Cancer Vaccination				HPV Test				Pap smear				New Pap smear
30-44	Female	AUS	HPV test	Yes		180,000 or more	Victoria	Windows Desktop / Laptop		unsure	girls	school		unsure	good	questions		accurate	different	gentle		2 years	letter	normal		similar	reliable	2 years
30-44	Female	AUS	New Pap smear	Yes		Prefer not to answer	New South Wales	Windows Desktop / Laptop		risky	teenager	reaction		unknown	HPV	risk		transmitted	injection	contagious		easy	painfree	quick		thorough	quick	expensive
18-29	Female	AUS	New Pap smear	Yes		60,000 to 89,999	Queensland	Windows Desktop / Laptop		Important	Unisex	School		Needle	Needed	Prevent		Unsure	New	Unknown		Ouch	Speculum	Cancer		Ouch	Speculum	Cancer
30-44	Female	AUS	HPV test	No		30,000 to 59,999	Victoria	Windows Desktop / Laptop		what?	how?	who?		what	how	age		what	when	how		uncomfortable	necessary	important		uncomfortable	what?	why?
18-29	Female	AUS	HPV test	No		30,000 to 59,999	South Australia	Windows Desktop / Laptop		Confused	Unsure	Worried		Four	Pain	Burning		AIDS?	Confused	Monkeys		uncomfortable	duck	cold		confusing	better	new
45-59	Female	AUS	HPV test	Yes		60,000 to 89,999	Victoria	Android Phone / Tablet		Good	Safe	Advisable		Hope	Money	Important		Warts	Std	Check		Important	Relevant	Uncomfortable		Better	Clearer	Accurate
18-29	Female	AUS	New Pap smear	No		30,000 to 59,999	Victoria	Windows Desktop / Laptop		unknown	uneducated	unaware		should	get	this		what	on	earth		Overdue	uncomfortable	procrastinate		unfamiliar	complicated	change
30-44	Female	AUS	New Pap smear	No		90,000 to 119,999	New South Wales	Windows Desktop / Laptop		vaccine	exam	doctors		vaccine	screening	exam		screening	tests	vaccine		screening	smear	tests		screening	examination	doctors
18-29	Female	AUS	New Pap smear	No		30,000 to 59,999	Western Australia	Windows Desktop / Laptop		h	P	V		C	V	C		human	papilloma	test		P	A	P		new	pap	smear
30-44	Female	AUS	HPV test	No		150,000 to 179,999	Queensland	Windows Desktop / Laptop		fine	beneficial	positive		good	done	positive		unknown	why	vaccination		intrusive	avoid	nessesary		unknown	information	consider
30-44	Female	AUS	New Pap smear	No		180,000 or more	Australian Capital Territory	Windows Desktop / Laptop		same	as	before		easier	but	hurts		same	as	before		gross	annoying	uncomfortable		Dont	really	know
45-59	Female	AUS	New Pap smear	Yes		0 to 29,999	Queensland	iOS Phone / Tablet		Needle	Easy	Relief		Needle	Prevention	Easy		Pap smear	Annoying	Great		Hate	Dread	Annoying		Pap test	Doctor	Annoying
30-44	Female	AUS	New Pap smear	No		150,000 to 179,999	Queensland	iOS Phone / Tablet		Needle	Doctor	Virus		Needle	Doctor	Yuck		Pap smear	Embarassment	Doctoe		Doctor	Embarassment	Yuck		Unknown	Doctor	Test
18-29	Female	AUS	New Pap smear	No		Prefer not to answer	New South Wales	Windows Desktop / Laptop		needle	cost	regular		needle	precaution	uncertain		unsure	unfamiliar	never had		precaution	uncomfortable	required		results	longer	regular
18-29	Female	AUS	New Pap smear	No		90,000 to 119,999	Victoria	Windows Desktop / Laptop		painful	immunisation	smart		painful	fever	needle		uncomfortable	painful	blood		uncomfortable	cancer	safe		new	better	technology
18-29	Female	AUS	HPV test	No		180,000 or more	Tasmania	iOS Phone / Tablet		Wee	Beauty	Boats		Poo	Wee	Poo		Smelly pants	Fruit	Poo		Books	Fan	Dresses		Poo	Wee	Poowee
30-44	Female	AUS	New Pap smear	Yes		30,000 to 59,999	Western Australia	Windows Desktop / Laptop		Cervex	Necessary	Beneficial		Prevention	Cost	Side effects		STD	Necessary	Prevention		Annoying	Necessary	Effective		Cost	Efficiacy	Good
45-59	Female	AUS	New Pap smear	No		120,000 to 149,999	Victoria	Windows Desktop / Laptop		teenagers	girls	prevention		teenage girls	prevention	school run		pap smear	girls	disease		private doctor	older women	uncomfortable		dont know	sounds better	advanced
45-59	Female	AUS	New Pap smear	No		90,000 to 119,999	Victoria	Windows Desktop / Laptop		acronym	unknown	medical		prevention	female	needle		prevention	cost	medical		GP	time	cost		prevention	medical	new
30-44	Female	AUS	HPV test	Yes		90,000 to 119,999	Western Australia	Windows Desktop / Laptop		unknown	doctors	positive		injection	too late	painful		unknown	doctors	positive		Doctor	uncomfortable	necessary		unknown	positive	doctors
30-44	Female	AUS	New Pap smear	No		180,000 or more	New South Wales	iOS Phone / Tablet		Lifesaver	Inoculation	Protection		Clinical	Does what it says on the box	Lifesaver		Clinical	Confusing (could be HIV)	Ouch		Gross	Necessary evil	Two second minor inconvenience		Medical	Gross	Not new
60+	Female	AUS	New Pap smear	No		Prefer not to answer	Queensland	Windows Desktop / Laptop		cancer	doctor	female		life	important	female		cancer	spread	treatment		embarrassing	pain	vulnerable		embarrassing	pain	vulnerable
45-59	Female	AUS	New Pap smear	No		Prefer not to answer	Victoria	iOS Phone / Tablet		Not sure	Too old to get vaccination	Would get one if provide		Does it exist?	Not sure if it will stop cancer if available	Side effects		Peace of mind	Detection	Continuous checking		Preventable	Early detection	Curable		Innovative	More accurate	Trust
30-44	Female	AUS	New Pap smear	No		Prefer not to answer	South Australia	iOS Phone / Tablet		Cervical	Cancer	Needle		Cervical	Cancer	Needle		Human	Cervical	Cancer		Time	For	Doctor visit		Up	Gradeed	Testing
45-59	Female	AUS	New Pap smear	No		120,000 to 149,999	Tasmania	iOS Phone / Tablet		Protection	Healthcare	Injection		Screening	Protection	Women		Screening	Answers	Counselling		Screening	Research	Testing		Women	Healthcare	Screening
30-44	Female	AUS	New Pap smear	No		60,000 to 89,999	Queensland	MacOS Desktop / Laptop		injection	immunity	virus		cancer	fear	immunity		assessment	positive	negative		speculum	uncomfortable	female		new	better	reliable
45-59	Female	AUS	New Pap smear	Yes		180,000 or more	New South Wales	Windows Desktop / Laptop		yuk	horrible	blood		quick	hurt	pain		never	needles	pain		time	embarassing	hurt		quick	uncomfortable	efficient
18-29	Female	AUS	New Pap smear	Yes		Prefer not to answer	Australian Capital Territory	Windows Desktop / Laptop		awesome	get it	now		awesome	everyone	important		good	discomfort	prevention		uncomfortable	hate	prevention		yes	pain	discomfort
30-44	Female	AUS	New Pap smear	No		60,000 to 89,999	Western Australia	Windows Desktop / Laptop		H	P	V		C	C	V		H	P	V		Pap	Smear	Doctorr		N	P	S
18-29	Female	AUS	New Pap smear	No		30,000 to 59,999	Queensland	Windows Desktop / Laptop		human	pap	virus		cervix	cancer	vaccine		human	papilloma	virus		pap	smear	again		new	pap	smear
18-29	Female	AUS	New Pap smear	Yes		30,000 to 59,999	South Australia	Windows Desktop / Laptop		vaccination	blood	injection		vaccination	cancer	prevention		cells	disease	transmitted		cells	discomfort	doctor		cells	doctor	new
18-29	Female	AUS	New Pap smear	No		60,000 to 89,999	New South Wales	iOS Phone / Tablet		Vaccine	Prevent	Needle		Curable	Vaccine	Preventable		Unknown	Examination	Doctor		Older women	Cancer	Uncomfortable		Better	New technology	Advanced
30-44	Female	AUS	HPV test	Yes		0 to 29,999	Victoria	Windows Desktop / Laptop		Preventative	Medical	Helping		Important	Needed	Valuable		Important	Necessary	Easy		Horrible	Invasive	Cold		Scary	Unnecessary	Curious
18-29	Female	AUS	New Pap smear	No		0 to 29,999	Victoria	Android Phone / Tablet		Needles	Unknown	Confused		Needles	Pregnancy	Uterus		Unknown	Disease	Papadams		Gynaecologist	Speculum	Duck		Quick	Speculum	Disease
18-29	Female	AUS	New Pap smear	Yes		30,000 to 59,999	Victoria	MacOS Desktop / Laptop		Technology	Prevention	Medicine		Worthwhile	Thankful	Technology		Vaccine	Treatable	Worthwhile		Awkward	Uncomfortable	Necessary		Necessary	Awkward	Peace-of-mind
30-44	Female	AUS	New Pap smear	No		30,000 to 59,999	Victoria	iOS Phone / Tablet		Needles	Pain	Doctor		Redness	Needle	Pain		Pap smear	Cancer	Vagina		Doctors	Examination	Uncomfortable		Tests	Prevention	Technology
30-44	Female	AUS	HPV test	No		Prefer not to answer	New South Wales	Windows Desktop / Laptop		worthwhile	available?	method?		progressive	unknown	method		tested	useful	invasive		painful	invasive	inconclusive		progress	invasive	preventative
18-29	Female	AUS	New Pap smear	No		60,000 to 89,999	Victoria	Windows Desktop / Laptop		unsure	dont know	cant say		dont know	unsure	cant say		dont know	cant say	unsure		dont know	unsure	cant say		unsure	cant say	dont know
45-59	Female	AUS	New Pap smear	No		60,000 to 89,999	Western Australia	Windows Desktop / Laptop		cure	prevention	cancer		cancer	prevention	interjection		cancer	prevention	intervention		prevention	detection	vaginal		cancer	cervical	intervention
30-44	Female	AUS	New Pap smear	No		120,000 to 149,999	Victoria	iOS Phone / Tablet		Good	New	Helpful		Prevention	Good	New		Confusing	Similar	Same		Annoying	Invasive	Necessary		Confusing	Similar	Regular
18-29	Female	USA	New Pap smear	No		25,000 to 49,999	Middle Atlantic	iOS Phone / Tablet		Common	Useful	Publicized		Really?	Not sure	Unpublicized		Careful	Prevalent	A must		Uncomfortable	Scary	Awkward		Interesting	Useful	Predetermining
60+	Female	USA	New Pap smear	No		50,000 to 74,999	East North Central	Windows Desktop / Laptop		women	CANCER	DETECTS		PREVENTS	CANCER	OCCURENCE		DETECTS	PRE-CANCER	WOMEN		YEARLY	EXAM	CANCER		SIMILAR	CANCER	DETECTION
18-29	Female	USA	New Pap smear	Yes		50,000 to 74,999	South Atlantic	iOS Phone / Tablet		Helpful	Necessary	Good		Helpful	Easy	Thankful		STD	Common	Curable		Painful	Gross	Necessary		Precancerous	Helpful	Screening
60+	Female	USA	HPV test	No		10,000 to 24,999	West North Central	Windows Desktop / Laptop		needles	rashes	doctor		what	I wish	nice		Aids	stds	HIV		gross	disgusting	embarrasing		charlie	embarassing	private
18-29	Female	USA	New Pap smear	Yes		25,000 to 49,999	West South Central	MacOS Desktop / Laptop		prevention	of	virus		uterus	death	prevention		same	as	new pap		current	test	used		same	as	hpv test
45-59	Female	USA	New Pap smear	No		75,000 to 99,999	Mountain	Windows Desktop / Laptop		preventative	men	women		preventative	men	women		cancerous	screening	new		stick	swab	screening		better	cancerous	screening
45-59	Female	USA	New Pap smear	Yes		25,000 to 49,999	South Atlantic	Windows Desktop / Laptop		unnecessary	painful	embarassing		painful	expensive	doubful		embarassing	expensive	awkward		unpleasant	painful	awkward		curiousity	invasive	awkward
30-44	Female	AUS	New Pap smear	No		30,000 to 59,999	Victoria	Windows Desktop / Laptop		whats this?	what	do i do		?	?	?		what am	i	meant to do here?		what am i meant to write/.	i have no idea	?		?	?	?
60+	Female	USA	New Pap smear	No		50,000 to 74,999	West North Central	Windows Desktop / Laptop		sore	short	long		shot	oral	years		early	still	prevent		short	long	sore		prevent	still	early
30-44	Female	USA	New Pap smear	No		50,000 to 74,999	Mountain	Android Phone / Tablet		Beneficial	Preventative	Necessary		Hpv	Needed	Preventative		Pain	New	Preventative		Pain	Necessary	Uncomfortable		Preventative	Pain	New
45-59	Female	USA	New Pap smear	Yes		50,000 to 74,999	South Atlantic	Android Phone / Tablet		Haven't	Had	One		Don't	Have	One		Need	One	Now		Dislike	Necessary	Important		Need	One	Now
45-59	Female	AUS	New Pap smear	No		90,000 to 119,999	Queensland	Windows Desktop / Laptop		necessary	harmless	targeted		wonderful	untested	hopeful		useful	necessary	uncomfortable		uncomfortable	necessary	regular		useful	development	reliable
30-44	Female	USA	New Pap smear	Yes		75,000 to 99,999	Pacific	iOS Phone / Tablet		Prevention	Hurts	Nine		Hpv	Hurts	Gardasil		Std	Cancer	Wart		Uncomfortable	Screening	Necessity		Pelvic	Screen	Uncomfortable
45-59	Female	USA	New Pap smear	No		Prefer not to answer	Mountain	iOS Phone / Tablet		Sex	Prevention	Health		Health	Prevention	Uterus		Sex	Unprotected	Cervix		Cold	Uncomfortable	Metal		Cold	Uncomfortable	Metal
45-59	Female	AUS	HPV test	No		Prefer not to answer	Western Australia	Windows Desktop / Laptop		cancer	prevention	smear		cancer	prevention	smear		Pap Smear	Overdue	Cancer		cancer	prevention	smear		Pap smear	overdue	cancer
30-44	Female	AUS	HPV test	No		90,000 to 119,999	New South Wales	iOS Phone / Tablet		Healthy	Preventative	Needle		Needle	Beneficial	Female		New	Unknown	Helpful		Annoying	Embarrassing	Painful		Beneficial	Embarrassing	Female
60+	Female	AUS	HPV test	No		Prefer not to answer	Queensland	MacOS Desktop / Laptop		youth	Fraser	Australia		Youth	Frazer	australia		new	information	research		painful	difficult	unreliable		information	research	uninformed
30-44	Female	AUS	HPV test	No		60,000 to 89,999	South Australia	iOS Phone / Tablet		Prevention	Teenagers	Girls		Prevention	Teenagers	Girls		Cervical cancer	Prevention	Testing		Woman	uncomfortable	Annually		Woman	Unconfortable	Requirement
45-59	Female	USA	New Pap smear	No		Prefer not to answer	Middle Atlantic	Windows Desktop / Laptop		Prevention	Health	Positive		Prevention	Health	Important		Prevention	Important	Women		Important	Prevention	Health		Important	Health	Prevention
45-59	Female	AUS	New Pap smear	Yes		30,000 to 59,999	South Australia	Windows Desktop / Laptop		prevention	disease	health		prevention	children	women		scary	unhealthy	doctors		doctor	health	prevention		painful	necessary	unavoidable
18-29	Female	AUS	New Pap smear	No		30,000 to 59,999	Western Australia	Windows Desktop / Laptop		1	1	1		1	2	3		1	2	3		1	2	3		1	1	1
45-59	Female	USA	New Pap smear	No		150,000 to 174,999	South Atlantic	iOS Phone / Tablet		Early	Prevents	Antibodies		Protection	Painless	Good		Detection	Positive	Painless		Embarrassing	Painful	Awkward		Awkward	Embarrassing	Painful
60+	Female	USA	HPV test	No		10,000 to 24,999	South Atlantic	Android Phone / Tablet		cancer	earlier	prevention		questionable	uneducated	prevention		na	na	na		yearly	cancer	detection		better	yearly	detection
30-44	Female	AUS	HPV test	No		60,000 to 89,999	New South Wales	Windows Desktop / Laptop		Needle	None intrusive	One off		Young	Needed	Help		Needed	life saving	Women		Embarrassing	Uncomfortable	Messy		Bi-yearly	embarrassing	uncomfortable
45-59	Female	USA	HPV test	Yes		0 to 9,999	West North Central	Android Phone / Tablet		causcious	alert	schedule		every 6 months	yearly	Talk to Dr.		New break thru	stay updated	be aware of different changes in ur body		check up	discharge	unusual		New disvovery	Keep appointments	tell someone that dont know
18-29	Female	AUS	New Pap smear	No		30,000 to 59,999	Queensland	Windows Desktop / Laptop		easy	quick	painful		easy	quick	95%		.	.	.		quick	bareable	easy		unsure	unsure	unsure
60+	Female	USA	New Pap smear	No		50,000 to 74,999	Middle Atlantic	Windows Desktop / Laptop		precaution	prevention	risky		precaution	prevention	efficient		better	precancerous	early		detection	cancer	yearly		better	precancerous	early
60+	Female	USA	New Pap smear	Yes		100,000 to 124,999	West South Central	iOS Phone / Tablet		Help	Prevent	Cancer		Human	Papilloma	Virus		Sex	Cervical	Cancer		Cancer	Detection	Trst		Better	Early	Detection
45-59	Female	AUS	HPV test	Yes		60,000 to 89,999	Victoria	Windows Desktop / Laptop		great discovery	preventative	available		beneficial	necessary	prevention		nasty	contagious	avoidablr		uncomfortable	necessary	annual		great	necessary	helpful
45-59	Female	AUS	New Pap smear	Yes		120,000 to 149,999	Northern Territory	Windows Desktop / Laptop		dangerous	untested	unnecessary		dangerous	untested	unnecessary		herpes	genital	sore		cold	hurts	uncomfortable		effective	hurts	cold
45-59	Female	USA	New Pap smear	Yes		100,000 to 124,999	Mountain	iOS Phone / Tablet		Risky	unproven	Damaging		Unproven	Junk science	Financial		Painful	Life saving	Scary		Annoying	Necessary	Healthy		Unstudied	Gimmicky	Financial kickbacks
45-59	Female	AUS	New Pap smear	No		60,000 to 89,999	Northern Territory	Windows Desktop / Laptop		safe	effective	teenagers		HPV	3 needles	school age		blood test	wart	sexually transmitted		cervix	speculum	slide		safe	effective	proven
45-59	Female	USA	New Pap smear	No		10,000 to 24,999	West South Central	iOS Phone / Tablet		Early	Prevention	Vaccination		Human	Papiloma	Virus		Vaginal	Warts	Diagnosis		Vaginal	Precancerous	Test		Vaginal	Baseline	Test
45-59	Female	AUS	HPV test	Yes		0 to 29,999	Victoria	iOS Phone / Tablet		Cancer	Prevention	Test		Prevention	Cancer	Jab		Test	Disease	Human		Cervix	Precaution	Vagina		Advance	Safe	Accurate
18-29	Female	AUS	New Pap smear	Yes		90,000 to 119,999	South Australia	Windows Desktop / Laptop		important	unknown	good		essential	important	good		important	good	necesary		essential	good	necessary		same	essential	good
60+	Female	USA	HPV test	No		75,000 to 99,999	Middle Atlantic	Windows Desktop / Laptop		test	safety	precauction		cancer	safety	precauction		cancer	disease	safety		exam	cancer	safety		cancer	precauction	safety
45-59	Female	AUS	New Pap smear	No		Prefer not to answer	New South Wales	Windows Desktop / Laptop		Safe	Tested	Preventative		Unknown long term	Preventative	Necessay		Unknown long term	Preventative	Safe short term		Uncomfortable	Painful	Necessary		Need more details	Unknown	Long term impact
45-59	Female	AUS	New Pap smear	No		120,000 to 149,999	Queensland	Windows Desktop / Laptop		blank	blank	blank		young	great	wish we had it		No sure	unknown	discussion		cold	2years	dreaded		Unheard of	progression	advertised
45-59	Female	AUS	HPV test	No		Prefer not to answer	Victoria	iOS Phone / Tablet		Useful	Proactive	Cost		Prevention	Essential	Proactive		Proactive	Innovative	Examination		Necessary	Uncomfortable	Healthy		Essential	Proactive	Intelligent
30-44	Female	AUS	New Pap smear	No		Prefer not to answer	Western Australia	Windows Desktop / Laptop		necessary	availability	cost		plausible	handy	cost		vital	infection	cancer		vital	uncomfortable	questionable		necessary	vital	cancer
18-29	Female	AUS	HPV test	No		Prefer not to answer	Queensland	Windows Desktop / Laptop		cleaner	needle	injection		useful	helpful	defense		new	what	maybe		older	invasive	uncomfortable		horrible	disturbing	invasive
45-59	Female	AUS	New Pap smear	No		Prefer not to answer	Western Australia	Windows Desktop / Laptop		scarely	not sure what is in the drug	injection		drug	injection	not sure		drug	injection	still have to do normal pap smear		normal	previously done	still have to deal with is regardless		no diferrence with pap smear	no drug	still have to do pap smear
45-59	Female	USA	HPV test	No		10,000 to 24,999	Mountain	MacOS Desktop / Laptop		pap	smear	pap		pap	smear	pap		pap	smear	pap		pap	smear	pap		pap	smear	pap
30-44	Female	USA	New Pap smear	Yes		25,000 to 49,999	Pacific	Windows Desktop / Laptop		Prevention	young	controversal		Same	As	HPV		STD	Hepetius	C		uncomfortable	yearly	test		still	unconfortable	results
30-44	Female	USA	HPV test	No		Prefer not to answer	Pacific	MacOS Desktop / Laptop		helpful	necessary	important		helpful	necessary	important		helpful	necessary	important		helpful	necessary	important		helpful	necessary	important
60+	Female	USA	HPV test	Yes		50,000 to 74,999	West South Central	iOS Phone / Tablet		Needed	Education	Progress		Cure	Treatment	Prevention		Convenient	Healthy	Knowledge		Invasive	Diagnose	Age		Advanced	Technology	Treatment
45-59	Female	AUS	HPV test	Yes		Prefer not to answer	New South Wales	Windows Desktop / Laptop		quick	longterm	easy		shot	arm	available?		doctor	disease	result		doctor	test	annual		cancer	test	new
45-59	Female	USA	New Pap smear	No		50,000 to 74,999	West South Central	Windows Desktop / Laptop		three	shots	painful		painful	quick	ok		painful	repeating	outcome		painful	invasive	embarrassing		cervix	invasive	undesirable
18-29	Female	USA	HPV test	No		25,000 to 49,999	East North Central	Android Phone / Tablet		STI	Important	Shot		Really possible?	Doubt it will work	Seems kind of extreme		STI	Low income	No Protection		Papa	Smear mud or blood	Pain		Probably less effective	Easier	Cheaper
30-44	Female	AUS	New Pap smear	No		60,000 to 89,999	Western Australia	Windows Desktop / Laptop		mystery	unknown	unsure		needle	arm	pain		unknown	unsure	clueless		vagina	forceps	gloves		vagina	gloves	forceps
18-29	Female	USA	New Pap smear	Yes		50,000 to 74,999	New England	MacOS Desktop / Laptop		preventative	diagnostic	good		preventative	cancer	good		preventative	diagnostic	good		stick	doctor	preventative		preventative	stick	diagnostic
30-44	Female	USA	New Pap smear	No		75,000 to 99,999	West North Central	Android Phone / Tablet		shot	clean	save		shot	ouch	helpful		um	what	yuck		uncomfortable	nessesary	doctor		uncomfortable	doctor	better
45-59	Female	USA	HPV test	No		100,000 to 124,999	Pacific	iOS Phone / Tablet		Protection	Shot	Sed		Test	Injection	Innoculate		Blood	Wart	Immune		Swab	Scrape	Stirrups		Effective	Advanced	Same
45-59	Female	USA	New Pap smear	Yes		0 to 9,999	Mountain	Android Phone / Tablet		Cervix cancer	Ovarian cancer	Uterus cancer		Cervix	Ovaries	Uterus		Cervix cancer	Uterus cancer	Ovarian cancer		Vagina	Uterus	Cervix		Cervix	Ovaries	Sexual transmitted diseases
18-29	Female	AUS	HPV test	No		Prefer not to answer	Victoria	Android Phone / Tablet		Doctor	Prevention	Cancer		Prevention	Necessary	Women		Doctor	Scary	Results		Swab	Doctor	Uncomfortable		Doctor	Once every 2 years	Female
45-59	Female	USA	New Pap smear	No		10,000 to 24,999	Pacific	Android Phone / Tablet		Genital warts	Preventitive	Good thing		Dont know what it is	Unsure	Will do ut		Genital	Warts	Std		Necesssary	Can find cancer	Dont like		Unsure	Dont know what it is	Dont like
30-44	Female	USA	New Pap smear	Yes		25,000 to 49,999	Pacific	Android Phone / Tablet		Teens	Sexually active	Cervical cancer		Preventive	Expensive	Rare		Teens	Promiscuous	Std's		Yearly	Scraping	Std's		Expanding	Expensive	Rare
45-59	Female	USA	New Pap smear	Yes		200,000 and up	West South Central	iOS Phone / Tablet		Series	Of	Three		Never	Heard	Of		Common	Std	Cancer		Necessary	Evil	Yuck		Smear	Stirrups	Pap
45-59	Female	USA	New Pap smear	Yes		Prefer not to answer	West South Central	iOS Phone / Tablet		Preventative	Ouch	Necessary		Scary	Helpful	Grateful		Disease	Painful	Dirty		Nervous	Uncomfortable	Relieved		Interesting	Uneducated	Nervous
45-59	Female	AUS	HPV test	No		90,000 to 119,999	Queensland	Windows Desktop / Laptop		unnecessary	vaccination sideeffects	dubious benefit		unnecessary	unresearched sideeffects	dubious benefit/efficacy		need more info	need more info	need more info		uncomfortable	necessary	preventative		need more information	need more information	need more information
45-59	Female	AUS	New Pap smear	Yes		150,000 to 179,999	Victoria	iOS Phone / Tablet		Uncomfortable	Necessary	Good		Uncomfortable	Necessary	Good		Necessary	Routine	Embarassing		Necessary	Embarassing	Routine		Necessary	Embarassing	Routine
30-44	Female	USA	New Pap smear	Yes		50,000 to 74,999	West North Central	Windows Desktop / Laptop		necessary	good	weirdly political		HPV vaccine	necessary	useful		unsure	what?	never heard of this		painful	necessary	uncomfortable		updated	still painful	necessary
30-44	Female	AUS	New Pap smear	No		60,000 to 89,999	Victoria	Windows Desktop / Laptop		yes	no	maybe		what	was	question		i	dont	know		a	b	c		still	dont	know
18-29	Female	AUS	New Pap smear	No		60,000 to 89,999	South Australia	Android Phone / Tablet		Three	Wart	Australia		Hpv	Three	Papiloma		New	Smear	Wart		Yearly	Female	Cervical		Yearly	Women	New
30-44	Female	AUS	New Pap smear	No		30,000 to 59,999	New South Wales	iOS Phone / Tablet		Is it safe	Is it effective	Well researchef		Safety	Effective	Necessary		Is it safe	Is it effective	Insure		Convenient	Necessary	Effective		More information	Effective	Research
30-44	Female	USA	New Pap smear	No		Prefer not to answer	West North Central	Windows Desktop / Laptop		unknown	necessary	helpful		unknown	necessary	helpful		unknown	new	why		necessary	annual	uncomfortable		unusual	better	annual
30-44	Female	USA	New Pap smear	No		50,000 to 74,999	Pacific	Windows Desktop / Laptop		I	don't	know		painful	unknown	ouch		yearly	everyone	easy		uncomfortable	cold	slimy		unknown	different	uncomfortable
60+	Female	USA	New Pap smear	No		25,000 to 49,999	Pacific	Windows Desktop / Laptop		hurt	helpful	side effects		helpful	healthy	good		new	good	healthy		gyn	embarassing	not fun		blah	blah	blah
45-59	Female	AUS	New Pap smear	No		30,000 to 59,999	Victoria	Windows Desktop / Laptop		herpes	prevention	test		new	needle	prevention		virus	cancer	test		cancer	prevention	test		new	reliable	test
18-29	Female	AUS	HPV test	No		Prefer not to answer	Victoria	Windows Desktop / Laptop		worthless	needle	young		hurt	needle	nonacurate		same	as	pap		uncomfortable	quick	nervous		same	as	other
60+	Female	USA	New Pap smear	Yes		100,000 to 124,999	Mountain	iOS Phone / Tablet		Wonderful	Needed	Should be required		A godsend	Essential	Needed by all		Great	Needed	Informative		Standard	Time tested	Moist		Improved	Reliable	Great
18-29	Female	AUS	New Pap smear	No		Prefer not to answer	South Australia	Android Phone / Tablet		school	preventative	for males too		HPV vax	preventative	noninvasive		simple	inexpensive	painless		preventative	useful	painless		preventative	painless	frequent
30-44	Female	AUS	New Pap smear	Yes		30,000 to 59,999	Victoria	Android Phone / Tablet		needles	warts	doctor		sickness	dying	women		warts	cervical cancer	study		pain	vagina	speculum		fresh	innovative	cells
45-59	Female	USA	New Pap smear	No		150,000 to 174,999	South Atlantic	Windows Desktop / Laptop		I	don't	know		I	don't	know		Test	For	Virus		Test	for	cancer		I	don't	know
18-29	Female	USA	New Pap smear	No		25,000 to 49,999	Pacific	iOS Phone / Tablet		Incomplete	Vaccination	No thanks		Does it work ?	Yuck a shot	Need more information		Ugh	Doctor appointment	Ugh		Ugh	Doctor appointment	Not fun		Ugh	Doctor appointment	Fun
30-44	Female	AUS	New Pap smear	No		60,000 to 89,999	Queensland	MacOS Desktop / Laptop		young woman	age limit	too old		I'm too old so what use is it to me?	For young girls only	Efficacy unknown		Never heard of it	What use is it if I cannot get vaccinated because I'm too old	Unprotected sex		Annoying	I'm on the government register and they send harassing letters until I get one	When I had one in the private sector, they didn't notice		Never heard of it	Never heard of it	Never heard of it
30-44	Female	AUS	HPV test	No		Prefer not to answer	Victoria	Windows Desktop / Laptop		unknown	what is it?	doctor		not available to me	certain age	cost		uncomfortable	embarrassing	necessary		embarrassing	doctor	necessary		uncomfortable	embarrasing	necessary
60+	Female	USA	New Pap smear	Yes		50,000 to 74,999	West South Central	Android Phone / Tablet		Better	Unknown	Different		Unknown	Mystery	Questions		Unknown	Questions	Scary		Old	Painful	Same		Better	Painful	Helping
45-59	Female	AUS	HPV test	Yes		90,000 to 119,999	Victoria	iOS Phone / Tablet		Needle	Pain	Not available to me		Needle	Pain	Not available tome		Warts	Pap smear	Cancer		Discomfort	Embarrassment	Safe		Discomfort	Embarrassment	Safe
45-59	Female	AUS	New Pap smear	No		60,000 to 89,999	Victoria	Windows Desktop / Laptop		good	safe	imperfect		good	safe	imperfect		embarrasing	scary	nurse		ouch	embarassing	scary		promising	embarrasing	scary
30-44	Female	USA	New Pap smear	No		50,000 to 74,999	West North Central	Android Phone / Tablet		Helpful	Dr office	Quick		Painful	Scary	Cancer		Scary	Invasive	Cancer		Required	Invasive	Yuck		Questionable	Relevance	Hopeful
45-59	Female	AUS	HPV test	Yes		180,000 or more	Western Australia	iOS Phone / Tablet		Easy	Quick	Safe		Needle	Non-invasive	Fantastic		More coverage	Invasive	Better		Embarrassing	Invasive	Humiliating		Invasive	Better	Encompassing
30-44	Female	AUS	New Pap smear	No		30,000 to 59,999	Queensland	Windows Desktop / Laptop		test	not	known		good	idea	yes		unsure	unsure	unsure		ladies	health	concerns		unsure	unsure	unsure
60+	Female	USA	New Pap smear	Yes		50,000 to 74,999	Middle Atlantic	iOS Phone / Tablet		Prevention	Vaginitis	Against		Prevention	Vaginitis	Against		Prevention	Vaginitis	Against		Prevention	Vaginitis	Against		Prevention	Vaginitis	Against
45-59	Female	AUS	New Pap smear	Yes		0 to 29,999	Queensland	Windows Desktop / Laptop		not sure	not sure	not sure		not sure	not sure	not sure		not sure	not sure	not sure		annoying	unpleasant	not sure		not sure	not sure	not sure
30-44	Female	AUS	New Pap smear	No		90,000 to 119,999	Northern Territory	Windows Desktop / Laptop		vdv	DSVF	SV		cancer	needle	doctor		Cancer	Female	Uncomfortable		Cancer	Female	Uncomfortable		bra	fdv	av
60+	Female	USA	New Pap smear	No		50,000 to 74,999	Mountain	Windows Desktop / Laptop		whazzat?	unknown	huh?		really??	unheard-of	new?		unfamiliar	why?	how?		diagnostic	prevention	swab		difference?	improvement?	okay
45-59	Female	AUS	HPV test	No		0 to 29,999	Victoria	iOS Phone / Tablet		Good	Life saving	Immunisation		Excellent	Australian	Immunisation		Transferable	Blood	Needle		Hate	Discomfort	Necessary		Yearly	Uncomfortable	Yuck
45-59	Female	USA	HPV test	No		50,000 to 74,999	East South Central	Windows Desktop / Laptop		unknown	uncertain	new		unknown	unfamiliar	new		unknown	new	uncertain		reliable	informative	simple		unknown	uncertain	unfamiliar
18-29	Female	AUS	New Pap smear	No		60,000 to 89,999	Victoria	Android Phone / Tablet		Needle	Health	Good		Cancer	Healthy	Screening		Good	Health	Happy		Health	Cancer	Old		Health	Cancer	Happy
45-59	Female	AUS	HPV test	No		0 to 29,999	Victoria	Windows Desktop / Laptop		?beneficial	painful	teenagers		teenagers	costs	successful?		accuracy	broad	specific		uncomfortable	? accuracy	females		unsure	uncomfy	?improved
30-44	Female	AUS	New Pap smear	Yes		60,000 to 89,999	Victoria	Android Phone / Tablet		Necessary	Prevention	Good		Vital	Necessary	Good		Good	Worthwhile	Prevention		Worthwhile	Necessary	Good		Vital	Necessary	Comfortable
30-44	Female	AUS	New Pap smear	No		Prefer not to answer	South Australia	Windows Desktop / Laptop		prevention	helps	cancer		cancer	prevention	helpful		cancer	safety	prevention		detection	cancer	scary		prevention	detection	cancer
60+	Female	USA	New Pap smear	No		75,000 to 99,999	Mountain	Android Phone / Tablet		Unsure	Concerned	Scared		Confidence	Peace	Worried		New	Better	Stress		Old	Insecure	Worrisome		Peace	Safer	Cancer
30-44	Female	AUS	HPV test	Yes		Prefer not to answer	Victoria	iOS Phone / Tablet		Prevention	Cervix	Cancer		Reduce	Risk	Detection		Cervical	Cancer	Oral		Doctor	Cancer	Cervix		Chance	Improved	Detection
45-59	Female	USA	New Pap smear	No		25,000 to 49,999	Pacific	Windows Desktop / Laptop		sex	unprotect sex	dirty		unknown	unknown	unknown		sex	unprotect sex	three people sex		sex active	share three people sex	drink caffiinee much		i dont know	i dont know	i dont know
18-29	Female	AUS	HPV test	No		30,000 to 59,999	New South Wales	iOS Phone / Tablet		Yes	Yes	Yes		Djdk	Sjsj	Hddj		No	Yes	Maybe		No	Pap	Smear		What	Is	This
45-59	Female	USA	HPV test	No		10,000 to 24,999	Pacific	Windows Desktop / Laptop		smart	angry	useless		gallon	sweepstakes	humorous		unusual	circumstantial	different		one	preposterous	conservative		ridiculous	unnecessary	hopeful
60+	Female	USA	HPV test	Yes		75,000 to 99,999	Pacific	iOS Phone / Tablet		New	Good	Easy		Good	Exciting	Helpful		Sensitive	Exact	Precise		Good	Easy	Known		Innovative	Better	Good
60+	Female	USA	New Pap smear	No		50,000 to 74,999	South Atlantic	Windows Desktop / Laptop		aids	Human	Pap		cancer	vacine	health		aids	human	pap		private	doctor	health		new	pap	smear
30-44	Female	USA	New Pap smear	No		25,000 to 49,999	South Atlantic	Android Phone / Tablet		Cure	Cancer	Prevent		Needle	Medicine	Sting		Immunization	Shot	Detect		Clamps	Swab	Culture		Cold	Sterile	Swab
45-59	Female	AUS	New Pap smear	No		Prefer not to answer	Victoria	Android Phone / Tablet		Earky detection	Pre cancerous	Easy		Beneficial	Easy	Important		New	Easy	Necessary		Hurts	Early detection	Necessary		Good	Important	Necessary
45-59	Female	AUS	HPV test	Yes		90,000 to 119,999	Western Australia	Windows Desktop / Laptop		necessary	simple	sensible		amazing	long overdue	innovative		necessary	routine	simple		onerous	painful	embarrassing		painful	necessary	routine
45-59	Female	AUS	New Pap smear	No		60,000 to 89,999	Victoria	Windows Desktop / Laptop		SMART	EFFECTIVE	CONTROL		NECESSARY	EFFECTIVE	PEACE-OF-MIND		NOTHING	NOTHING	NOTHING		UNCOMFORTABLE	STRAIGHTFORWARD	NECESSARY		IMPROVEMENT	EFFECTIVE	UNCOMFORTABLE
45-59	Female	USA	New Pap smear	Yes		25,000 to 49,999	East North Central	MacOS Desktop / Laptop		Good	Helpful	Precautionary		Hopeful	Preventative	Good		Good	Smart	Helpful		Doctor	Helpful	Needful		Preventive	Necessary	Good
45-59	Female	USA	New Pap smear	No		25,000 to 49,999	South Atlantic	iOS Phone / Tablet		Shot	Virus	Disease		Injection	Prevention	Female		Question	Disease	Exam		Normal	Test	Same		Same	Easy	Change
45-59	Female	AUS	New Pap smear	No		60,000 to 89,999	Queensland	Windows Desktop / Laptop		std	sex	blood virus		good	necessary	evolved		prevention	sex	testing		specula	vagina	cervix		cancer	trial	specula
45-59	Female	AUS	New Pap smear	Yes		180,000 or more	Victoria	Windows Desktop / Laptop		simple	essential	progress		prevention	simple	progress		uncomfortable	inconvienent	necessary		uncomfortable	inconvienent	necessary		uncomfortable	inconvienent	necessary but better
30-44	Female	AUS	New Pap smear	No		120,000 to 149,999	Victoria	iOS Phone / Tablet		Health	Prevention	Woman		Health	Female	Prevention		Check	Female	Health		Health	Prevention	Check		Prevention	Health	Doctor
45-59	Female	AUS	New Pap smear	No		0 to 29,999	Tasmania	Windows Desktop / Laptop		awesome	fantastic	necessary		necessery	awesome	great		necessary	necessary	necessary		great	awesome	terrific		necessary	necessary	necessary
18-29	Female	AUS	New Pap smear	No		Prefer not to answer	New South Wales	iOS Phone / Tablet		Vaccine	Virus	Cancer		Vaccine	Cancer	Cervix		Virus	Prevention	Cancer		Cervix	Cancer	Test		Better	Prevention	Test
45-59	Female	AUS	HPV test	Yes		Prefer not to answer	Victoria	Android Phone / Tablet		Easy	Quick	Effective		Bonus	Essential	Easy		Convenient	Less invasive	Less embarassing		Awkward	Uncomfortable	Unpleasant		Improved comfort	Time saving?	Less embarassing
45-59	Female	USA	New Pap smear	No		125,000 to 149,999	Pacific	Windows Desktop / Laptop		new	teenagers	precocious		unsure	disinterest	important		unsure	teenager	precocious		oldschool	inaccurate	necessity		unknown	unsure	untried
18-29	Female	AUS	New Pap smear	No		120,000 to 149,999	New South Wales	iOS Phone / Tablet		Sex	Cancer	Kissing		Needle	Hurt	Cancer		Doctor	Fluid	Needle		Doctor	Uncomfortable	Embarrassing		Doctor	Vagina	Uncomfortable
45-59	Female	AUS	HPV test	Yes		Prefer not to answer	New South Wales	Windows Desktop / Laptop		important	unknown	schedule		needed	necessary	wanted		serious	tested	important		uncomfotable	necessary	regular		needed	important	unknown
45-59	Female	AUS	New Pap smear	No		120,000 to 149,999	Queensland	Windows Desktop / Laptop		SPECULUM	PRIVACY	DISCOMFORT		SPECULUM	DISCOMFORT	PRIVACY		SPECULUM	PRIVACY	DISCOMFORT		PRIVACY	SPECULUM	DISCOMFORT		SPECULUM	PRIVACY	DISCOMFORT
18-29	Female	AUS	HPV test	No		60,000 to 89,999	Queensland	Windows Desktop / Laptop		cervical	cancer	prevention		gardasil	prevention	underutilised		cervical	cancer	prevention		cervical	cancer	screening		new	testing	method
45-59	Female	AUS	New Pap smear	No		0 to 29,999	Victoria	MacOS Desktop / Laptop		needs to be for all age groups	prevention	helpful		don't know	haven't got it	what age?		prevention	useful	embarrassing		embarrassing	useful	prevention		prevention	useful	improved
30-44	Female	AUS	New Pap smear	No		120,000 to 149,999	New South Wales	iOS Phone / Tablet		Immunisation	Safe	Necessary		Safe	Necessary	Prevent		Screening	Safe	Preventative		Necesaary	Prevention	Uncomfortable		Technology	Better	Preventative
30-44	Female	AUS	HPV test	No		90,000 to 119,999	New South Wales	Windows Desktop / Laptop		good	helpful	lifesaving		good	lifesaving	helpful		HELPFUL	necessary	preventative		necessary	sigh	required		uninformative	messy	concerning
18-29	Female	AUS	HPV test	Yes		30,000 to 59,999	New South Wales	Windows Desktop / Laptop		yes	good	safe		yes	good	safe		yes	good	safe		yes	good	safe		yes	good	safe
30-44	Female	AUS	HPV test	Yes		30,000 to 59,999	New South Wales	iOS Phone / Tablet		Aids	What	Unsure		Good	costly	Inaccessible		Aids	Scary	Bad		Uncomfortable	Embarrassing	Painful		What	Dislike	No
45-59	Female	AUS	New Pap smear	Yes		60,000 to 89,999	Victoria	Windows Desktop / Laptop		no	remember	idea		no	idea	remember		no	idea	remember		no	idea	remember		no	idea	reme ber
45-59	Female	AUS	New Pap smear	No		Prefer not to answer	Victoria	Windows Desktop / Laptop		should do it	time	results		prevention	diagnosis	pain		detection	must do	friend		regular	results	family		better	quicker	action
45-59	Female	AUS	New Pap smear	No		30,000 to 59,999	Queensland	Android Phone / Tablet		Young	Females	Only		Available	Under	Thirty		Every	Two	Years		Every	Two	Years		Gives	Better	Results
30-44	Female	USA	New Pap smear	No		25,000 to 49,999	East North Central	Android Phone / Tablet		Tweens	Eh	Questions		Eh	Tweens	Questions		Necessary	Common	Inconvenient		Cold	Uncomfortable	Inconvenient		Not sure	Good idea	Inconvenient
30-44	Female	USA	New Pap smear	Yes		50,000 to 74,999	South Atlantic	Android Phone / Tablet		Did I get it	Does it work	Cancer		Vagina	Shot	Doctor		Cancer	How is it done	When should I do it		Ouch	I hate it	Testing		How	Wanna try it	How long
45-59	Female	AUS	New Pap smear	No		60,000 to 89,999	New South Wales	iOS Phone / Tablet		No idea	No idea	No idea		Not had it	Not had it	Not had it		What is it	What is it	What ismit		Had it before	Had it before	Had it before		What's the difference	What's the difference	What's the difference
45-59	Female	AUS	HPV test	No		30,000 to 59,999	New South Wales	MacOS Desktop / Laptop		worthwhile	early	good		worthwhile	needed	early		worthwhile	early	good		worthwhile	early	good		worthwhile	early	good
45-59	Female	AUS	New Pap smear	Yes		Prefer not to answer	Queensland	Windows Desktop / Laptop		herpes	embarrassing	young		scary	doomed	cancer		herpes	warts	unnecessary		personal	necessary	preventative		improved	updated	efficient
18-29	Female	USA	New Pap smear	No		100,000 to 124,999	New England	Windows Desktop / Laptop		important	valuable	quick		easy	necessary	available		common	dangerous	scary		important	uncomfortable	necessary		need	more	info
45-59	Female	AUS	New Pap smear	Yes		Prefer not to answer	Victoria	Windows Desktop / Laptop		Needle	Health	Herpes		Needle	Health	Gynocology		Herpes	Warts	Genitals		Health	Private	Vaginal		Smear	Test	Health
45-59	Female	USA	HPV test	Yes		50,000 to 74,999	Pacific	Windows Desktop / Laptop		side effects	pain	lifesaving		potential	side effect	pain		realistic	lifesaving	medical		routine	medical	uncomfortable		interesting	medical	uncomfortable
45-59	Female	AUS	HPV test	No		Prefer not to answer	New South Wales	iOS Phone / Tablet		Great idea	Preventative	Protection		Great idea	Protection	Reduced need for pap smears		Great new test	Specific	Sensitive		Vaginal health	Yearly	Disliked		Improved	Better sensitivty	Early detector
30-44	Female	AUS	HPV test	Yes		120,000 to 149,999	South Australia	Android Phone / Tablet		Scary	Problems	No		Scary	Issues	No		New	Updated	Valuable		Woman	Adult	Routine		Changed	Old	Different
30-44	Female	USA	New Pap smear	No		75,000 to 99,999	Pacific	Android Phone / Tablet		Freedom	Clean	Safe		Free	Peace	Freedom		Power	Knowledge	Awareness		Pain	Humiliating	Necessary		Fear	Necessary	Humiliating
45-59	Female	AUS	HPV test	No		180,000 or more	Victoria	MacOS Desktop / Laptop		unclear	unknown	ignorant		FALSE	suspicious	confusing		necessary	woman	needs		standard	safety	concern		confusing	unclear	frustrating
18-29	Female	AUS	HPV test	Yes		30,000 to 59,999	Victoria	iOS Phone / Tablet		Internal	Important	Necessary		Necessary	Important	Inexpensive		Important	Necessary	Scary		Scary	Important	Necessary		Internal	Necessary	Solitary
30-44	Female	AUS	HPV test	Yes		Prefer not to answer	Victoria	Android Phone / Tablet		Immunity	Warts	Virus		Prevent	Misnomer	Injection		Better	Prevent	Check		Ew	Vagina	Speculum		Ew	Slimy	Invasion
18-29	Female	AUS	New Pap smear	No		0 to 29,999	New South Wales	iOS Phone / Tablet		Painful	Girls	Needed		Painful	School	Necessary		Cancer	Medical	Unknown		Uncomfortable	Awkward	Needed		Expensive	Uncomfortable	Better
30-44	Female	AUS	HPV test	No		Prefer not to answer	Northern Territory	iOS Phone / Tablet		Prevention	Should	Information		Necessary	Helpful	Done!		Preventative	Doctor	Questions		Uncomfortable	Necessary	Important		Uncomfortable	Necessary	Reliable
18-29	Female	AUS	New Pap smear	Yes		Prefer not to answer	Victoria	iOS Phone / Tablet		Prevention	Needle	Help		Needle	Prevention	Cancer		STD	Clear	Test		Test	Vagina	Stick		Advanced	Vagina	Test
45-59	Female	USA	New Pap smear	Yes		25,000 to 49,999	Pacific	iOS Phone / Tablet		H	P	V		C	A	V		H	P	V		P	A	P		N	E	W
30-44	Female	USA	HPV test	No		25,000 to 49,999	Pacific	Windows Desktop / Laptop		diagnose	none	none		prevent	treatment	none		prevent	none	none		doctor	nothing	nothing		better	none	none
18-29	Female	USA	New Pap smear	No		50,000 to 74,999	Pacific	Windows Desktop / Laptop		Bandade	pap smere	discomfort		Needle	pinch	Crab		Dictionary	antivirus	exam		discomfort	embarassing	no		no	repetative	anual
30-44	Female	AUS	New Pap smear	No		Prefer not to answer	Victoria	Android Phone / Tablet		Unsure	Beneficial	Suspicious		Unsure	Beneficial	Suspicious		Embarrassing	Awkward	Useful		Embarrassing	Awkward	Necessary		Embarrassing	Awkward	Useful
60+	Female	USA	HPV test	No		Prefer not to answer	Pacific	Windows Desktop / Laptop		CERVICAL	PREVENTION	EASY		UNAWARE	WORKS?	NECESSARY		CERVICAL	VIRUS	EARLY DETECTION		NECESSARY	ANNUALLY	UNCOMFORTABLE		WHY NEW	MORE COMPREHENSIVE	EARLY DETECTION
18-29	Female	USA	New Pap smear	Yes		0 to 9,999	Pacific	Android Phone / Tablet		Teens	Sex	Cancer		Teens	Cancer	Prevention		Cervix	Sex	Vagina		Cervix	Gynecologist	Doctor		Cervix	Bettet	Sex
18-29	Female	AUS	New Pap smear	No		0 to 29,999	South Australia	iOS Phone / Tablet		Safe	Preventive	Good		Safe	Good	New		Cancer	Dangerous	Not nice		Pain	Vagina	Cancer		Cancer	Inventive	Preventive
30-44	Female	USA	New Pap smear	No		10,000 to 24,999	Middle Atlantic	Android Phone / Tablet		must	costly	access		must	post40	easy		old	time	obsolete		doc	easy	must		easy	must	prevent
45-59	Female	AUS	New Pap smear	No		120,000 to 149,999	Queensland	Windows Desktop / Laptop		prevention	helath	women		Prevention	Health	Women		Pre-cancerous	Virus	Precaution		Test	Routine	Women		better	test	HPV
30-44	Female	AUS	New Pap smear	No		Prefer not to answer	New South Wales	Windows Desktop / Laptop		vaccine	needle	cervical cancer		young	needle	good		virus	cervix	herpes		smear	doctor	pain		pain	good	information
30-44	Female	AUS	New Pap smear	No		Prefer not to answer	Victoria	Windows Desktop / Laptop		scientific	not sure	prevention		medical	problem	prevention		medical	unpleasant	prevention		medical	problem	prevention		advanced	medical	prvention
45-59	Female	AUS	New Pap smear	No		90,000 to 119,999	Western Australia	Windows Desktop / Laptop		Womans Health Issues	Government Funded	Important Girls and Woman		Important	Woman's Health	Important		Important	Girls and Womans Health	New		Extremely Important	Sexually active pap smears are a must	uncomfortable		Extremely Important	Womans Health Issues	Prevent Cancer
45-59	Female	AUS	New Pap smear	Yes		Prefer not to answer	South Australia	Windows Desktop / Laptop		essential	necessary	treatment		wonderful	essential	breakthrough		wonderful	breakthrough	essential		necessary	routine	essential		better	advanced	optimistic
45-59	Female	AUS	New Pap smear	No		Prefer not to answer	South Australia	Windows Desktop / Laptop		dangerous	unproven	NO		Scary	Unsafe	untested		embarassing	uncomftable	nah		Embarrassing	Ouch	weird		embarassing	strange	icky
45-59	Female	USA	HPV test	Yes		10,000 to 24,999	East South Central	Windows Desktop / Laptop		cure	prevention	epidemic		cure	cancer	cervix		HIV	virus	disease		exam	vaginal	prevention		new	exam	improved
30-44	Female	AUS	New Pap smear	No		Prefer not to answer	New South Wales	iOS Phone / Tablet		Uncomfortable	Desirable	Available		Desirable	Necessary	Important		Important	New	Required		Uncomfortable	Irregular	Required		Uncomfortable	Needed	Hopeful
45-59	Female	AUS	New Pap smear	No		Prefer not to answer	Victoria	Windows Desktop / Laptop		Ineffective	Reaction	Unproven		Mom	Interested	Afraid		Sufficient	Standard	Out-dated		Mom	Overdue	Expensive		Want	Expensive	Experienced
18-29	Female	USA	HPV test	No		0 to 9,999	West South Central	iOS Phone / Tablet		H	P	V		C	C	V		H	P	V		P	P	S		N	P	S
45-59	Female	USA	HPV test	Yes		Prefer not to answer	West South Central	Android Phone / Tablet		life	aware	safe		safe	life	aware		transmitted	disease	contagious		cancer	health	life		novelty	expensier	doctor
30-44	Female	AUS	New Pap smear	Yes			Queensland	iOS Phone / Tablet		Cervix cancer	Girls	Virus		Hpv	Virus	Important		Cancer	Vaccine	Preventable		Cancer	Check	Important		Improved	Cervix cancer	Regularly
30-44	Female	AUS	New Pap smear	No		180,000 or more	New South Wales	iOS Phone / Tablet		Prevention	Young women	Prevention		Young woman	Prevention	New		Sti	Sexual	Warts		Painful	Prevention	Embarrassing		New	Speculum	Expensive
30-44	Female	AUS	New Pap smear	No		180,000 or more	New South Wales	Android Phone / Tablet		Needles	Test	School		Hpv	Safer	Three		Blood?	Smear	Confused		Ouch	Awkward	Necessary		Same	Awkward	Book
45-59	Female	AUS	New Pap smear	No		60,000 to 89,999	South Australia	iOS Phone / Tablet		STD connotation	Secret	Unpleasant		Long life	Useful	Preventative		Horrid	Testing for STD	Don't need it		Uncomfortable	Necessary	Undignified		Improved	Uncomfortable	Undignified
18-29	Female	AUS	New Pap smear	Yes		120,000 to 149,999	Victoria	Android Phone / Tablet		Wide-spread	Easy	Prevention		Easier	Immunisation	Prevention		Early detection	Necessary	Discomfort		Discomfort	Prevention	Necessary		Improved	Early Detection	Necessary
45-59	Female	USA	New Pap smear	Yes		50,000 to 74,999	East South Central	iOS Phone / Tablet		Helpful	Less known	Single		Prevention	Elimination	Brighter future		Helpful	Singular	Narrow		Yuck	Necessary	Life saving		More hope	Better	Prevention
60+	Female	AUS	HPV test	No		30,000 to 59,999	Queensland	Windows Desktop / Laptop		injection	young	age		prevention	age	young		pap	cervix	doctor		doctor	cervix	cancer		examination	new	cancer
30-44	Female	AUS	New Pap smear	Yes		Prefer not to answer	Victoria	iOS Phone / Tablet		2	Ry	Stink		Std	Pussy	Pain		Sex	Dick	Pussy		Hi	Hello	Stop		Relief	Pain	Worried
45-59	Female	AUS	New Pap smear	Yes		Prefer not to answer	Victoria	Other		virus	cervix	std		hpv	virus	std		cervical	std test	infection		cervix	cancer	test		cervix	improved	women
45-59	Female	AUS	HPV test	No		60,000 to 89,999	Victoria	iOS Phone / Tablet		Needle	Vaccination	Immunisation		Needle	Teenager	Vaccine		Test	Hpv	Cancer		HPv	Vagina	Awkward		Vagina	Awkward	New
45-59	Female	USA	New Pap smear	Yes		10,000 to 24,999	Mountain	Android Phone / Tablet		safe	easy	good		good	helps	condoms		safe	helps	test		routine	screen	cancer		safe	needed	helps
30-44	Female	AUS	New Pap smear	No		60,000 to 89,999	Victoria	iOS Phone / Tablet		Treatment	Virus	Pap		Cancer	Dying	Early		Detection	Monitor	Prevent		Pain	Cold	Invasive		Test	Two years	Survive
60+	Female	AUS	New Pap smear	No		Prefer not to answer	Western Australia	Windows Desktop / Laptop		HIV	prevention	nonspecific		injection	prevention	cure		herpes	virus	HIV		familiar	medical requirement	required		non invasive	new	stremlined
18-29	Female	AUS	New Pap smear	No		180,000 or more	Western Australia	MacOS Desktop / Laptop		School	Girls	Test		Girls	Needle	Protection		Virology	Cells	Needle		Doctor	Painful	Cancer		Test	Doctor	Painful
45-59	Female	USA	HPV test	Yes		10,000 to 24,999	New England	Windows Desktop / Laptop		none	none	none		none	none	none		none	none	none		none	none	none		none	none	none
30-44	Female	AUS	New Pap smear	No		0 to 29,999	New South Wales	iOS Phone / Tablet		Injection	Disease	Herpies		Injection	Prevention	Cancer		Disease	Virus	Screen		Cervix	Scrape	Painful		Improved	Similar	Pap smear
30-44	Female	AUS	HPV test	Yes		Prefer not to answer	South Australia	Android Phone / Tablet		fine	sure	whateever		ouch	needle	when		huh?	what	bloodtest?		eww	no	never		ewww	different?	no
30-44	Female	AUS	New Pap smear	No		60,000 to 89,999	South Australia	iOS Phone / Tablet		Necessary	Teenagers	Std		Good	Reliable	Misleading		Std	Women	Confronting		Invasive	Neccessary	Tedious		Fast	Efficient	Effective
45-59	Female	AUS	HPV test	Yes		Prefer not to answer	Victoria	iOS Phone / Tablet		Consent	Risks	Need		Risk	Actual benefits	Informed consent		Better	Self testing	Less over treatment		Unreliable	False positives	Over treatment		Elective	Evidence	Informed consent
45-59	Female	AUS	New Pap smear	No		120,000 to 149,999	Victoria	iOS Phone / Tablet		Female	Health	Vaccine		Women	Health	Vaccine		Female	Health	Unknown		Women	Health	Uncomfortable		Women	Health	Uncomfortable
45-59	Female	AUS	New Pap smear	No		Prefer not to answer	Queensland	iOS Phone / Tablet		Guardasil	Cancer	Fraser		Prevention	Guardasil	Health		Cancer	Prevention	Head and neck cancer		Cancer	Prevention	Gynaecology		Prevention	Cancer	Health
18-29	Female	AUS	HPV test	Yes		Prefer not to answer	South Australia	Android Phone / Tablet		Good	Prevention	Done		Good	Had	Prevention		Hiv	Test	Medical		Yuck	Necessary	Embarrassing		Important	Yuck	New
45-59	Female	AUS	New Pap smear	No		30,000 to 59,999	Western Australia	Windows Desktop / Laptop		cervical	prevent	test		GP	prevent	good		new	test	cancer		pain	prevent	GP		better	early	cancer
30-44	Female	AUS	HPV test	Yes		60,000 to 89,999	Victoria	iOS Phone / Tablet		Painful	Doses	Important		Pain	Important	Relevant		Discomfort	Curiosity	Important		Discomfort	Embarrasment	Pain		Pain	Important	Health
30-44	Female	USA	HPV test	Yes		Prefer not to answer	Pacific	Android Phone / Tablet		overkill	dangerous	no		no	nooo	nooo		cervix	warts	cancer		routine	geniocologist	cold		HPV	Virus	Detection
45-59	Female	AUS	New Pap smear	No		90,000 to 119,999	New South Wales	Windows Desktop / Laptop		yes	please	everyone		yes	please	everyone		test	virus	papilloma		pap	smear	doctor		new	pap	smear
45-59	Female	AUS	New Pap smear	No		Prefer not to answer	New South Wales	iOS Phone / Tablet		Needed	Required	Now		Yes	Fantastic	Welcomed		Good	Quick result	Better outcome		Needed	Not liked	Must do		Better	Accurate	Easy
45-59	Female	AUS	New Pap smear	Yes		0 to 29,999	Victoria	Windows Desktop / Laptop		needle	prevenative	women		preventative	younger women	needle		blood test	smear test	vagina		embarrassing	annoying	dislike		still embarrssing	quicker results	early detection
45-59	Female	AUS	HPV test	Yes		Prefer not to answer	New South Wales	MacOS Desktop / Laptop		definitely	life-saving	invaluable		fantastic	life-saving	teenagers		STDs	safety	precaution		speculum	vagina	test		great	speculum	vagina
18-29	Female	AUS	New Pap smear	No		90,000 to 119,999	Victoria	Android Phone / Tablet		Needles	Doctors	Smells		Needles	Legs	Cotton buds		HIV	Papaw	Pencils		Margarine	Food	Ow		Logos	Test subjects	Doctors
30-44	Female	AUS	HPV test	No		60,000 to 89,999	Victoria	iOS Phone / Tablet		Life saving	Young people	Needle		Important	Life changing	Future		Important	Uncomfortable	Anxious		Intrusive	Uncomfortable	Necessary		Unknown	Speculum	Internal
45-59	Female	AUS	New Pap smear	No		0 to 29,999	Western Australia	Windows Desktop / Laptop		trust	easy	safe		safe	easy	better		safe	easy	trust		safe	better	trust		easy	better	safe
60+	Female	USA	New Pap smear	No		10,000 to 24,999	South Atlantic	Android Phone / Tablet		Unsure	Education	Cost		Available	Cost	Needed		Females	Testing	No		Dread	Preventive	Required		Interesting	Preventive	Timely
45-59	Female	AUS	HPV test	Yes		0 to 29,999	Victoria	Windows Desktop / Laptop		none	none	none		none	none	none		none	none	none		none	none	none		none	none	none
18-29	Female	AUS	HPV test	No		30,000 to 59,999	South Australia	iOS Phone / Tablet		Reduces	Risk	Cancer		Reduces	Risk	Considerably		Cervical	Cancer	Virus		Detects	Precancerous	Changes		Greater	Efficacy	Reduced risk
18-29	Female	AUS	New Pap smear	Yes		60,000 to 89,999	New South Wales	Android Phone / Tablet		Reasurring	Safe	Smart		Reasuring	Safe	Smart		Reasurring	Safe	Smart		Reasurring	Safe	Smart		Reasurring	Safe	Smart
45-59	Female	AUS	New Pap smear	No		150,000 to 179,999	Western Australia	Windows Desktop / Laptop		do	not	know		do	not	know		do	not	know		embarassing	hurts	disgusting		do	not	know
30-44	Female	AUS	HPV test	No		Prefer not to answer	New South Wales	iOS Phone / Tablet		Preventative	Injection	Cancer		Prevent	Cancer	Injection		Stop	Cancer	Early		Stop	Cancer	Early		Stop	Cancer	Early
45-59	Female	AUS	New Pap smear	No		Prefer not to answer	New South Wales	iOS Phone / Tablet		Better	Sensible	Preventative		Sensible	Preventative	Comforting		Yuck	No	Irrelevant		Yuck	No	Avoid		Yack	No	Avoid
18-29	Female	USA	New Pap smear	No		50,000 to 74,999	South Atlantic	Windows Desktop / Laptop		Doctor	Injection	Medication		Shot	Treatment	Doctor		Test	Detection	Treatment		Cold	Embarassment	Uncomfortable		Unknown	New	Explain
18-29	Female	AUS	New Pap smear	No		120,000 to 149,999	Victoria	iOS Phone / Tablet		Health	Unfamiliar	Prevention		Preventative	Important	Health		STI	Serious	Warts		Important	Easy	Normal		Better	Health	Effective
18-29	Female	AUS	HPV test	No		Prefer not to answer	South Australia	Windows Desktop / Laptop		important	magical	cool		brilliant	helpful	life-saving		accurate	ouch	idk		discomfort	seriously	ow		ouch	omg	ouch
18-29	Female	AUS	HPV test	No		90,000 to 119,999	Western Australia	Windows Desktop / Laptop		cancer	prevention	injection		prevention	cancer	women		cervix	cancer	virus		women	vagina	doctor		new	vagina	doctor
45-59	Female	AUS	New Pap smear	Yes		Prefer not to answer	Queensland	MacOS Desktop / Laptop		Human	P	Virus		Dangerous	Uncertain	Unknown		Unknown	Who	How		P	A	P		Better	Early	Effective
45-59	Female	AUS	New Pap smear	No		30,000 to 59,999	Queensland	Windows Desktop / Laptop		succesful	boys	missed out		Dr Ian Fraser	vaccine	CSL		doctor	pathology	cancer		Doctor	uncomfortable	dread		ignorant	didn't know	uncomfortable
45-59	Female	USA	New Pap smear	No		0 to 9,999	South Atlantic	Android Phone / Tablet		something to get	should already have gotton	health happy		good to get	make life better	easy to get		good	safe	easy on the mi d		once a year	smart choice	make sure of good health		good	safe	need
45-59	Female	AUS	HPV test	No		150,000 to 179,999	Northern Territory	iOS Phone / Tablet		Intrusive	Uncomfortable	Painful		Injection	Clinic	Checkups		Intrusive	Pain	Uncomfortable		Uncomfortable	Pain	Put off		Thougher	Intrusive	Hurt
18-29	Female	AUS	HPV test	Yes		90,000 to 119,999	Queensland	iOS Phone / Tablet		Important	Preventative	Safe		Vital	Safe	New		New	Accurate	Important		Invasive	Awkward	Important		Uncomfortable	Important	Awkward
60+	Female	AUS	New Pap smear	No		0 to 29,999	Western Australia	iOS Phone / Tablet		Good	Useful	Necessary		Good	Needed	Necessary		Warts	Smear	Sex		Necessary	Essential	Required		Better	Good	Necessary
18-29	Female	AUS	HPV test	No		60,000 to 89,999	Queensland	iOS Phone / Tablet		Quick	Affordable	Easy		Quick	Ideal	Painless		Quick	Easy	Afforabke		Painless	Quick	Affordable		Terrifying	Horrifying	Futuristic
45-59	Female	AUS	New Pap smear	No		30,000 to 59,999	Queensland	iOS Phone / Tablet		Preventative	Cheap	Easy		Preventative	Easy	Important		Importatn	Preventative	Cheap		Intrusive	Embarassing	Necessary		Effective	Important	Safe
30-44	Female	AUS	New Pap smear	No		60,000 to 89,999	Victoria	Windows Desktop / Laptop		protection	avoidance	cancer		protection	cervix cancer	pap smear		pap smear	cancer	cancer protection		cancer prevention	vaginal tests	proection		cancer	no children	pap smear
30-44	Female	AUS	New Pap smear	No		120,000 to 149,999	Victoria	iOS Phone / Tablet		Hiv	Cure	Vaccine		Cancer	Pain	Radiation		Hiv	Test	Disease		Sore	Brave	Healthy		Innovation	Sore	Brave
45-59	Female	AUS	HPV test	No		90,000 to 119,999	Victoria	iOS Phone / Tablet		Unknown	Research	New		Research	Unknown	New		Unknown	Research	New		Uncomfortable	Regular	Safe		Health	Cancer	Regular
45-59	Female	AUS	HPV test	No		60,000 to 89,999	Queensland	Android Phone / Tablet		Risk	Maybe	Protection		Protection	Saving	Risky		Infectious	Transmittable	Pain		Yuck	Scary	Invasive		Hopeful	Possible	Different
30-44	Female	AUS	New Pap smear	Yes		Prefer not to answer	New South Wales	iOS Phone / Tablet		Needle	STD	Doctor		Needle	Lifesaving	Doctor		Blood test	Pap smear	STD		Vaginal examination	Scraping	Cancer		Advanced	Less scary	Vaginal examination
30-44	Female	AUS	HPV test	No		Prefer not to answer	Western Australia	Windows Desktop / Laptop		Yucky	Invasive	Needed		Great	Needed	Yesplease		Lifechanging	Required	Uncomfortable		Yucky	Uncomfortable	Invasive		Soundsgood	Invasive	Gross
45-59	Female	AUS	New Pap smear	No		120,000 to 149,999	Victoria	iOS Phone / Tablet		Preventstive	Injection	Vaccine		Injection	Needle	Preventative		Hpv	Test	Virus		Test	Speculum	Doctor		Hpv	Speculum	Doctor
45-59	Female	AUS	HPV test	No		Prefer not to answer	New South Wales	Windows Desktop / Laptop		breakthrough	terrific	better		newish	effective	wonderful		awkward	embarrassing	important		awkward	embarrassing	important		awkward	embarrassing	important
45-59	Female	AUS	New Pap smear	No		180,000 or more	New South Wales	Windows Desktop / Laptop		what	new	ideally		great	young	too old		essential	embarrassing	yearly		yes	regularly	embarrassing		good	timely	great
18-29	Female	USA	New Pap smear	No		25,000 to 49,999	East North Central	Android Phone / Tablet		Virus	Prevention	Test		Women	Illness	Prevention		Exam	Illness	Microbiology		Vaginal	Cold	Uncomfortable		Efficient	Screening	Doctor
45-59	Female	AUS	New Pap smear	Yes		Prefer not to answer	Victoria	Windows Desktop / Laptop		stop	papilloma	virus		stop	cervical	cancer		test	for	virus		have	to	have		new	pap	smear
18-29	Female	AUS	New Pap smear	No		30,000 to 59,999	New South Wales	Android Phone / Tablet		awkward	reasuring	easy		paiful	worthwhile	resuring		uncomfotable	worthwhile	painless		awkward	reasuring	painless		unknown	.	.
30-44	Female	AUS	New Pap smear	Yes		Prefer not to answer	Western Australia	iOS Phone / Tablet		Needles	Girls	School		Girls	Sex	Prevent		Laser	Burnt	Abnormal		New	Pap	Smear		Old	Pap	Smear
45-59	Female	AUS	New Pap smear	No		30,000 to 59,999	South Australia	MacOS Desktop / Laptop		innoculation	antibodies	immune		prevention	permanent	once only		detection	test	virus		cancer	invasive	uncomfortable		no change	annual	early detection
45-59	Female	AUS	New Pap smear	No		150,000 to 179,999	Victoria	iOS Phone / Tablet		Good	Questions	Easy		Great	Positive	Easy		Unsure	Unclear	Questions		Uncomfortable	Necessary	Worthwhile		Better	Uncomfortable	Necessary
45-59	Female	AUS	New Pap smear	No		90,000 to 119,999	Victoria	Windows Desktop / Laptop		x	x	x		gardisil	young women and girls	expensive		genital warts	x	x		necessary	uncomfortable	worthwhile		x	x	x
45-59	Female	AUS	New Pap smear	No		180,000 or more	Western Australia	Windows Desktop / Laptop		good	easy	test		unknow	good	when		pap	cancer	test		test	neccesity	regular		news	better	progress
30-44	Female	AUS	New Pap smear	No		30,000 to 59,999	South Australia	iOS Phone / Tablet		Breakthrough	Miracle	Safe		Awesome	Breakthrough	Safe		Pap smear	Sex	Cancer		Invasive	Pain	Uncomfortable		Accurate	Save life	Live
18-29	Female	USA	HPV test	No		0 to 9,999	West North Central	Android Phone / Tablet		Needed	helpful	clear		positive	helpful	confusing		clear	straight forward	Needed		yearly	woman	comprehensive		innovative	helpful	clear
30-44	Female	USA	New Pap smear	No		25,000 to 49,999	West South Central	Windows Desktop / Laptop		Prevention	Help	Effective		Important	Calming	Necessary		Detection	Knowledge	Health		Diagnostic	Needed	Informative		Innovative	Interesting	Helpful
30-44	Female	AUS	New Pap smear	Yes		180,000 or more	Victoria	iOS Phone / Tablet		Necessary	Great	Breakthrough		Awesome	Breakthrough	Necessary		Necessary	Unsure	Unsure		Necessary	Uncomfortable	Biannual		Good	Uncomfortable	Necessary
30-44	Female	AUS	HPV test	No		90,000 to 119,999	Victoria	iOS Phone / Tablet		Same	Don't know	Confused		Excellent	I'm too old	Progress		New	Related to vaccine	Unknown		Infrequent	Necessary	Uncomfortable		Unsure	Need more information	Unknown
18-29	Female	AUS	New Pap smear	Yes		60,000 to 89,999	Victoria	Windows Desktop / Laptop		Protection	Necessary	Prevention		Prevention	Neccessary	Protection		Warts	STI	Vaccination		Regular	Invasive	Protection		Invasive	Prevention	Pretection
18-29	Female	AUS	New Pap smear	No		30,000 to 59,999	Western Australia	Windows Desktop / Laptop		hgh	ghf	ghf		sdfs	sdfs	sfsd		ty	ffh	fghgf		NOt	good	at all		st	isk	is
45-59	Female	AUS	New Pap smear	Yes		60,000 to 89,999	Victoria	MacOS Desktop / Laptop		sex	fornication	adultery		potentially dangerous	insufficiently researched	easy		annoying	unnecessary	for some		unpleasant	compulsory	important		better	successful	lives
45-59	Female	AUS	New Pap smear	No		90,000 to 119,999	Queensland	iOS Phone / Tablet		Yes	Great idea	Preferable option		Prefer	Necessary	Great		Uncomfortable	Necessary	Awkward		Uncomfortable	Necessary	Dislike		Still awkward	Still uncomfortable	Hate-internal-examinations
18-29	Female	AUS	New Pap smear	No		0 to 29,999	Victoria	iOS Phone / Tablet		Needles	Pain	Good for you		Good	Necessary	Life savign		Life saving	Brilliant	Pain		Painful	Helpful	Good		Tickles	Weird	Helpful
30-44	Female	AUS	New Pap smear	Yes		0 to 29,999	Queensland	iOS Phone / Tablet		Young women	Pre-infection	Warts		Misleading	HPV	Young women		Warts	Injection	Sexually transmitted		Pain	Speculum	Regular		Less painful?	Difference	Cynicism
45-59	Female	AUS	New Pap smear	Yes		120,000 to 149,999	Queensland	MacOS Desktop / Laptop		needle	prevents	necessary		prevents	safety	needle		warts	screening	safety		yuk	pain	embarrassing		pain	curious	safety
30-44	Female	USA	New Pap smear	Yes		100,000 to 124,999	Middle Atlantic	iOS Phone / Tablet		Teenager	Not relevant	Both sexes		New	Smart	Lifesaving		Kids	Both sexes	NA		Female	Exam	Burning		NA	NA	NA
45-59	Female	AUS	New Pap smear	Yes		Prefer not to answer	South Australia	Windows Desktop / Laptop		prevention	diseases	free		yes	prevention	save lives		new test	cancer prevention	similar to new pap smear test		test	uncomfortable	prevention		cancer	new cell detection	another test
45-59	Female	USA	HPV test	No		Prefer not to answer	New England	iOS Phone / Tablet		Girls	Good	Prevention		Nice	Hopeful	Happy		Sex	Girls	Commercial		Yucky	Needed	Healthy		Good	Detection	Healthy
45-59	Female	AUS	HPV test	No			Queensland	Windows Desktop / Laptop		precaution	prevention	new		prevention	protection	precaution		caution	prevention	treatment		prevention	precaution	regularity		na	na	na
30-44	Female	AUS	New Pap smear	No		Prefer not to answer	Queensland	iOS Phone / Tablet		Preventative	Needle	Virus		HPV	Needle	Preventative		Test	Genital	Smear		Vaginal	Speculum	Test		Vaginal	Speculum	Test
30-44	Female	AUS	HPV test	No		Prefer not to answer	Western Australia	iOS Phone / Tablet		Jab	Test results	GP		Jab	Doctor	Discomfort		Scrape	Doctor	Waiting		Annual	Advice	Obligation		Hype	Money	Marketing
45-59	Female	AUS	HPV test	No		Prefer not to answer	Queensland	Windows Desktop / Laptop		excellent	excellent	excellent		excellent	excellent	excellent		pain	embarassment	good		pain	embarassment	good		pain	embarassment	good
45-59	Female	AUS	HPV test	No		60,000 to 89,999	New South Wales	Windows Desktop / Laptop		pap	needle	pain		vaccine	needle	immediate		cancer	doctor	result		cervix	cancer	yuck		speculum	embarrassment	wait
18-29	Female	AUS	HPV test	No		Prefer not to answer	South Australia	Android Phone / Tablet		injection	sexual	sore		check-up	screening	papsmear		virus	sore	vaccination		vagina	scrape	scary		Scary	New	Bad
45-59	Female	AUS	New Pap smear	No		60,000 to 89,999	Western Australia	Windows Desktop / Laptop		painful	negative affects	not on		painful	negative affects	not on		test	preventive	insurance		test	insurance	regular		more up to date	advanced	worthwhile
45-59	Female	AUS	New Pap smear	No		Prefer not to answer	New South Wales	iOS Phone / Tablet		Needle	Protection	Safe		Needle	Prevention	Proactive		Std	Women	New		2 years	Test	Unconfortable		Proactive	Cervix	Improvement
45-59	Female	AUS	HPV test	No		60,000 to 89,999	Western Australia	Windows Desktop / Laptop		Does it work?	How much?	Sounds easy		Interested	Curious	Expensive?		Curious	Cautious	Expensive?		Painful	Undignified	Necessary		What?	How much?	Will it hurt?
45-59	Female	AUS	New Pap smear	No		0 to 29,999	Queensland	Windows Desktop / Laptop		better	STD	risky		unknown	risky	unnecessary		accurate	STD	youth		annual	accurate	common		better	accurate	timely
18-29	Female	AUS	New Pap smear	No		0 to 29,999	Victoria	iOS Phone / Tablet		Printer	Office	Doctor		Needle	School	Arm		Doctor	Gross	Cold		Embarrassing	Cold tools	Exposed		Cold	Exposed	Embarrassed
18-29	Female	AUS	New Pap smear	No		120,000 to 149,999	New South Wales	Android Phone / Tablet		Easu	Quick	Protection		Easy	Quick	Good		Embarrassing	Uncomfortable	Painful		Embarrassing	Uncomfortable	Pqinful		Embarrassing	Uncomfortable	Painful
30-44	Female	AUS	New Pap smear	No		60,000 to 89,999	New South Wales	Android Phone / Tablet		Important	Available	Necessary		Good	Helpful	Safety		Scary	Uncomfortable	Awkward		Shame	Avoid	Discomfort		Curious	Interesting	Discomfort
45-59	Female	AUS	New Pap smear	No		0 to 29,999	Victoria	MacOS Desktop / Laptop		preventer l	l	l		preventer	l	l		herpes	?	?		chekup	l	l		checkup	l	l
60+	Female	AUS	HPV test	Yes		150,000 to 179,999	Victoria	Windows Desktop / Laptop		necessary	professional	needed		appropriate	necessary	impersonal		ecssary	needed	appropriate		clear	impersonal	necessary		necessary	needed	apprpriate
45-59	Female	AUS	New Pap smear	No		Prefer not to answer	Western Australia	Windows Desktop / Laptop		necessary	convenient	easy		dream	interesting	awesome		puberty	women	treatable		useful	convenient	widespread		helpful	easy	convenient
45-59	Female	AUS	HPV test	No		180,000 or more	New South Wales	iOS Phone / Tablet		Cervical	Smear	Test		Necessary	Cervical	Cancer		Cervical	Young	Girls		Uncomfortable	Relax	Better		Wait	Too	Long
30-44	Female	AUS	New Pap smear	Yes		150,000 to 179,999	South Australia	Android Phone / Tablet		Essential	Relief	Safety		Necessary	Essential	Done		Cervical	Cancer	Vaccine		Painful	Uncomfortable	Invasive		Invasive	Painful	Necessary
30-44	Female	AUS	New Pap smear	Yes		60,000 to 89,999	South Australia	iOS Phone / Tablet		Youth	Easy	Part-protection		No	Such	Thing		Unknown	Questions	Doubtful		Yuck	Uncomfortable	Necessary		Improvement	Invasive	Necessary
30-44	Female	AUS	New Pap smear	No		Prefer not to answer	New South Wales	Android Phone / Tablet		Clinical	Professional	Benign		Necessary	Life saving	Good		Scary	Unfamiliar	Unsure		Necessary	Embarrassing	Worrying		Interesting	Better	Necessary
45-59	Female	AUS	New Pap smear	No		30,000 to 59,999	South Australia	Windows Desktop / Laptop		r	g	v		f	c	s		u	e	s		e	f	v		t	s	f
45-59	Female	AUS	New Pap smear	Yes		Prefer not to answer	New South Wales	iOS Phone / Tablet		Stupid	Crazy	Dangerous		Crazy	Dangerous	Stupid		Ideal	Less embarrassing	Easier		Painful	Invasive	Embarrassing		Better	Cleaner	Less invasive
18-29	Female	USA	HPV test	No		50,000 to 74,999	Mountain	MacOS Desktop / Laptop		hurt	needles	ex-boyfriend		needles	necessary	sigh		hiv	papillon	vaccine		"pap"	no	why		ouch	uncomfortable	weird
45-59	Female	USA	New Pap smear	No		50,000 to 74,999	East North Central	Windows Desktop / Laptop		question	uncertainty	health		needles	uncertainty	health		not familiar	ingedients	safety		comfortable	knowing	familiar		open	positive	preventive
30-44	Female	AUS	New Pap smear	No		60,000 to 89,999	Queensland	Android Phone / Tablet		lack	of	knowledge		unsure	maybe	hopeful		good	new	accurate		undignified	necessary	unpleasant		quick	accurate	same
45-59	Female	AUS	New Pap smear	Yes		120,000 to 149,999	Victoria	Windows Desktop / Laptop		women's	health	care		health	check	women		virus	check	women		women's	health	check		cancer	cell	check
45-59	Female	AUS	New Pap smear	Yes		90,000 to 119,999	Victoria	iOS Phone / Tablet		Warts	Cancer	Protection		Protection	Girls	Health		Sex	Disease	Cancer		Health	Prevention	Womeen		Cervix	Women	Protection
18-29	Female	AUS	New Pap smear	No		90,000 to 119,999	New South Wales	iOS Phone / Tablet		Needle	Want	Three		Ouch	Needle	Three		Curious	HIV	When		Sharp	Pointy	Yuck		Swab	Uncomfortable	Doctor
30-44	Female	AUS	New Pap smear	No		Prefer not to answer	Queensland	iOS Phone / Tablet		Good	Worthwhile	Unsure		Women	Helpful	Unsure		Good	Worthwhile	Unsure		Necessary	Life saving	Routine		Good	Worthwhile	Interested
60+	Female	AUS	HPV test	Yes		120,000 to 149,999	New South Wales	iOS Phone / Tablet		Virus	Human	Papiloma		Fenomenal	New	Opprtunity		New	Interesting	Promising		Good	Test	Cervix		More	The	Same
45-59	Female	AUS	HPV test	Yes		60,000 to 89,999	Western Australia	Windows Desktop / Laptop		acronym	technical	jargon		hopeful	cure	painless		detail	sample	spreadable		routine	timing	results		progress	testing	uncomfortable
30-44	Female	AUS	HPV test	No		Prefer not to answer	Victoria	MacOS Desktop / Laptop		needles	easier	protection		miracle	fantastic	easy		invasive	better	gross		Uncomfortable	necessary	gross		still	invasive	better
45-59	Female	AUS	New Pap smear	Yes		Prefer not to answer	Victoria	Android Phone / Tablet		Prevention	Easy	Quick		Needle	Quick	Easy		Safe	Painful	Test		Speculum	Embarassing	Uncomfortable		Don't understand	Speculum	Naked
45-59	Female	AUS	New Pap smear	No		90,000 to 119,999	South Australia	Android Phone / Tablet		Good	Health	Life		Helpful	Good	Useful		Women	Help	Caring		Painful	Intrusive	Embarrassing		Great	Saving	Excellent
45-59	Female	AUS	New Pap smear	No		60,000 to 89,999	New South Wales	Windows Desktop / Laptop		?	?	?		?	?	don't know		?	?	?		horrible	necessary	overdue		need to get one	hopefully not as painful	necessary
45-59	Female	AUS	New Pap smear	No		90,000 to 119,999	Western Australia	iOS Phone / Tablet		Good	Prevent	Cancer		Great	Preventative	Cance		Preventative	Evasive	Help		Scary	Embarrassing	Cancer		Excellent	Preventative	Less invasive
30-44	Female	AUS	HPV test	No		150,000 to 179,999	South Australia	iOS Phone / Tablet		Yes	Ok	Nothing		Yes	Please	Ok		No	No	No		As	Above	Please		Uncomfortable	No	Sad
45-59	Female	AUS	New Pap smear	Yes		150,000 to 179,999	New South Wales	Windows Desktop / Laptop		useful	good	new		new	helpful	smart		intrusive	annoying	useful		awful	uncomfortable	annoying		annoying	interesting	hopeful
30-44	Female	AUS	HPV test	Yes		150,000 to 179,999	New South Wales	iOS Phone / Tablet		Disease	Sucks	Regret		CIN2	Regret	Papsmear		Regret	Wish	Need		Yuk	Awkward	Uncomfortable		Uncomfortable	Vagina	Yuk
60+	Female	AUS	HPV test	No		120,000 to 149,999	Queensland	Windows Desktop / Laptop		My daughter had one	I think I'm too old	Boys can get them too?		Does it work?	Am I too old?	What are my chances without it?		Invented by Australian	Why is it different?	Vaccine or test?		Just do it	healthy	try not to think about it		So what's new?	Do I want the old one or this one?	How is it different from the HPV test?
18-29	Female	AUS	New Pap smear	Yes		Prefer not to answer	South Australia	Windows Desktop / Laptop		safety	health	sex		good	to	do		test	take	check		lady	doctor	sex		cool	idea	yeah
30-44	Female	AUS	HPV test	Yes		120,000 to 149,999	Queensland	Windows Desktop / Laptop		Preventative	Necessary	Life-saving		preventative	life-saving	fantastic		Informative	Life-saving	helpful		necessary	life-saving	informative		Helpful	Informative	Life-saving
30-44	Female	AUS	New Pap smear	No		150,000 to 179,999	Queensland	Windows Desktop / Laptop		vaccine	protection	injection		gardisil	australian	frazer		screening	proactive	vaccine		vaginal	testing	annual		preventative	screening	diagnostic
45-59	Female	AUS	New Pap smear	No		180,000 or more	New South Wales	Windows Desktop / Laptop		what	is	it		needed	valuable	essential		good	helpful	needed		necessary	essential	regular		better	good	necessary
30-44	Female	AUS	New Pap smear	No		60,000 to 89,999	South Australia	iOS Phone / Tablet		Unknown	Useful	Important		Easy	Quick	Covered		Same	Uncomfortable	Invasive		Uncomfortable	Necessary	Embarrassing		Unknown	Same	Necessary
45-59	Female	AUS	New Pap smear	Yes		60,000 to 89,999	New South Wales	MacOS Desktop / Laptop		women	injection	prevention		teenagers	painful	injection		women	dna test	cancer		women	bi annually	doctor		cervical cancer	slide	smear
60+	Female	AUS	New Pap smear	No		30,000 to 59,999	Victoria	iOS Phone / Tablet		Needle	Hiv	Doctor		Round	Illness	Needle		Hiv	Warts	Exam		Paper	Blur	Exam		Different	Clinical	Routine
45-59	Female	AUS	New Pap smear	No		120,000 to 149,999	Queensland	MacOS Desktop / Laptop		Breakthrough	Innovative	Necessary		Breakthrough	Lifesaving	Innovative		Smear test	Uncomfortable	Necessary		Uncomfortable	Necessary	Life saving		Confusing	Don't understand the difference with the old	The same old same old
18-29	Female	AUS	New Pap smear	No		30,000 to 59,999	New South Wales	iOS Phone / Tablet		Neddle	Doctor	Relife		Relife	Needle	Pain		Hiv	Scare	Worry		Relife	Doctor	Tests		Worry	Test	Positive
45-59	Female	AUS	New Pap smear	No		Prefer not to answer	Victoria	Android Phone / Tablet		responsible	save self?	dangerous to health?		prevention	life saver	less pap smears?		prevents passing on	knowledge is better than not knowing	know what to do next		yearly	save from cancer	responsibility of each person		saver	quicker detection	more reliable
45-59	Female	AUS	HPV test	Yes		Prefer not to answer	Victoria	iOS Phone / Tablet		Life saving	Easy	Pain free		Life saving	Simple	Easy		Pain	Uncomfortable	Life ssving		PAin	Intrusive	Awarkward		Less intrusive	Easy	Private
18-29	Female	AUS	New Pap smear	Yes		Prefer not to answer	Victoria	iOS Phone / Tablet		Vaccine	Teen	Girls		Prevention	Girls	Women		Cancer	Cervix	Vagina		Cervix	Cancer	Women		Cervix	Cancer	Test
30-44	Female	AUS	New Pap smear	No		Prefer not to answer	New South Wales	Android Phone / Tablet		Acronym alert	OK	Lifesaving		Yes	Understandable	Lifesaving		What?	Yuck	No		Necessary	Uncomfortable	2 years		New	Improved	Same
45-59	Female	AUS	HPV test	No		Prefer not to answer	Queensland	Windows Desktop / Laptop		good	cost	duration		interesting	more information	cost		good	availability	cost		yearly	useful	nessecary		uncertain	benefit	results
30-44	Female	AUS	HPV test	Yes		Prefer not to answer	South Australia	iOS Phone / Tablet		12	Controversial	Unsure		12	Contraversial	Unsure		STI	Smear	Pre-cancer		Not fun	Akward	Necessary		Bogus	Advertising	Uncomfortable
45-59	Female	USA	HPV test	Yes		75,000 to 99,999	New England	iOS Phone / Tablet		Tweens	Controversial	Important		Yes	Yearly	Insurance		Important	New pap	Unconfirmed		Vaginal	Test	Yearly		Difference?	Unconfirmed	Fearful
45-59	Female	AUS	New Pap smear	No		180,000 or more	Victoria	iOS Phone / Tablet		Teenagers	Girls	Worthwhile		Want	Prefer	Unaware		Young girls	Good	New		Painful	Unpleasant	Necessary		Better	Painful	Need
30-44	Female	AUS	New Pap smear	No		90,000 to 119,999	South Australia	iOS Phone / Tablet		Prevention	Teenager	Cancer		HPV Vaccination	Prevention	Teenager		Blood test	Prevent	Instead		Speculum	Vagina	Prevention		Hpv	Speculum	Vagina
18-29	Female	AUS	HPV test	No		0 to 29,999	Victoria	Android Phone / Tablet		Cancer	Injection	Women		Women	Injection	Scared		STD	Scans	Doctor		Cervix	Doctor	Painful		Confused	Painful	Vaginal
45-59	Female	AUS	HPV test	No		60,000 to 89,999	Victoria	Android Phone / Tablet		good	safe	needle		good	unknown	research		warts	std	cancer		hate	uncomfortable	necessary		better	smear	test
30-44	Female	AUS	New Pap smear	No		120,000 to 149,999	Western Australia	Windows Desktop / Laptop		none	none	none		none	none	none		none	none	none		yes	yes	yes		yes	yes	yes
30-44	Female	USA	New Pap smear	No		25,000 to 49,999	Middle Atlantic	iOS Phone / Tablet		HPV	Relevant	Your		Cervical	Cancer	Vaccination		H	P	V		Girls	Vagina	Hair		New	Pap	Smear
45-59	Female	AUS	HPV test	Yes		Prefer not to answer	Victoria	Windows Desktop / Laptop		awesome	essential	protective		awesome	essential	easy		awesome	new	warning		cumbersome	archaic	needed		same	afterthought	outdated
45-59	Female	AUS	New Pap smear	No		30,000 to 59,999	Queensland	Windows Desktop / Laptop		women	choice	needle		lifesaving	compulsory	young		similar	smear	doctor		uncomfortable	embarassing	inconvenient		vagina	discomfort	breakthrough
45-59	Female	AUS	HPV test	No		Prefer not to answer	Victoria	Windows Desktop / Laptop		needle	cost	necessary		needle	try	new		good	women	regular		original	scraping	reliable		interesting	doctor	checkup
45-59	Female	AUS	New Pap smear	No		30,000 to 59,999	Western Australia	iOS Phone / Tablet		Needle	Nurse	Vaccines		Cancer	Doctor	Hospital		Test	Doctor	Hospital		Nurse	Doctor	Test		Doctor	Test	Hospital
45-59	Female	AUS	HPV test	No		Prefer not to answer	New South Wales	Windows Desktop / Laptop		h	p	v		c	c	v		h	p	v		p	s	t		N	p	s
45-59	Female	AUS	HPV test	No		30,000 to 59,999	New South Wales	Android Phone / Tablet		nessecary	important	life saving		important	great	life changing		important	needed	life changing		necessary	embrassing	discomfort		great news	nessecsry	important
45-59	Female	AUS	New Pap smear	No		30,000 to 59,999	Queensland	Windows Desktop / Laptop		new	wont hurt as much	maybe		unknown	different	hope		same	as	before		necessary	2	yearly		same	as	before
60+	Female	AUS	New Pap smear	No		Prefer not to answer	Victoria	Windows Desktop / Laptop		yearly	regular	checks		prevent	test	regular		virus	test	regular		cancer	important	2 yearly		yearly	test	cancer preventive
45-59	Female	AUS	New Pap smear	No		Prefer not to answer	New South Wales	Windows Desktop / Laptop		preventative	positive	easy		helpful	unsure	availability		availability	helpful	specific		routine	diagnostic	available		unaware	unsure	validity
30-44	Female	AUS	New Pap smear	No		0 to 29,999	New South Wales	Android Phone / Tablet		what?	when	how?		important	breakthrough	saver		needed	important	scary		scary	unconfortable	nervous		excited	worry free	bout time
60+	Female	AUS	New Pap smear	Yes			Victoria	Windows Desktop / Laptop		teenager	injection	prevention		teenager	prevention	injection		warts	smear	doctor		uncomfortable	doctor	necessary		doctor	cancer	biannually
30-44	Female	AUS	New Pap smear	No		120,000 to 149,999	Queensland	iOS Phone / Tablet		Unnecessary	Unproven	Dangerous		Unnecessary	Dangerous	Toxic		Uncomfortable	Personal	Hurt		Embarrasing	Uncomfortable	Messy		Uncomfortable	Thorough	Embarrasing
45-59	Female	AUS	New Pap smear	No		Prefer not to answer	Western Australia	Windows Desktop / Laptop		prevention	teenagers	unknown		prevention	teenagers	unknown		embarrassment	discomfort	invasive		discomfort	embarrassment	expense		embarrassment	discomfort	expense
45-59	Female	AUS	New Pap smear	No		90,000 to 119,999	Western Australia	MacOS Desktop / Laptop		dislike	distrust	unsure		dangerous	herpes	worry		unsure	safe	why		familiar	okay	safe		interested	What	uncertain
45-59	Female	USA	New Pap smear	Yes		100,000 to 124,999	South Atlantic	Windows Desktop / Laptop		boys	girls	important		necessary	important	valuable		important	necessary	underused		important	necessary	valuable		interested	valuable	necessary
45-59	Female	AUS	New Pap smear	Yes		Prefer not to answer	Queensland	MacOS Desktop / Laptop		STD	needle	prevention		unsure	no information	what it is		STD	prevention	not sure		uncomfortable	prevents cancer	essential		unsure	what	it is
18-29	Female	AUS	New Pap smear	No		0 to 29,999	New South Wales	Windows Desktop / Laptop		blood	cure	treatment		easy	treatment	prevention		painful	irregular	blood		scraping	sore	discomfort		pain	discomfort	reliable
45-59	Female	USA	HPV test	Yes		75,000 to 99,999	West South Central	iOS Phone / Tablet		Morality	Teenage	Decision		Better	Reassuring	Blank		Sex	Cancer	Immunization		Ugh	Uncomfortable	Necessary		Ugh	Uncomfortable	Necessary
45-59	Female	AUS	HPV test	No		60,000 to 89,999	Queensland	iOS Phone / Tablet		Human	Virus	Relief		Cervix	Death	Relief		People	Virus	Assessment		Uncomfortable	Remember	Registered		Change	Uncomfortable	Test
60+	Female	AUS	HPV test	No		Prefer not to answer	Victoria	Windows Desktop / Laptop		awareness	helping	living		excellent	prevention	awareness		prevention	safety	new		helping	awareness	importance		safe	helping	cancer
45-59	Female	AUS	New Pap smear	No		Prefer not to answer	Western Australia	Windows Desktop / Laptop		RISKY	COST?	RELIABLE?		UNPROVEN	INJECTIONS	HOPEFULL		NECESSARY	RELIABLE?	DOCTOR		FEMALE	CERVIX	ROUTINE		UNKNOWN	COST?	IMPROVEMENT
18-29	Female	AUS	New Pap smear	Yes		60,000 to 89,999	Victoria	iOS Phone / Tablet		Teenager	Female	Cervical		Teenager	Female	HPV		Female	Vagina	Cancer		Test	Cancer	Female		Update	Test	Female
18-29	Female	AUS	HPV test	No		0 to 29,999	South Australia	Android Phone / Tablet		dont	like	needles!		positive	worthwhile	needles!		needles?	painful?	unknown		awkward	uncomfortable	scary		Don't	understand	original
45-59	Female	USA	New Pap smear	No		Prefer not to answer	East North Central	Windows Desktop / Laptop		question	shot	old		Okay	good	Sure		Pap	yearly	hate		Hate	Pain	Cancer		good	spectrum	hurt
45-59	Female	USA	HPV test	No		25,000 to 49,999	East North Central	Windows Desktop / Laptop		dangerous	risky	toxins		dangerous	toxic	risky		prevention	swab	appointment		ugh!	yearly	prevention		prevention	advanced	yearly
45-59	Female	AUS	New Pap smear	No		60,000 to 89,999	New South Wales	iOS Phone / Tablet		Prevention	Universal	Onceonly		Hpv	Early prevention	Once only		Smear	Precancerous	Prevention		Secondyearly	Examination	Detection		Detection	Easy	Less
60+	Female	AUS	New Pap smear	No		Prefer not to answer	Victoria	Windows Desktop / Laptop		injection	health	sex		illness	hospital	injection		Pap smear	intrusive	health		vagina	intrusion	health		improved	intrusive	health
45-59	Female	AUS	HPV test	No		60,000 to 89,999	New South Wales	Windows Desktop / Laptop		reaction	young	catch all		HVP	prevention	reaction		blood test	smear test	tissue sample		testing	evidence	report		testing	evidence	report
60+	Female	AUS	New Pap smear	No		60,000 to 89,999	South Australia	Android Phone / Tablet		Teenagers	Side effects	Missed		Unknown	Promising	New		Unknown	New	Unsure		Uncomfortable	Embarrassing	Biannual		Better	Reliable	Uncomfortable
45-59	Female	AUS	New Pap smear	No		90,000 to 119,999	South Australia	iOS Phone / Tablet		Unknown	Unsure	New		New	Unsure	Unknown		New	Unsure	Modern		Safe	Old	Awkward		New	Modern	Safe
18-29	Female	AUS	New Pap smear	No		0 to 29,999	New South Wales	iOS Phone / Tablet		Completed	Injection	Teenager		Women	Injection	Teenager		Testing	Blood	Unlikely		Health	Women	Necessary		Pain	Regular	Benefits?
30-44	Female	AUS	New Pap smear	No		90,000 to 119,999	Western Australia	Windows Desktop / Laptop		smart	easy	good		smart	good	yes		smart	scary	sore		intimidating	embarrassing	smart		smart	scary	sore
18-29	Female	AUS	HPV test	No		30,000 to 59,999	New South Wales	Windows Desktop / Laptop		necessary	prevention	women		hpv	needle	doctors		Cervical cancer	needles	prevention		frustrating	invasive	awkward		advanced	uncomfortable	annoying
45-59	Female	AUS	New Pap smear	Yes		60,000 to 89,999	Western Australia	Android Phone / Tablet		Young	Girls	Only		For	Young	Girls		Diagnosis	Virus	Presence		Discomfort	Vaginal	Examination		Better	Diagnostic	Power
45-59	Female	AUS	New Pap smear	Yes		30,000 to 59,999	Victoria	Windows Desktop / Laptop		for	young	women		for	young	women		herpes	dignostic	test		two	yearly	checkup		better	comprehensive	diagnostic
18-29	Female	AUS	New Pap smear	Yes		0 to 29,999	New South Wales	Windows Desktop / Laptop		sharp	painful	important		Important	Painfull	young		scary	useful	ptsd		painful	awkward	important		interesting	painful	awkward
30-44	Female	AUS	HPV test	No		30,000 to 59,999	New South Wales	iOS Phone / Tablet		Injection?	No smear tests?	Prevention		Guarantee?	Clear	Certainty		Scary	Overwhelming	Must do		Uncomfortable	Awkward	Necessary		Why?	Same just different name?	What's the point?
45-59	Female	USA	New Pap smear	Yes		25,000 to 49,999	Mountain	Windows Desktop / Laptop		inhibit	cancer	cervix		lessen	possible	outbreak		foreign	virus	interaction		test	celluar	composite		detect	earlier	safetynet
30-44	Female	AUS	HPV test	No		Prefer not to answer	New South Wales	iOS Phone / Tablet		Simple	Effective	Stressfrre		Easy	Non invasive	Stress free		Preventative	Peace of mind	Saver		Uncomfortable	Occasional	Invasive		Effective	Lifesaving	Reassuring
18-29	Female	AUS	New Pap smear	No		60,000 to 89,999	Queensland	iOS Phone / Tablet		needle	doctor	white		needle	cells	women		cervical	cancer	cells		red	discomfort	clinic		bandage	medicine	nurse
18-29	Female	AUS	New Pap smear	No		90,000 to 119,999	New South Wales	iOS Phone / Tablet		Needle	School	Girls		Needles	Cervix	Vaccine		Vaccination	Pass/Fail	Virus		Vagina	Gross	Sti		New	Different	Doctors Surgery
45-59	Female	AUS	HPV test	No		Prefer not to answer	Western Australia	MacOS Desktop / Laptop		virus	prevention	needle		prevention	cancer	needle		doctors	check	uncomfortable		cells	speculum	uncomfortable		cells	speculum	check
30-44	Female	AUS	New Pap smear	No		120,000 to 149,999	Victoria	Windows Desktop / Laptop		needle	health	uncertainty		precaution	needle	health		std	icky	necessary		feminine	precaution	uncomfortable		modern	clinical	smart
45-59	Female	AUS	New Pap smear	No		Prefer not to answer	Victoria	Android Phone / Tablet		Easy	Pain	Dr		Needle	Nurse	Life		Cold sore	Uncover able	Dr		Pain	Uncovetable	Dr		Good	Smarter	Fast
45-59	Female	AUS	New Pap smear	No		30,000 to 59,999	New South Wales	Android Phone / Tablet		human	papiloma	virus		vaccine	preventable	good		pap	test	Doctor		papiloma	test	Doctor		new	test	revised
45-59	Female	USA	New Pap smear	No		50,000 to 74,999	West South Central	Windows Desktop / Laptop		Virus	Prevention	Shot		What	Where	Ouch		Virus	Check	Young		Annual	Prevention	Vaginal		Annual	Prevention	Vaginal
30-44	Female	AUS	New Pap smear	No		60,000 to 89,999	Queensland	iOS Phone / Tablet		Protection	HIV	What?		Proection	Good	Side effects?		HIV	What?	STD		Uncomfortable	Awkward	Important		Try	Hope	Curious
30-44	Female	AUS	HPV test	No		30,000 to 59,999	Victoria	iOS Phone / Tablet		injection	neccasary	prevention		great	neccasary	prevent		pap smear	vaccine	awkward		uncomfortable	invasive	necessary		uncomfortable	neccasary	awkward
45-59	Female	AUS	New Pap smear	No		Prefer not to answer	New South Wales	iOS Phone / Tablet		Safety	Helpful	Clarity		Health	Promotion	Clear		Linked	To	Cancer		Health	Promotion	Safety		Safer	Defined	Clear
30-44	Female	AUS	New Pap smear	Yes		150,000 to 179,999	New South Wales	iOS Phone / Tablet		Prevention	New	Effective		New	Effective	Prevention		STD	Lesions	Pap smear		Speculum	Test	HPV		Benefit?	Cons?	Cost?
30-44	Female	AUS	HPV test	No		60,000 to 89,999	Victoria	Android Phone / Tablet		Unheard of?	Needle?	Helpful?		Beneficial	Needle?	Unsure		Speculum	Uncomfortable	Vagina		Awkward	Embarrassing	Nevessary		Unclear	Unsure	Lacking info
45-59	Female	AUS	HPV test	No		30,000 to 59,999	South Australia	Windows Desktop / Laptop		detection	hereditary	screening		shot	easy	simple		choice	knowledge	worry		worry	needed	medical		test	uncomfortable	embarassing
18-29	Female	AUS	New Pap smear	No		30,000 to 59,999	New South Wales	Windows Desktop / Laptop		helps	serious	good		preventative	scary	safe		don't	know	it		safe	invasive	?		sounds	scary	safe
30-44	Female	AUS	HPV test	No		180,000 or more	Western Australia	Windows Desktop / Laptop		teenage	quick	efficient		teenage	long term	failsafe		female	mandatory	failsafe		failsafe	quick	mandatory		innovative	efficient	modern
60+	Female	USA	HPV test	No		75,000 to 99,999	New England	Windows Desktop / Laptop		easier	non-invasive	protection		disease	late	hurt		new	early	find		invasive	risk	violate		better	helps	early
45-59	Female	AUS	New Pap smear	No		Prefer not to answer	Victoria	Windows Desktop / Laptop		ineffective	problematic	sexuality		unsure	how	ugh		unnecessary	why	sexuality		annoying	humiliating	helpful		new	same	better
45-59	Female	AUS	New Pap smear	No		60,000 to 89,999	South Australia	Windows Desktop / Laptop		injection	women	necessary		injection	free	girls		results	better	accurate		must do	uncomfortable	necessary		promising	better	results
45-59	Female	AUS	New Pap smear	No		180,000 or more	Victoria	Windows Desktop / Laptop		injection	stop infection	women		injection	reduce cancer	young women		virus	cervical cancer	speculum		yuk	horrible	vulnerable		speculum	uncomfortable	necessary
18-29	Female	USA	New Pap smear	No		0 to 9,999	Pacific	Android Phone / Tablet		shot	prevention	side effects		shot	necessary	side effects		culture	biopsy	pinch		personal	uncomfortable	needed		uncomfortable	prevention	personal
45-59	Female	AUS	New Pap smear	No		180,000 or more	New South Wales	iOS Phone / Tablet		Why	Moneymaking?	Ineffective?		Unknown	Money-making?	Unproven		Unknown	Moneymaking?	Commercial		Regular	Painful	Duty		Same?	Tedious	When
30-44	Female	AUS	New Pap smear	No		Prefer not to answer	Queensland	Android Phone / Tablet		Girls	Essential	Health care		Girls	Sixteen	Vital		Smear	Test	Anticancer		Essential	Health	Check		New	Anticancer	Test
30-44	Female	USA	New Pap smear	Yes		75,000 to 99,999	South Atlantic	iOS Phone / Tablet		Same as cervical cancer vaccination	There is no difference	I see them as identical because they are		Important	Effective	Primary prevention		Accurate	Useful to determine care plan	Infrequently performed		Secondary prevention	Routine	ASCCP		Innovative	Overpriced	Informative
45-59	Female	USA	New Pap smear	No		175,000 to 199,999	East North Central	MacOS Desktop / Laptop		good advice	for young women	new		safe	doctor suggested	protection		unnecessary	for the youth	already tested		yearly	necessary	preventative		necessary	new option	curious
45-59	Female	USA	HPV test	No		50,000 to 74,999	New England	Windows Desktop / Laptop		vaginal	disease	shot		vaginal	diseas	shot		vaginal	cervical	exam		vaginal	uterius	exam		product	vaginal	test
30-44	Female	USA	HPV test	No		50,000 to 74,999	South Atlantic	iOS Phone / Tablet		Good	Helpful	Young		Really	Good	Friend		Std	Unnecessary	Unknown		Uncomfortable	Gross	Cold		Unknown	Why	Frustration
30-44	Female	AUS	New Pap smear	No		Prefer not to answer	Victoria	iOS Phone / Tablet		Needle	Herpes	Doctor		Needle	Lifesaving	Doctor		Herpes	Necessary	Yuck		Vagina	Discomfort	Doctor		Better	Improved	Accurate
45-59	Female	AUS	New Pap smear	No		30,000 to 59,999	Victoria	Android Phone / Tablet		needle	prevention	young		cancer	prevention	treatment		cancer	no symptoms	smear		lie down	speculum	doctor		old	uncomfortable	speculum
45-59	Female	AUS	New Pap smear	Yes		180,000 or more	Western Australia	Windows Desktop / Laptop		hopeful	new	necessary		Gardasil	daughter	needles		current	invasive	necessary		yuck	sad	necessary		new	invasive	better
60+	Female	USA	New Pap smear	Yes		25,000 to 49,999	Middle Atlantic	Windows Desktop / Laptop		great	useful	wonderful		great	useful	wonderful		useful	necessary	safe		necessary	lifesaver	ucky		great	helpful	improvement
45-59	Female	AUS	New Pap smear	No		120,000 to 149,999	Queensland	Windows Desktop / Laptop		fantastic	breakthrough	advances		life	saving	needle		womens	tests	young		life	saving	test		great	new	idea
45-59	Female	AUS	HPV test	No		0 to 29,999	Queensland	Android Phone / Tablet		Interested	Preventative	Side effects		What?	Unknown	Curious		Best	Effective	Same		Regular	Uncomfortable	Necessary		New	Better	Same
45-59	Female	USA	New Pap smear	Yes		100,000 to 124,999	East North Central	Windows Desktop / Laptop		I'm	not	sure		H	p	v		multiple	sex	partners		once	a	year		I	don't	know
30-44	Female	AUS	New Pap smear	No		90,000 to 119,999	South Australia	iOS Phone / Tablet		None	none	unsure		Prevention	injection	non invasive		None	dont know	unsure		Invasive	uncomfortable	vagiba		Pap	smear	vagina
18-29	Female	AUS	HPV test	Yes		0 to 29,999	New South Wales	Windows Desktop / Laptop		ultimate	great	recommended		good	reasonable	innovative		vital	essential	relevant		good	important	reliable		welcomed	innovative	relevant
45-59	Female	AUS	HPV test	No		60,000 to 89,999	Queensland	Windows Desktop / Laptop		are vaccinations good?	do they have mercury in them?	does it really work? any long term stats to prove either way?		yuck	invasive	lack of privacy		yuck	invasive (I'm sure if men had vaginas then this would be a blood test)	overwhelmingly bad		if men had vaginas this would be a blood test	yuck	not always accurate		invasion of privacy	yuck	not always done correctly
45-59	Female	AUS	New Pap smear	No		120,000 to 149,999	Victoria	Android Phone / Tablet		Safety	Future	Child		Scary	Safe	Unknown		Safe	Easy	Helps		Uncomfortable	Scary	Prevention		Unknown	Potential	Children
18-29	Female	USA	New Pap smear	Yes		0 to 9,999	Middle Atlantic	Android Phone / Tablet		hurt	quick	important		important	reliable	necessary		important	necessary	treat		hurt	pain	change		new	innovation	hope
45-59	Female	AUS	New Pap smear	No		0 to 29,999	New South Wales	iOS Phone / Tablet		Good idea	Men should have it	More dr visits		Good idea	Still need the pap smear	Another dr visit		Better than old	New technology	Viral test		Not fun	Uncomfortable	Another dr visit		Better	New	Doctor
18-29	Female	AUS	New Pap smear	No		Prefer not to answer	New South Wales	Windows Desktop / Laptop		better	needles	hurt		needle	hurt	uncomfortable		needed	uncomfortable	examination		uncomfortable	examination	hurts		improved	uncomfortable	examination
45-59	Female	AUS	New Pap smear	Yes		60,000 to 89,999	Victoria	Windows Desktop / Laptop		Teenagers	Believable	New		Impossible	Unbelievable	Misleading		Herpes	Dodgy partner	Vaccine		Uncomfortable	Dread	Unpleasant		Uncomfortable	Dread	Better
45-59	Female	AUS	New Pap smear	No		90,000 to 119,999	Victoria	Windows Desktop / Laptop		given to year 7s	prevents cancer	good		new	haven't heard of	good		new	unknown	cannot think		uncomfortable	need to do it	cannot think		new	same as before	unconfortable
60+	Female	USA	New Pap smear	No		Prefer not to answer	East South Central	Windows Desktop / Laptop		good	helpful	safe		great	helpful	gratefying		unknown	necessary	uncomfortable		necessary	nervous	uncomplicated		improvment	skilled	knowledgable
30-44	Female	USA	HPV test	Yes		100,000 to 124,999	East North Central	Windows Desktop / Laptop		Necessary	Insurance	Safe		Important	Insurance	safety		Virus	STD	Treatment		annual	necessary	important		Insurance	Important	necessary
45-59	Female	USA	New Pap smear	No		25,000 to 49,999	South Atlantic	Windows Desktop / Laptop		Side Effects	Danger	Successful		Side Effects	Danger	Cost		Unknown	Side Effects	Cost		Needed	Cancer	Uncomterble		Unknown	Insurance	Cost
18-29	Female	AUS	HPV test	Yes		0 to 29,999		Windows Desktop / Laptop		Optional	Painful	School		Unnecessary	Optional	Painful		Cancer	Vagina	Cervical		Necessary	Uncomfortable	Education		Improved	Uncomfortable	Necessary
45-59	Female	USA	New Pap smear	Yes		150,000 to 174,999	South Atlantic	Windows Desktop / Laptop		early	easy	preventative		preventative	good	easy		early	pre-cancerous	detection		important	hate	regularily		better	pre-cancerous	early
45-59	Female	AUS	New Pap smear	Yes		90,000 to 119,999	Victoria	iOS Phone / Tablet		Efficient	New	Protective		Young	Safe	Necessary		Medical	Warts	Dirty		Old	Mum	Hurt		Fast	Current	Improved
45-59	Female	USA	HPV test	No		75,000 to 99,999	East North Central	Windows Desktop / Laptop		Effective	Preventative	Most recent		painful	preventative	modern		Modern	Effective	Young		painful	antiquated	effective		New	Painful	Effective
30-44	Female	AUS	New Pap smear	No		30,000 to 59,999	South Australia	Android Phone / Tablet		Good	Reliability	Age		Effectiveness	Does it work?	Compulsory		How	How often	Reliamce		Horrible	Necessary	Girls		Changes?	How	Detection
45-59	Female	USA	HPV test	No		125,000 to 149,999	Pacific	Android Phone / Tablet		Shot	Preventative	Advancement		Shot	How is that possible	Nothing		New	Innovative	Purpose		Typical	Cold speculum	Routine		Improvement	Same procedure	Routine
30-44	Female	AUS	New Pap smear	Yes		30,000 to 59,999	Queensland	iOS Phone / Tablet		Shot	New	Good		Shot	Lifesaving	Doctor		Lab	New	Not 100%		Cold	Scratch	Doctor		Better	New	Lab
45-59	Female	USA	New Pap smear	Yes		25,000 to 49,999	New England	Android Phone / Tablet		Poison	Dangerous	Money		Pharma	Mercury	Shot		Test	Office	Doctor		Simple	Fast	Office		Test	Exam	Quick
45-59	Female	USA	New Pap smear	No		10,000 to 24,999	South Atlantic	Android Phone / Tablet		sure	alway	great		no way	preventive	kids		important	needed	preventative		safty	painful	important		ugh	yearly	do it
60+	Female	USA	New Pap smear	No		75,000 to 99,999	Middle Atlantic	iOS Phone / Tablet		Same	Vaccine	Shots		Side effects	Necessary?	Facts		What	Not me	Serious		Dr visit	Wait	Ugh		Medical	Fad	Facts?
30-44	Female	AUS	New Pap smear	No		Prefer not to answer	Queensland	Android Phone / Tablet		needle	doctor	sore		needle	sore	doctor		cancer	doctor	yuck		yuck	cold	female		doctor	great	yuck
60+	Female	USA	New Pap smear	No		50,000 to 74,999	New England	Windows Desktop / Laptop		teenagers	necessary	unneeded for me		young people	teenagers	women		unknown	when	why		necessary	yearly	reliable		all women	yearly	necessary
45-59	Female	USA	HPV test	Yes		25,000 to 49,999	West North Central	Windows Desktop / Laptop		n/a	n/a	n/a		n/a	n/a	n/a		n/a	n/a	n/a		n/a	n/a	n/a		n/a	n/a	n/a
45-59	Female	USA	HPV test	No		100,000 to 124,999	New England	Windows Desktop / Laptop		useless	ineffective	unnecessary		painful	unnecessary	difficult		awareness	effective	efficient		evil	uncomfortable	embarrasing		painful	embarassing	uncomfortable
45-59	Female	USA	New Pap smear	Yes		25,000 to 49,999	East South Central	Other		preteen	checkup	young		shot	exam	young		papsmear	healthy	annual		yearly	Dr.	Health		current	annual	security
30-44	Female	USA	New Pap smear	No		25,000 to 49,999	East North Central	Windows Desktop / Laptop		unnecessary	pushed	bad		unnecessary	bad	needless		precaution	bother	safety		unpleasant	precaution	prevention		better	similar	precaution
45-59	Female	AUS	New Pap smear	No		120,000 to 149,999	Western Australia	Windows Desktop / Laptop		fairly recent	should be freely available	necessary		good idea	prevention	necessary		early dectection	necessary	regulasr checks		uncomfortable	necessary	regular		better??	more effective	more expensive
60+	Female	USA	New Pap smear	No		100,000 to 124,999	South Atlantic	Other		shot	painful	where		serious	dangerous	sick		ill	why	causes		annually	undress	hurt		detection	feels	developed
30-44	Female	AUS	New Pap smear	No		90,000 to 119,999	Victoria	iOS Phone / Tablet		Protection	Not sure	Questionable		Uncertain	Lifesaving	New		Life saving	Precaution	New		Unpleasant	Painful	Dread		Good	Different	Uncertain
30-44	Female	USA	New Pap smear	No		25,000 to 49,999	South Atlantic	Windows Desktop / Laptop		human	papilloma	virus		women	increasing	genetic		indication	invalid	controversial		ugh	yearly	uncomfortable		ugh	necessary	evil
45-59	Female	USA	New Pap smear	No		25,000 to 49,999	East North Central	iOS Phone / Tablet		Necessary	Helpful	Protective		New	Promising	Helpful		New	Necessary	Advanced		Annual	Necessary	Helpful		Necessary	Advanced	Annual
18-29	Female	USA	New Pap smear	No		100,000 to 124,999	Pacific	Windows Desktop / Laptop		warts	needle	cure		needle	cervix	pain		warts	sharp	pain		pain	agony	speculum		new	pap	smear
45-59	Female	USA	New Pap smear	Yes		75,000 to 99,999	East North Central	Windows Desktop / Laptop		recommended	wise	needed		helpful	recommended	safe		scary	contagious	sexually transmitted		painful	embarassing	dreadful		easier	dreadful	accurate
45-59	Female	USA	New Pap smear	Yes		75,000 to 99,999	Middle Atlantic	Windows Desktop / Laptop		not for me	for sexually active	expensive		unknown	effective ?	need more info		useful	not widespread	unknown		practical	inexpensive	good practice		not enough info	unknown	questionable
45-59	Female	USA	New Pap smear	Yes		200,000 and up	New England	MacOS Desktop / Laptop		Prevention	Virus	Shot		Prevention	Cancer	Female		VD	Warts	Cancer		Awkward	Annual	Tolerate		Improved	Annual	Prevention
45-59	Female	USA	HPV test	No		100,000 to 124,999	South Atlantic	Windows Desktop / Laptop		shot	gynecologist	preventive		HPV	shot	gynecologist		blood	gynecologist	new		uncomfortable	gynecologist	speculum		improved	gynecologist	fast
45-59	Female	USA	New Pap smear	No		125,000 to 149,999	New England	Windows Desktop / Laptop		no	ideas	really		I'm	not	female		still	not	female		won't	change	gender		I'm	still	male
45-59	Female	USA	New Pap smear	Yes		100,000 to 124,999	East North Central	iOS Phone / Tablet		shot	women	young		new	need	shot		yearly	sex	exam		hurt	test	needed		safer	needed	yearly
30-44	Female	USA	New Pap smear	No		25,000 to 49,999		Android Phone / Tablet		Hazard	Effects	Importance		Questionable	Reasoning	Data		Needed	Health	Answers		Schedule	Health	Talk		Overall	Results	Information
30-44	Female	AUS	New Pap smear	No		Prefer not to answer	Queensland	Windows Desktop / Laptop		Safe	Protect	Immunisation		Coverage	Safety	Protection		Innovation	Awareness	Early detection		Essential	Awareness	Early detection		Greater protection	Early detection	Regular checks
30-44	Female	AUS	New Pap smear	Yes		Prefer not to answer	South Australia	iOS Phone / Tablet		New	Effective	Proven		Easy	Quick	Effective		New	Worthwhile	Useful		Bi-annual	Life-saving	Necessary		Easy	Up-to-date	Technology
45-59	Female	USA	New Pap smear	No		75,000 to 99,999	West South Central	Windows Desktop / Laptop		good	needed	girls		good	necessary	valuable		unknown	young	new		embarrassing	annoying	necessary		good	hopeful	needed
45-59	Female	USA	HPV test	Yes		100,000 to 124,999	New England	Windows Desktop / Laptop		undertested	dangerous	profitable		unknown	potential	chemicals		what	cancer	information		violating	overprescribed	humiliating		gross	despise	humiliating
18-29	Female	USA	HPV test	No		75,000 to 99,999	South Atlantic	Windows Desktop / Laptop		Shot	Medicinal	Disease		Effective	Preventative	Shot		Disease	Blood	Shot		Painful	Vaginal	Uncomfortable		Vaginal	Uncomfortable	Advanced
45-59	Female	AUS	HPV test	No		60,000 to 89,999	Western Australia	MacOS Desktop / Laptop		safe	needed	trusted		innovative	new	safe		new	needed	safe		regular	neede	old		safe	regular	needed
45-59	Female	USA	New Pap smear	Yes		10,000 to 24,999	West North Central	Windows Desktop / Laptop		shot	not sure	not sure		shot	help stop cancer	no idea		not sure	not sure	not sure		ugh	painful	don't like		no idea	no idea	no idea
18-29	Female	USA	New Pap smear	Yes		50,000 to 74,999	West South Central	Windows Desktop / Laptop		Sex	Vaccine	Blood		Cancer	Chemotherapy	Hair		Virus	Sex	Exam		Vagina	Cold	Uncomfortable		Exam	Vagina	Uncomfortable
30-44	Female	AUS	New Pap smear	Yes		90,000 to 119,999	Queensland	iOS Phone / Tablet		Teenager	Needle	School		Awesome	Neefle	Pap smear		Common	Sti	Cervical cancer		Ouch	Neccessary	Scrape		New	Same	Speculum
45-59	Female	AUS	HPV test	No		Prefer not to answer	Western Australia	MacOS Desktop / Laptop		life	life	life		excellent	fabulous	life		uncomfortable	life	saving		uncomfortable	embarrassing	necessary		necessary	uncomfortable	embarrassing
45-59	Female	USA	New Pap smear	No		25,000 to 49,999	Middle Atlantic	Windows Desktop / Laptop		young	girl	unsure		does	it	work		cancer	sores	dirty		scape	gyno	ouch		scrape	gyno	ouch
45-59	Female	AUS	New Pap smear	No		30,000 to 59,999	Queensland	Windows Desktop / Laptop		worthwhile	advanced	heathful		modern	helpful	desirable		lifesaving	useful	effective		necessary	embarassing	successful		updated	worthwhile	important
60+	Female	USA	HPV test	No		75,000 to 99,999	Middle Atlantic	Windows Desktop / Laptop		Best	better	good		best	good	ok		better	good	ok		best	good	ok		Better	Good	OK
60+	Female	USA	New Pap smear	No		100,000 to 124,999	New England	Windows Desktop / Laptop		good	prevention	everyone		great	cost	prevention		huh?	what?	suspicion		quick	invasive	painless		why	invasive	better?
30-44	Female	USA	HPV test	Yes		75,000 to 99,999	East North Central	iOS Phone / Tablet		Needle	Gauze	Prick		Awesome	Needle	Sister		Important	Necessary	New		Yuck	Necessary	Yearly		Legs	Cold	Table
18-29	Female	USA	New Pap smear	Yes		75,000 to 99,999	West South Central	Windows Desktop / Laptop		SHOT	PAIN	PREVENTION		PAINFUL	PREVENTATIVE	SCARY		PAINFUL	UNSURE	UNKNOW		PAINFUL	PREVENTATIVE	YEARLY		INNOVATIVE	PAINFUL	PREVENTATIVE
60+	Female	USA	New Pap smear	Yes		Prefer not to answer	South Atlantic	MacOS Desktop / Laptop		dangerous	misleading	eggs		dangerous	misleading	eggs		scary	unknown	misleading		uncomfortable	scary	quick		unknown	questionable	ignorant
45-59	Female	USA	New Pap smear	No		25,000 to 49,999	East North Central	Windows Desktop / Laptop		important	not offered enough	education		important	good vaccination	education		important	for everyone	needed		embarrassing	uncomfortable	important		uneducation	important	new
30-44	Female	USA	New Pap smear	No		0 to 9,999	West North Central	Android Phone / Tablet		shot	flu	sick		treatment	sick	why		unkown	not sure	vaginal		test	check up	pervent		better	painless	fast
30-44	Female	USA	HPV test	No		75,000 to 99,999	Middle Atlantic	Windows Desktop / Laptop		prevention	researched	concerns		shot	new	limited		disease	GYN	screening		GYN	Screening	Prevention		GYN	prevention	screening
45-59	Female	USA	New Pap smear	Yes		10,000 to 24,999	West South Central	iOS Phone / Tablet		Shot	Cancer	Resistance		Cancer	Shot	Safety		Doctor	Ob/Gyn	Dr's office		Vagina	Speculum	Ob/Gyn		Confusion	New	Why?
60+	Female	USA	New Pap smear	No		25,000 to 49,999	South Atlantic	Windows Desktop / Laptop		need	cure	feel better		death	pain	no sex		pneumonia	very sick	deadly		germs	sexual transition disease	painful		dirty	seed	first time
30-44	Female	USA	HPV test	Yes		125,000 to 149,999	New England	Windows Desktop / Laptop		Teen	Cancer Prevention	Good		Women	Prevention	Good		women	OBGYN	good		Cancer prevention	women	uncomfortable		Women	Prevention	Good
45-59	Female	USA	New Pap smear	No		Prefer not to answer	West North Central	Windows Desktop / Laptop		sex	disease	youth		shot	cancer	vaginal		needle	blood	cancer		vaginal	speculum	cancer		vaginal	speculum	swab
45-59	Female	USA	New Pap smear	No		75,000 to 99,999	West North Central	Windows Desktop / Laptop		young	girls	shot		interested	doctor	tested		doctor	exam	yearly		doctor	office	yearly		older	women	doctor
45-59	Female	USA	New Pap smear	Yes		75,000 to 99,999	East North Central	MacOS Desktop / Laptop		HIV	shot	needle		vagina	doctor	test		cancer	biology	lab		vagina	uncomfrotable	doctor		disgusting	doctor	uncomfortable
60+	Female	USA	New Pap smear	No		50,000 to 74,999	Mountain	iOS Phone / Tablet		For	The	Young		Must	Be	New		In	Addition	To		Do	Not	Like		Just	Had	One
45-59	Female	USA	HPV test	No		Prefer not to answer	East North Central	Windows Desktop / Laptop		cost	availability	yes		proven	cost	availability		yes	safe	easy		necessary	accurate?	frequency?		what	is	different
30-44	Female	USA	HPV test	No		25,000 to 49,999	Middle Atlantic	Windows Desktop / Laptop		Gardnerella	injection	needle		injection	hpv	arm		swab	scrape	speculum		swap	speculum	stirrups		swab	stirrups	speculum
60+	Female	USA	New Pap smear	Yes		150,000 to 174,999	Mountain	iOS Phone / Tablet		Good	Safe	Pinch		Good	Necessary	Safe		Good	Safe	Pinch		Smell	Exam	Pinch		Pap	Doctor	Yuck
18-29	Female	AUS	New Pap smear	No		30,000 to 59,999	Tasmania	Android Phone / Tablet		Human	Powered	Vehicle		Needle	Death	Ovaries		Never	Been	Informed		Uncomfortable	Awkward	Necessary		Never	Been	Informed
45-59	Female	AUS	New Pap smear	No		30,000 to 59,999	Victoria	Windows Desktop / Laptop		injection	Herpes	Healthy		Injection	Hurts	Healthy		Herpes	Healthy	Necessary		Cervical cancer	Uncomfortable	Invasive		Cervical cancer	Invasive	Uncomfortable
60+	Female	USA	HPV test	No		25,000 to 49,999	Middle Atlantic	Windows Desktop / Laptop		Quick	Painless	Require		Necesssary	Easy	Required		Teenagers	Important	Early		Painful	Invasive	Needed		Improved	Important	Necessary
45-59	Female	USA	HPV test	No		25,000 to 49,999	New England	Windows Desktop / Laptop		why	am I	repeating		there is	no such	thing		poor	survey	makeup		yearly	protection	painful		yearly	painful	obligation
45-59	Female	USA	HPV test	No		50,000 to 74,999	Pacific	Windows Desktop / Laptop		shot	fast	needed		Please	find	cure		early	detection	easy		yuk	messy	swab		new	helps	women
45-59	Female	USA	New Pap smear	No		100,000 to 124,999	West North Central	Windows Desktop / Laptop		pain	shot	avoid		requirement	need	safety		confusion	wonder	random		pressure	anxiety	vagina		pressure	confidence	vagina
18-29	Female	AUS	New Pap smear	No		30,000 to 59,999	Queensland	iOS Phone / Tablet		Help	Fix	Human		Cervical	Cancer	Vaccination		Cervical	Sexual	Deseise		Vagina	Clamp	Alligator		New	Pap	Smear
45-59	Female	USA	New Pap smear	Yes		0 to 9,999	East North Central	iOS Phone / Tablet		Human	Pap	Virus		Injection	Pap	Disease		Human	Pap	Female		Female	Vagina	Gynecology		Cervix	Vagina	Pubic bone
18-29	Female	USA	HPV test	No		25,000 to 49,999	Pacific	Android Phone / Tablet		Antibodies	Shot	Artificial active immunization		Titers	Anyibodies	Shot		Disgnostic	New	Multi-use		Speculum	Doctor	Lithotomy		Diagnostic	New	Examination
45-59	Female	AUS	HPV test	Yes		180,000 or more	Western Australia	Windows Desktop / Laptop		Youth	Cancer	Prevention		youth	cancer	preventative		detection	cancer	preventative		detection	uncomfortable	cancer		detection	early	cancer
60+	Female	USA	HPV test	No		100,000 to 124,999	Pacific	iOS Phone / Tablet		Dangerous	Paralysis	Unethical		Malpractice	Unhealhy	Unnecessary		Safe	Helpful	Wise		Needed	Informative	Proactive		Better	Necessary	Progressive
30-44	Female	AUS	HPV test	Yes			New South Wales	iOS Phone / Tablet		Brilliant	Survival	Vital		Essential	Vital	Future		Hope	Preventative	Finally		Anxiety	Depression	Pain		Hopeful	Cost	Too late
18-29	Female	USA	New Pap smear	No		75,000 to 99,999	New England	Windows Desktop / Laptop		shot	don't mind shots	needed		good	helpful	against cancer		HPV	I don't know what this is	I'm too young		uncomfortable	a lot of women dislike it	never had one, too young		updated	not uncomfortable	better
45-59	Female	USA	New Pap smear	No		10,000 to 24,999	East North Central	Android Phone / Tablet		No	No	No		No	No	No		Noo	No	No		Yes	Yes	Yes		Yes	Yes	Yes
30-44	Female	USA	New Pap smear	Yes		25,000 to 49,999	East South Central	Windows Desktop / Laptop		protective	preventative	shot		preventative	protective	young		uncomfortable	necessary	gynecologist		discomfort	worthwhile	short		improved	progress	uncertain
45-59	Female	USA	New Pap smear	No		25,000 to 49,999	West North Central	Windows Desktop / Laptop		no way	never	sleazy		no way	no vaccines	abstain		disgusting	uncomfortable	gross		gross	uncomfortable	false-positives		uncomfortable	many false-positives	necessary
45-59	Female	USA	HPV test	Yes		25,000 to 49,999	East North Central	Windows Desktop / Laptop		cool	expensive	unavailable		cool	unavailable	expensive		necessary	responsible	yucky		yucky	embarrassing	inconvenient		ok	embarrassing	yucky
45-59	Female	USA	New Pap smear	No		10,000 to 24,999		MacOS Desktop / Laptop		vaccination	Cancer	health		health	doctor	danger		test	virus	hospital		cancer	exam	health		cancer	danger	health
45-59	Female	USA	HPV test	No		50,000 to 74,999	East North Central	Windows Desktop / Laptop		new	hope	future		hopeful	needed	health		cancer	screening	health		uncomfortable	necessary	cancer		cancer	uncomfortable	health
45-59	Female	USA	HPV test	No		Prefer not to answer	East South Central	Windows Desktop / Laptop		nosure	new	unknown		new	unknown	hopefull		good	helpfull	needful		urgh	painful	sometime usefull		test	embarrasing	painful
30-44	Female	USA	New Pap smear	No		75,000 to 99,999	West South Central	Windows Desktop / Laptop		hype	not serious	not necessary		need	very serious	treatable		reasons	for	monogomy		needed	painful	necessary		uninformed	differences	reasons better?
18-29	Female	USA	New Pap smear	Yes		25,000 to 49,999	East North Central	Windows Desktop / Laptop		Good	Prevention	Help		Needle	Good	Prevention		Cut	Cervix	Exam		Speculum	Cold	Exam		New	Exam	Doctor
45-59	Female	USA	New Pap smear	No		175,000 to 199,999	West South Central	Windows Desktop / Laptop		unknown	unsure	easier		precise	new	unsure		unknown	unsure	confused		precaution	preventive	proactive		preventive	precaution	newer
18-29	Female	USA	New Pap smear	Yes		25,000 to 49,999	West South Central	Android Phone / Tablet		Cervical	Prevent	Cancer		Prevent	Everyone	Yes!		Test?	Why	Confusing		Regular	Reputation	Normal		Helpful	Prevent	New?
18-29	Female	USA	HPV test	No		Prefer not to answer	Pacific	iOS Phone / Tablet		HIV	doctor	people		violin	doctor	bad		flower	HIV	weird		grandpa	paint	weird		grandpa	paint	old
60+	Female	USA	New Pap smear	No		Prefer not to answer	East North Central	Windows Desktop / Laptop		prevention	worthwhile	easy		prevention	worthwhile	easy		preventative	precautionary	safe		painless	necessary	preventative		painless	necessary	preventative
45-59	Female	USA	New Pap smear	No		75,000 to 99,999	Middle Atlantic	Windows Desktop / Laptop		New	Unsure	Uninformed		Good	Helpful	Worthwhile		New	Untested	Unsure		Essential	Life-Saving	Good		Good	Worthwhile	Doable
45-59	Female	USA	HPV test	Yes		25,000 to 49,999	West North Central	Android Phone / Tablet		Needed	Wanted	Important		Important	Needed	Mandatory		Important	Necessary	Wanted		Yuk	Unwanted	Unnecessary		Embarrassing	Dreaded	Uncomfortable
45-59	Female	AUS	HPV test	No		Prefer not to answer	Western Australia	iOS Phone / Tablet		Antivirus	Vaccination	Updated		Female	Cancerous	Antivirus		Current	Effective	Proactive		Older	Common	Ineffective		Uptodate	Cervical	Detection
45-59	Female	AUS	New Pap smear	No		120,000 to 149,999	New South Wales	iOS Phone / Tablet		Great	New	Longevity		Great	How	When		Unsure	Unknown	Modern		Embarrassing	Necessary	Painful		Reliable	Regular	Popular
30-44	Female	USA	HPV test	No		Prefer not to answer	West South Central	Android Phone / Tablet		treatment	medicine	std		diease	pain	treatment		std	treatment	cure		produce	ovary	cells		treatment	cells	diease
30-44	Female	USA	New Pap smear	No		25,000 to 49,999	South Atlantic	Windows Desktop / Laptop		herpes	virus	disease		cancer	cervix	transmitted		human	papilloma	virus		pap	smear	disease		vagina	virus	disease
60+	Female	USA	HPV test	Yes		Prefer not to answer	Middle Atlantic	MacOS Desktop / Laptop		Human	papaloma	virus		C	c	v		H	P	V		Pap	smear	test		N	P	s
45-59	Female	USA	HPV test	No		150,000 to 174,999	West South Central	iOS Phone / Tablet		Prevention	Comprehensive	Teenager		Improvement	Gynecologist	Necessary?		Vaccination	Sexually transmitted	Cervical cancer		Necessary	Uncomfortable	Prevention		Better	Insurance	Prevention
45-59	Female	USA	HPV test	No		75,000 to 99,999	East North Central	iOS Phone / Tablet		Painful	Shots	3		Ouch	Shots	Once		Unknown	Hopeful	Curious		Awkward	Cold	Dreaded		Typical	Yearly	Confidence
60+	Female	USA	HPV test	No		Prefer not to answer	South Atlantic	Windows Desktop / Laptop		Early Cancer	Prevention	Injection		Injection	Preventative	Cancer cells		Vaginal exam performed much like pap smear	Looking for virus that could lead to cancer	Newest method to detect early cancer cells		Original testing for cervical cancer	Vaginal exam	Early detection by checking cells		Improved Testing	Vaginal Exam	Checking for early cancer cells
45-59	Female	USA	New Pap smear	Yes		50,000 to 74,999	South Atlantic	Windows Desktop / Laptop		human	papiloma	virus		prevention	sex	teenagers		genital	sex	vaccine		uncomfortable	necessary	annual		same	doctor	scrape
60+	Female	USA	New Pap smear	No		75,000 to 99,999	West South Central	Windows Desktop / Laptop		herpes	contagous	pervention		needed	prevention	painful		important	needed	pervention		needed	prevention	important		needed	diagositic	prevention
45-59	Female	USA	New Pap smear	Yes		25,000 to 49,999	Mountain	Android Phone / Tablet		Shot	Safety	Unhappy		Painful	Not sure	Had cervical Cancer		Painful	Dirty	Cancer		Uncomfortable	Gross	None		Don't	Once every	Six months
60+	Female	USA	New Pap smear	No		Prefer not to answer	Middle Atlantic	Windows Desktop / Laptop		new	puberty	repeat		new	precautionary	costly		new	precautionary	yearly		gynecologist	precautionary	required		new	better	yearly
45-59	Female	USA	HPV test	No		Prefer not to answer	East North Central	iOS Phone / Tablet		Disease	Sexually	Transmitted		Great	Cure	Chemo		Vagina	Disease	Sex		Vaginal	Test	Doctor		Improvement	Doctor	Lab
45-59	Female	AUS	New Pap smear	No		90,000 to 119,999	Western Australia	iOS Phone / Tablet		Cervix	Cancer	Sex		Unfair	Agest	Revolutionary		Youngsters	Sexual	Men		Pain	Embarrassment	Necessary		Accurate	Efficient	Scientific
60+	Female	USA	New Pap smear	Yes		25,000 to 49,999	New England	Windows Desktop / Laptop		didn't	know	about		didn't	know	about		should	be	tested		detect	cervical	cancer		detect	cervical	cancer
45-59	Female	USA	New Pap smear	No		50,000 to 74,999	East North Central	MacOS Desktop / Laptop		virus	transmitted	disease		safe	smart	healthy		transmitted	intercourse	youth		speculum	discomfort	cold		safe	test	secure
30-44	Female	USA	HPV test	No		10,000 to 24,999	South Atlantic	Android Phone / Tablet		For young girls	Smart	Avoids issues		Unbelievable	Expensive	Probably covered by insurance		Hard to test for	Std test	Worrisome		Yearly	Covered by insurance	Pinches		Needed	Probably expensive	Pinches
60+	Female	USA	New Pap smear	No		Prefer not to answer	Middle Atlantic	Windows Desktop / Laptop		okay	same as other	one for kids?		kids	series	wonder		okay	whatever	same time as physical?		yearly	uncomfortable	painful		okay	question difference	same as other
45-59	Female	USA	New Pap smear	Yes		125,000 to 149,999	West South Central	iOS Phone / Tablet		Multiple shots	Scheduling	Needle		New	Shot	Really?		Dr wells	Speculum	Drape		Cold metal	Dr Wells	Drape		Why	Whats dfferent	Ok
60+	Female	USA	HPV test	Yes		75,000 to 99,999	South Atlantic	Windows Desktop / Laptop		young women	covered by insurance	new		worthwhile	hopeful	breakthrough		new technology	insurance coverage?	preventive		uncomfortable	old technology	universal		uncertain	similar to old smear	insurance coverage
45-59	Female	USA	New Pap smear	Yes		75,000 to 99,999		iOS Phone / Tablet		Expensive	Important	Insurance		Important	Expensive	Young		Young	Youth	Girls		Cold	Uncomfortable	Yuck		Cold	Uncomfortable	Insurance
18-29	Female	USA	New Pap smear	No		50,000 to 74,999	Middle Atlantic	Windows Desktop / Laptop		non-invasive	shot	good		hurt	Gaurdasil	unnecessary		unneccessary	bad	invasive		invasive	uncomfortable	neccessary		easier	better	medical
18-29	Female	USA	HPV test	No		0 to 9,999	South Atlantic	Android Phone / Tablet		H	P	V		Cervical	Cancer	Vaccinations		Human	Papilloma	Virus		New	Pap	Smear		New	Pap	Smear
45-59	Female	USA	New Pap smear	No		25,000 to 49,999	West South Central	Windows Desktop / Laptop		teenage	valuable	cervix		good	controversy	teenage		teenage	cancer	STD		woman	annual	pain		better	made-up	New Scotland Yard
18-29	Female	USA	HPV test	Yes		10,000 to 24,999	New England	Android Phone / Tablet		injection	tests	exam		test	pap	exam		injection	examination	tests		examination	tests	vagina		cancer	examination	test
30-44	Female	USA	New Pap smear	No		0 to 9,999	East South Central	Windows Desktop / Laptop		doctor	shot	weeks		shot	pap	meds		swab	mouth	paper		embarrasing	clamps	nervious		camera	technolegy	t.v.
18-29	Female	USA	New Pap smear	No		100,000 to 124,999	Middle Atlantic	Android Phone / Tablet		New	Confused	Effects		Skeptical	Side-effects	Pain		Unsure	Why	Young		Traditional	Necessary	Protection		Better	Accurate	Simple
30-44	Female	USA	HPV test	Yes		100,000 to 124,999	East South Central	Windows Desktop / Laptop		vaccination	helpful	important		teens	contriversial	good		New	Cancer	Exam		doctor	uncomfortable	necessary		New	Exam	Uncomfortable
45-59	Female	USA	New Pap smear	No		125,000 to 149,999	South Atlantic	Windows Desktop / Laptop		clueless	covered	data		clueless	covered	insurance		confusing	cancer	safety		annual	quick	healthy		open	data	covered
18-29	Female	USA	New Pap smear	No		25,000 to 49,999	West South Central	MacOS Desktop / Laptop		Condom	Smart	College		Precausion	Safer	Careful		Everyone	80%	Unexpectant		Must	Birthcontrol	Nervous		Change	Innovative	21stcentury
18-29	Female	USA	New Pap smear	Yes		0 to 9,999	East North Central	iOS Phone / Tablet		Prevention	Not all types of hpv	For all		Prevention	Little knowledge	Should be taught to masses		Good	Pap smear>hpv test?	Little knowledge		Good	Detection	Little knowledge		Seems legit	More conclusive than hpv test?	I have little knowledge on it
45-59	Female	USA	New Pap smear	Yes		10,000 to 24,999	South Atlantic	Windows Desktop / Laptop		necessary	smart	no brainer		wow	interesting	curious		wart	shame	dirty		crucial	uncomfortable	dreaded		where	when	yes
18-29	Female	USA	New Pap smear	Yes		150,000 to 174,999	South Atlantic	MacOS Desktop / Laptop		three	shots	oneless		same	as	HPV?		unsure	alreadyvaccinated	unncessessary		ouch	awkward	nervous		ouch	awkward	morenervous
18-29	Female	USA	New Pap smear	Yes		Prefer not to answer	East North Central	Windows Desktop / Laptop		Shot	Cancer	STD		hpv	Shot	sex		STD	Screen	Cancer		Test	Screen	Check		Test	Screen	Check
45-59	Female	AUS	New Pap smear	No		30,000 to 59,999	Victoria	Windows Desktop / Laptop		pap smear	cold device	results		pap smear	pain	results		don't know	don't know	don't know		dry	pain	results		don't know	don't know	don't know
30-44	Female	USA	New Pap smear	Yes		Prefer not to answer	East South Central	MacOS Desktop / Laptop		good	safe	useful		good	useful	safe		good	useful	safe		important	useful	safe		effective	new	safe
45-59	Female	USA	New Pap smear	No		25,000 to 49,999	West South Central	Windows Desktop / Laptop		no	unknown	curious		unsure	research	unknowledgeable		transmitted	scary	unsure		mandatory	preventive	uncomfortable		curious	easy	interested
30-44	Female	USA	New Pap smear	No		10,000 to 24,999	West North Central	Windows Desktop / Laptop		precise	important	necessary		precautionary	important	good		important	innovative	precise		uncomfortable	important	scary		innovative	important	accurate
18-29	Female	USA	New Pap smear	Yes		50,000 to 74,999	South Atlantic	Windows Desktop / Laptop		immune	shots	doctor		cancer	injections	variety		warts	deadly	genital		prevention	cancer	smear		screening	annual	butter
30-44	Female	USA	New Pap smear	Yes		10,000 to 24,999	East North Central	Windows Desktop / Laptop		no	no	yes		shot	medication	vacsine		negative	positve	na		yes	yes	yes		good	good	good
45-59	Female	USA	New Pap smear	No		25,000 to 49,999	South Atlantic	Android Phone / Tablet		Accessible	Beneficial	Vital		Necessary	Vital	Beneficial		Incurable	Serious	Contagious		Uncomfortable	Necessary	Informative		Necessary	Important	Inviting
30-44	Female	USA	New Pap smear	No		50,000 to 74,999	Pacific	Android Phone / Tablet		STD	Shot	Pre-teen		HPV	Shot	Medicine		Medical	STD	Incurable		Test	Doctor	Cervix		Cervix	Doctor	Test
18-29	Female	USA	New Pap smear	No		50,000 to 74,999	East North Central	Windows Desktop / Laptop		Needles	scary	required		Shots	Female	Scary		Doctor	Test	gyno		Vag	Gyno	Pregnant		New	Better	gyno
18-29	Female	USA	New Pap smear	No		0 to 9,999	West North Central	Android Phone / Tablet		Std	Vet	Child		Scary	Hospital	Nightmare		Std	Cat	Children		Vagina	Cold	Awkward		Awkward	Scary	Safe
45-59	Female	USA	New Pap smear	No		50,000 to 74,999	South Atlantic	iOS Phone / Tablet		No	To new	More info		Risky	No gaurantee	Harm		Sure	Accuracy?	More info		Yes	Unconfortable	Necessary		More info	How?	Clinical studies
45-59	Female	USA	New Pap smear	No		10,000 to 24,999	West South Central	Windows Desktop / Laptop		Quick	painless	accurate		Quick	painless	Accurate		Quick	painless	accurate		quick	painless	accurate		quick	painless	accurate
30-44	Female	USA	HPV test	No		100,000 to 124,999	Middle Atlantic	Windows Desktop / Laptop		Necessary	Preventative	Smart		Necessary	Solution	Helpful		Necessary	Smart	Helpful		Uncomfortable	Necessary	Painful		Innovative	Reliable	Uncomfortable
45-59	Female	USA	HPV test	No		50,000 to 74,999	South Atlantic	Windows Desktop / Laptop		no	young	shot		no	statistic	study		better	new	thorough		uncomfortable	routine	woman		good	new	practical
30-44	Female	USA	HPV test	No		175,000 to 199,999	Middle Atlantic	Windows Desktop / Laptop		teenager	prevention	cancer		exam	prevention	test		exam	prevention	action		test	uncomfortable	prevention		prevention	current	test
30-44	Female	USA	New Pap smear	Yes		75,000 to 99,999	Pacific	Windows Desktop / Laptop		prevent	STD	cancer		prevention	early	detection		screening	detection	cancer		annual	prevention	doctor		how	different	why
18-29	Female	USA	New Pap smear	Yes		50,000 to 74,999	South Atlantic	Android Phone / Tablet		shot	medicine	warts		shot	medicine	cells		swab	check	warts		pain	scrape	pink		speculum	scrape	pain
30-44	Female	USA	New Pap smear	Yes		50,000 to 74,999	Mountain	Android Phone / Tablet		Shot	Prevention	Young		HPV	Shot	Prevention		Additional	Helpful	Not comprehensive		Pain	Annoying	Yearly		Question	Specificity	Research
45-59	Female	USA	New Pap smear	Yes		50,000 to 74,999	East South Central	Windows Desktop / Laptop		No	Don't	Need		Maybe	Real?	Necessary?		Unnesssary	STD	Gross		painful	gross	useless		interested	hopeful	better?
30-44	Female	USA	New Pap smear	No		175,000 to 199,999	New England	iOS Phone / Tablet		Shot	Pre cancerous	Tests		Pap smear	Test	Shot		Cancer	Pap	Doctor		Cervical cancer	Test	Doctor		Pre	Cancer	Test
45-59	Female	USA	New Pap smear	No		75,000 to 99,999	West North Central	Windows Desktop / Laptop		shot	ouch	cancer		cancer	woman	need		women	cancer	uterus		ouch	cancer	doctor		cancer	good	ouch
18-29	Female	USA	HPV test	No		25,000 to 49,999	South Atlantic	Windows Desktop / Laptop		shot	needle	sharp		pain	vaccine	cancer		butterfly	helpful	STD		swab	awkward	glove		old	same	vagina
45-59	Female	USA	HPV test	No		25,000 to 49,999	East South Central	Windows Desktop / Laptop		affordable	necessary	available		necessary	available	affordable		necessary	affordable	available		necessary	available	affordable		available	necessary	affordable
45-59	Female	USA	HPV test	No		25,000 to 49,999	Middle Atlantic	MacOS Desktop / Laptop		help	prevent	cautious		awesome	helpful	preventative		definitely	knowledge	responsible		hurts	outdated	old		awesome	preventative	easy
45-59	Female	USA	New Pap smear	No		50,000 to 74,999	Mountain	Windows Desktop / Laptop		misunderstood	important	overlooked		great	important	misunderstood		new	missed	lifesaving		important	uncomfortable	avoided		good	easy	accurate
45-59	Female	AUS	HPV test	Yes		30,000 to 59,999	Victoria	MacOS Desktop / Laptop		girls	useful	ouch		excellent	when	cost		uncomfortable	diagnostic	necessary		uncomfortable	undignified	necessary		inconvenient	uncomfortable	necessary
45-59	Female	USA	HPV test	No		75,000 to 99,999	East North Central	Windows Desktop / Laptop		maybe same	dont remember	??		dont know	dont know	dont know		dont remember	?	?		uncomfortable	sometimes have to re do	painful at times		my results were fine	fine	fine
45-59	Female	USA	HPV test	Yes		Prefer not to answer	Middle Atlantic	Other		date	time	screenings		type	screenings	date		type	screenings	date		type	screenings	date		type	screenings	date
45-59	Female	USA	New Pap smear	Yes		Prefer not to answer	Mountain	Windows Desktop / Laptop		young	new	necessary		young	new	necessary		virus	communicable	innoculation		cervical	cancer	test		cervical	cancer	test
30-44	Female	USA	New Pap smear	Yes		Prefer not to answer	East North Central	iOS Phone / Tablet		None	None	None		None	None	None		Bad	Scary	Contagious		Necessary	Fast	Useful		None	None	None
30-44	Female	USA	New Pap smear	Yes		125,000 to 149,999	West South Central	Windows Desktop / Laptop		girls	virus	sex		new	painless	easy		sex	girl	annual		annual	normal	effective		different	normal	easy
18-29	Female	USA	New Pap smear	Yes		25,000 to 49,999	West South Central	Windows Desktop / Laptop		deat	scared	body		death	controlled	scared		disease	death	scared		Cancer	Scared	Death		scared	clear	safe
18-29	Female	USA	HPV test	No		50,000 to 74,999	West South Central	Windows Desktop / Laptop		Preventive	cancer	precaution		preventive	cure	resloution		preventive	cautious	cancer		Check up	yearly	preventive		up to date	reassurance	precaution
45-59	Female	USA	New Pap smear	Yes		50,000 to 74,999	East North Central	Windows Desktop / Laptop		useful	easy	required		easy	helpful	required		contagious	cancer	death		yearly	female	needed		yearly	easy	cautious
45-59	Female	USA	HPV test	Yes		100,000 to 124,999	East North Central	Windows Desktop / Laptop		too	old	vaccine		prevention	of	cancer		exposure	to	disease		not	much	fun		less	cancer	future
45-59	Female	USA	New Pap smear	No		175,000 to 199,999	South Atlantic	Windows Desktop / Laptop		virus	unsure	prevent		danger	shot	cancer		wary	virus	test		safety	test	annual		test	preventative	annual
45-59	Female	USA	HPV test	No		75,000 to 99,999	South Atlantic	Windows Desktop / Laptop		STD	prevention	shot		prevention	shot	cancer		STD	test	screening		test	cancer	screening		swab	cancer	test
18-29	Female	USA	HPV test	No		25,000 to 49,999	East South Central	Windows Desktop / Laptop		?	?	?		doing	a	disservice to public health		what	the	hell		not	well w	written		this	survey	sucks
30-44	Female	USA	HPV test	No		75,000 to 99,999	East North Central	iOS Phone / Tablet		Groundbreaking	Great	Necessary		Useful	Necessary	Awesome		Useful	Necessary	Relevant		Dread	Anxious	Nervous		Useful	Nervous	Needed
45-59	Female	USA	New Pap smear	No		75,000 to 99,999	Pacific	Windows Desktop / Laptop		needed	needle	cancer prevention		hope	need	must have		scary	needed	cancer		test	intrusive	cancer		test	cancer	health
45-59	Female	USA	New Pap smear	No		75,000 to 99,999	South Atlantic	Windows Desktop / Laptop		shot	aids	shot		shot	disease	alarm		aids	questions	questions		vaginal	annual	invasive		modern	customary	gynocologist
30-44	Female	USA	New Pap smear	Yes		100,000 to 124,999	Pacific	Android Phone / Tablet		Good	Preventative	For minors controversial		Never heard "term"	Clinical	Sounds better than hpv		Sounds dirty	Associate with std	Cancer scare		Routine preventative care	Sounds gross actually	Something you don't mention in public		New	Improved	Innovative
45-59	Female	USA	New Pap smear	No		10,000 to 24,999	New England	Windows Desktop / Laptop		pain	needed	prevention		needed	important	required		cancer	virus	worry		needed	required	prevention		better	required	prevention
45-59	Female	USA	New Pap smear	Yes		100,000 to 124,999	New England	Windows Desktop / Laptop		lifesaving	important	should vaccainate		lifesaving	important	want		important	life saving	screen precancerous		cancer screening	lifesaving	important		better	safer	livesaving
45-59	Female	USA	New Pap smear	No		200,000 and up	Mountain	Windows Desktop / Laptop		virus	need	STD		Available	Needed	Appointment		Need	Appointment	Repeat		routine	needed	hate		Great	Double	Thanks
18-29	Female	USA	New Pap smear	Yes		125,000 to 149,999	Mountain	iOS Phone / Tablet		Miracle	Aids	Safe		Safe	Good	Painful		Aids	Sick	Ill		Vaginal	Doctor	Uncomfortable		Vagina	Uncomfortable	Cancer
18-29	Female	USA	New Pap smear	No		10,000 to 24,999	Mountain	iOS Phone / Tablet		G	D	D		Helpful	Protect	Vagina		Boo	gross	AGoodThingToGet		SexuallyActive	Yearly	Helpful		?	?	?
45-59	Female	USA	New Pap smear	Yes		75,000 to 99,999	Middle Atlantic	Windows Desktop / Laptop		unknown	painful	side-effects		painful	unknown	appointment		uncomfortable	embarassing	painful		uncomfortable	embarassing	painful		uncomfortable	embarassing	painful
45-59	Female	USA	New Pap smear	Yes		75,000 to 99,999	South Atlantic	Windows Desktop / Laptop		youth	autism	unproven		teens	unnecessary	costly		young	costly	teens		exam	scary	older		productive	interesting	maybe
18-29	Female	USA	New Pap smear	Yes		Prefer not to answer	East North Central	Other		good	helps you be healthy	needles		cancer is bad	cancer	good		good	gross	cool		medical	smeary	pappy		newer	better	pappier
45-59	Female	USA	New Pap smear	Yes		50,000 to 74,999	West South Central	Windows Desktop / Laptop		unknown	unknown	unknown		unknown	unknown	unknown		unknown	unknown	unknown		embarassing	painful	messy		unknown	unknown	unknown
45-59	Female	USA	New Pap smear	No		150,000 to 174,999	South Atlantic	Windows Desktop / Laptop		new	safe	good		wonderful	like	easy		new	interesting	questions		uncomfortable	spotting	cringe		uncomfortable	spotting	hurts
45-59	Female	USA	New Pap smear	No		50,000 to 74,999	West North Central	MacOS Desktop / Laptop		shot	newer	?		shot	preventative	?		preventative	?	?		test	vaginal	once/year		need	yearly	preventative
45-59	Female	USA	HPV test	No		200,000 and up	Pacific	iOS Phone / Tablet		New	Young girls should get it	Controversial		Good	Smart	Important		New	Controversial	Good for uoung girls		Annual	Important	Cold speculum		Unfamiliar	Improved	Important
30-44	Female	USA	New Pap smear	No		75,000 to 99,999	New England	Windows Desktop / Laptop		precautious	new	painful		precautious	painful	new		modern	safe	informative		traditional	uncomfortable	informative		modern	uncomfortable	informative
18-29	Female	USA	HPV test	No		10,000 to 24,999	East South Central	Windows Desktop / Laptop		painful	side effect	prevention		required	important	prevention		important	quick	prevention		uncomfortable	important	prevention		uncomfortable	important	safe
45-59	Female	USA	New Pap smear	No		50,000 to 74,999	Middle Atlantic	Windows Desktop / Laptop		wise	needed	precaution		important	free	necessary		teenagers	controversy	test		annoying	necessary	precaution		helpful	annoying	necessary
45-59	Female	USA	New Pap smear	No		25,000 to 49,999	Mountain	Android Phone / Tablet		Std	Herpes	Vaccine		Unsure	Downside	Risks		Std	Vaccine	Youth		Uncomfortable	Invasive	Embarrassing		Uncomfortable	Invasive	Embarrassing
30-44	Female	USA	New Pap smear	Yes		75,000 to 99,999	East North Central	MacOS Desktop / Laptop		preventative	easy	improvement		preventative	helpful	improving		preventative	detection	monitoring		dislike	necessary	too-frequent		better	early	accurate
30-44	Female	USA	HPV test	Yes		200,000 and up	Pacific	iOS Phone / Tablet		Cancer	Shot	Prevent		Hpv	Shot	Prevent		Cancer	Doctor	Vaccine		Uncomfortable	Cancer	Cervix		Same	Uncomfortable	Cancer
45-59	Female	USA	HPV test	Yes		50,000 to 74,999	East South Central	Windows Desktop / Laptop		virus	STD	shot		shot	teens	HPV		STD	teens	cancer		OBGYN	exam	scrape		Obgyn	exam	scrape
18-29	Female	USA	New Pap smear	No		50,000 to 74,999	East North Central	Windows Desktop / Laptop		NA	NA	NA		NA	NA	NA		NA	NA	NA		NA	NA	NA		NA	NA	NA
18-29	Female	USA	New Pap smear	Yes		10,000 to 24,999	West North Central	Windows Desktop / Laptop		good	helpful	lifesaver		hopeful	yay	breakthrough		needed	important	good		important	uncomfortable	needed		hopeful	revolutionary	updated
45-59	Female	USA	New Pap smear	No		150,000 to 174,999	West South Central	Windows Desktop / Laptop		cancer	vaccination	prevention		cancer	vaccine	prevention		hpv	cancer	test		cancer	screening	test		pap	cancer	test
18-29	Female	USA	HPV test	No		0 to 9,999	South Atlantic	Android Phone / Tablet		different	unique	humane		Scary	Frightening	worried		different	safe	hamne		same	indifferent	ordinary		different	unique	human
18-29	Female	USA	New Pap smear	Yes		25,000 to 49,999	West South Central	Windows Desktop / Laptop		shot	preventative	stings		HPV	shot	sting		blood test	pap smear	std		uncomfortable	necessary	dreaded		what is a "New"?	uncomfortable	annoying
30-44	Female	USA	New Pap smear	No		25,000 to 49,999	West North Central	Android Phone / Tablet		protect against diseases	shot	a few shots		hysterectomy	runs in my family	chemotherapy/radiation		done at my doctor office	Can spread	treatable		normal yearly appointment	done at my local Dr.s office	Appointment is usually quick		Quick	results faster	Still done at local Dr.s office
45-59	Female	USA	HPV test	Yes		25,000 to 49,999	West North Central	Windows Desktop / Laptop		protection	safety	security		preventive	necessary	self-care		knowledge	power	protective		self-care	proactive	safety		accuracy	knowledge	power
45-59	Female	USA	New Pap smear	Yes		100,000 to 124,999	South Atlantic	Windows Desktop / Laptop		shot	female	young		innovative	necessary	great		sex	carrier	men		uncomfortable	embarrasing	necessary		uneducated	necessary	work
30-44	Female	USA	HPV test	Yes		50,000 to 74,999	West North Central	Windows Desktop / Laptop		young	girls	teenagers		preventative	young	teenagers		cancer	preventative	warts		uncomfortable	speculum	yearly		technology	cancer	innovation
30-44	Female	USA	New Pap smear	Yes		50,000 to 74,999	Pacific	iOS Phone / Tablet		No	No	No		No	No	No		Negative	Negative	Negative		Negative pap	No hpv found	Negative on all STD		HPV	Std	Aids
45-59	Female	USA	New Pap smear	No		200,000 and up	Mountain	MacOS Desktop / Laptop		same as cervical vacc	good to get if you haven't had sex yet	for both men and women		hpv vaccination	for both sexes	good to get if you haven't had sex yet		yearly	necessary	prudent		obsolete	out of date	older		yearly	necessary	prudent
45-59	Female	USA	New Pap smear	No		Prefer not to answer	West South Central	Windows Desktop / Laptop		prevention	health	safe		prevention	health	necessary		health	prevention	detection		prevention	detection	health		prevention	health	thorough
45-59	Female	USA	New Pap smear	No		25,000 to 49,999	Pacific	Windows Desktop / Laptop		teens	sad	sexual		good	possibly	smart		sexually	transmitted	disease		ok	smart	either		good	either	ok
30-44	Female	USA	New Pap smear	Yes		10,000 to 24,999	East South Central	Windows Desktop / Laptop		hello	hi	hello		tyu	tyui	yui		fyt	yu	ui		yu	uyi	yu		hi	hi	hio
45-59	Female	USA	New Pap smear	No		150,000 to 174,999	Pacific	Windows Desktop / Laptop		New	Untested	Wary		Untried	New	Wary		Unfamiliar	Vague	Wary		Painful	Results	Unpleasant		Unknown	Wary	Questionable
18-29	Female	USA	New Pap smear	No		150,000 to 174,999	South Atlantic	MacOS Desktop / Laptop		painful	three times	good		scary	helpful	painful		3 shots	never taken it	scary		annoying	yearly	helpful		metal	scary	hurts
45-59	Female	USA	HPV test	No		25,000 to 49,999	Middle Atlantic	Windows Desktop / Laptop		shot	prevention	good		what	new	great		prevention	teenagers	cancer		yearly	painful	cancer		prevention	cancer	longer
45-59	Female	USA	New Pap smear	No		25,000 to 49,999	East North Central	Windows Desktop / Laptop		PROTECTION	WARTS	Human Papilloma virus		Have	not	heard of		Warts	cancer	STD		negative	HPV	cancer		CERVICAL	CANCER	TEST
45-59	Female	USA	New Pap smear	No		50,000 to 74,999	Pacific	Windows Desktop / Laptop		step	right	direction		i	would	use		good	teenager	test		hate	this	yearly		definately	worth	doing
18-29	Female	USA	New Pap smear	Yes		50,000 to 74,999	Mountain	Android Phone / Tablet		Easy	Hurt	Smart		Ouch	Scary	Sex		Uncomfortable	Awkward	Life-saving		Doctor	Yuck	Pain		Innovative	Better	Quick
45-59	Female	USA	New Pap smear	Yes		125,000 to 149,999	West North Central	Windows Desktop / Laptop		ok	ok	ok		ok	ok	ok		ok	ok	ok		ok	ok	ok		ok	ok	ok
45-59	Female	USA	New Pap smear	No		50,000 to 74,999	South Atlantic	Other		ignorance	relevance	breakthrough		unknown	ignorance	relevance		question	std	how		yuck	necessary	messy		when	ignorance	how
45-59	Female	USA	New Pap smear	No		75,000 to 99,999	West South Central	Windows Desktop / Laptop		shot	hurt	prevention		prevention	hospital	shot		girls	sex	disease		dr	ackward	ok		unknown	dr	embarassing
45-59	Female	USA	HPV test	Yes		125,000 to 149,999	Pacific	Windows Desktop / Laptop		Human	Palliomalvirus	Vaccination		cervical	cancer	vaccination		Human	Papilloma	Virus		new	pap	smear		new	pap	smear
45-59	Female	USA	New Pap smear	No		125,000 to 149,999	Middle Atlantic	Windows Desktop / Laptop		youth	unknown	great		new	amazing	like		unfamiliar	youth	unknowledgeable		grateful	easy	women		scary	accurate	tested
30-44	Female	USA	New Pap smear	Yes		175,000 to 199,999	East North Central	Windows Desktop / Laptop		preventive	good	healthy		confusing	misleading	no		screening	diagnose	routine		routine	uncomfortable	screening		Better	convenient	one test
45-59	Female	USA	HPV test	No		50,000 to 74,999	Mountain	MacOS Desktop / Laptop		shot	prevention	std		needle	prevention	ouch		STD	youth	sex		need	prevention	no fun		easier	better	healthier
30-44	Female	USA	New Pap smear	No		75,000 to 99,999	East South Central	Windows Desktop / Laptop		hpv	hpv	hpv		HPV	HPV	HPV		human	papilloma	virus		pap	smear	hpv		new	pap	smear
45-59	Female	USA	HPV test	Yes		10,000 to 24,999	South Atlantic	Android Phone / Tablet		necessary	for younger people too	quick		May hurt	necessary	occasional		occasional	necessary	good results		necessary	occasional	effective		improved	better results	effective
45-59	Female	USA	New Pap smear	No		75,000 to 99,999	West South Central	Windows Desktop / Laptop		vaccination	imposed	choice		vaccinations	shots	imposed		voluntary	dr appointment	routine		appointment	follow-up	normal		dr appointment	follow up	normal
45-59	Female	USA	HPV test	Yes		Prefer not to answer	South Atlantic	Windows Desktop / Laptop		new	std	girls		unknown	maybe	girls		new	really	why		awful	really?	purpose		really	same	again
45-59	Female	USA	New Pap smear	No		Prefer not to answer	Pacific	MacOS Desktop / Laptop		creepy	unknown	hopeful		doubtful	untrustworthy	scam		ugg	annoying	creepy		yucky	painful	ugg		confusing	so what	whatever
45-59	Female	USA	New Pap smear	No		10,000 to 24,999	Pacific	Windows Desktop / Laptop		seen	commerical	for		what	the	heck		what	strange	quetions		have	had	hysterectemy		seems	the	same
18-29	Female	USA	New Pap smear	No		25,000 to 49,999	Mountain	Windows Desktop / Laptop		None	None	None		None	None	None		None	None	None		July	July	July		July	July	July
18-29	Female	USA	New Pap smear	Yes		100,000 to 124,999	Mountain	MacOS Desktop / Laptop		cancer	vaccine	cervix		Helpful	Preventative	vaccine		test	cancer	doctor		test	doctor	cancer		doctor	test	cancer
18-29	Female	USA	New Pap smear	No		50,000 to 74,999	East North Central	Windows Desktop / Laptop		cancer	shots	protection		shot	risks	side effects		disease	save	lives		yearly	safe	awkward		interested	detection	health
45-59	Female	USA	New Pap smear	No		150,000 to 174,999	South Atlantic	iOS Phone / Tablet		Necessary	Girls	Boys		Necessarily	All	Women		Necessary	Girls	Boys		Necessary	All	Women		Important	Innovative	Helpful
45-59	Female	USA	New Pap smear	No		Prefer not to answer	Mountain	Windows Desktop / Laptop		unknown	shot	unknown		shot	unknown	great		screening	precancerous	unknown		vaginal	screening	cancer		precancerous	screening	vaginal
45-59	Female	USA	HPV test	No		10,000 to 24,999	South Atlantic	Windows Desktop / Laptop		Don't like needles	not sure	????		not sure	don't like needles	maybe good		interested	hopeful	???		uncomforable	don't like	try to avoid		carious	hopeful	glad
30-44	Female	USA	New Pap smear	Yes		25,000 to 49,999	East North Central	Windows Desktop / Laptop		smart	needed	new		smart	needed	healthy		easy	necessary	smart		routine	healthy	needed		smart	needed	advanced
30-44	Female	USA	HPV test	Yes		50,000 to 74,999	West South Central	Windows Desktop / Laptop		controversial	life saving	helpful		controversial	life saving	helpful		screening	cancer prevention	life saving		gross	uncomfortable	necessary		unknown	whatever I have to do	intrusive
45-59	Female	USA	New Pap smear	No		100,000 to 124,999	East North Central	Windows Desktop / Laptop		young	girls	teens		new	scarey	necessary		necessary	quick	easy		gross	necessary	yearly		good	innovative	necessary
45-59	Female	USA	HPV test	No		75,000 to 99,999	East North Central	Windows Desktop / Laptop		history	cancer	prevention		womens	cancer	shot		cancer	history	test		necessary	yearly	test		necessary	cancer	test
45-59	Female	USA	New Pap smear	No		25,000 to 49,999	East South Central	Android Phone / Tablet		ouch	shot	many		easy	quick	prefered		easy	quick	comfortable		quick	easy	fast		easy	comfortable	quick
45-59	Female	USA	New Pap smear	No		Prefer not to answer	East North Central	iOS Phone / Tablet		Human	Papilloma	Virus		?	?	?		?	?	?		?	?	?		?	?	?
45-59	Female	USA	HPV test	No		50,000 to 74,999	West North Central	Windows Desktop / Laptop		shot	better	safe		shot	better	safe		yes	safer	sooner		dread	undress	hate		unsure	dread	unknown
18-29	Female	USA	New Pap smear	Yes		25,000 to 49,999	Pacific	iOS Phone / Tablet		Many	Shot	Prevent		Hpv	Sti	Unsure		Unknown	Prevent	Pap?		Peace of mind	Annual	Prevent		Regular	Ouch	Peace of mind
45-59	Female	USA	New Pap smear	No		25,000 to 49,999	West South Central	iOS Phone / Tablet		Oral	Shot	Expensive		Lifesaver	Sterility	Chemotherapy		Killer	Aids	HIV		Uncomfortable	Spectrum	Stirrups		Enlightening	Lifesaver	Old
45-59	Female	USA	New Pap smear	Yes		25,000 to 49,999	East North Central	Windows Desktop / Laptop		smart	safe	painful		breakthrough	hope	prevention		huh?	necessary	unpleasant		ugh!	humiliating	uncomfortable		reassuring	wise	uncomfortable
30-44	Female	USA	New Pap smear	No		25,000 to 49,999	Middle Atlantic	Windows Desktop / Laptop		Sexually	Transmitted	Disease		Cancer	Of	Cervix		Sexually	Transmitted	Disease		Test	For	Irregularties		Test	For	Inconsistency
30-44	Female	USA	New Pap smear	No		25,000 to 49,999	New England	Windows Desktop / Laptop		vaccination	shot	young		n/a	n/a	n/a		n/a	n/a	n/a		ouch	annoying	inconclusive		n/a	n/a	n/a
30-44	Female	USA	New Pap smear	No		200,000 and up	Middle Atlantic	Windows Desktop / Laptop		Quick	Painless	Voluntary		Quick	Painless	Voluntary		Quick	Necessary	Inexpensive		Quick	Painless	Necessary		Quick	Painless	Necessary
45-59	Female	USA	HPV test	No		10,000 to 24,999	Pacific	Windows Desktop / Laptop		needle	hurt	ouch		needle	hurt	ouch		cancer	vagina	exam		vagina	cold	speculum		vagina	speculum	cold
30-44	Female	USA	HPV test	No		Prefer not to answer	Mountain	Windows Desktop / Laptop		early detection	uncomfortable	a necessary evil		preventative	necessary	helpful		uncomfortable	necessary	screening		uncomfortable	embarassing	not fun		uncomfortable	early screening	cancer detection
45-59	Female	USA	HPV test	No		50,000 to 74,999	South Atlantic	Windows Desktop / Laptop		helpful	probably should do it	another shot		pain	prevention	shot		early screening	unfamiliar	smart		yuck	dread	necessary		better	more advanced	great for women
45-59	Female	USA	HPV test	Yes		125,000 to 149,999	Mountain	Windows Desktop / Laptop		shot	needle	reaction site		shot	needle	reaction site		necessary	life saving	important		uncomfortable	necessary	life saving		important	nescessary	life saving
45-59	Female	USA	HPV test	Yes		Prefer not to answer	Middle Atlantic	Windows Desktop / Laptop		necessary	all genders	easy		youth	all genders	stop the spread		should be routine	yearly	redundant		yearly	individual	wise		worthwhile	individual	yearly
18-29	Female	USA	New Pap smear	No		Prefer not to answer	South Atlantic	Windows Desktop / Laptop		needle	ouch	medicine		needle	vagina	bad		needle	sick	medicine		vagina	swab	cold		vagina	cold	swab
30-44	Female	USA	HPV test	Yes		100,000 to 124,999	East North Central	Windows Desktop / Laptop		what is this	great	who needs it		amazing	great	really?		good	what does it test	how is it tested		necessary	not fun	uncomfortable		what is "new"	?	?
30-44	Female	USA	HPV test	No		50,000 to 74,999	West South Central	Windows Desktop / Laptop		teens	side effects	controversy		painful	side effects	implications		std	promiscuous	worry		uncomfortable	yuck	necessary		innovative	advanced	better
45-59	Female	AUS	New Pap smear	Yes		90,000 to 119,999	Western Australia	Android Phone / Tablet		Not sure	Not sure	Simple		Easy	Convenient	Reliable		Needed	Reliable	Simple		Necessary	Reliable	Simple		Better	Convenient	Similar
30-44	Female	USA	New Pap smear	No		100,000 to 124,999	South Atlantic	iOS Phone / Tablet		Hyped	Pointless	Invasive		Pointless	Scary	Side effects		Knowledge	Choices	New		Trusty	Same	Comfortable		Innovative	New	Consistent
30-44	Female	USA	New Pap smear	No		150,000 to 174,999	Mountain	Windows Desktop / Laptop		prevention	from	disease		prevent	cancer	shot		blood	test	check		check	for	cancer		updated	cancer	check
30-44	Female	USA	HPV test	No		25,000 to 49,999	East North Central	Windows Desktop / Laptop		Injection	Shot	Prevention		Injection	Shot	Prevention		Cervical	Cancer	Doctor		Doctor	Test	Uncomfortable		Doctor	Cold	Uncomfortable
45-59	Female	USA	New Pap smear	No		200,000 and up	South Atlantic	iOS Phone / Tablet		Human papilloma virus	Cancer	Needed		Needed	Cancer	Prevention		Exam	Results	Needed		Standard	Prevention	Needed		Improved	Standard	Comprehensive
30-44	Female	USA	New Pap smear	No		Prefer not to answer	South Atlantic	Windows Desktop / Laptop		simple	quick	easy		exciting	expecting	confusing		simple	quick	easy		Vagina	pain	boring		confusing	new?	weird
45-59	Female	USA	HPV test	No		10,000 to 24,999	West South Central	Android Phone / Tablet		Good	Wow	Fantastic		Great	Happy	Wonderfull		Strange	Accurate	Embarrassing		Gross	Uncomfortable	Necessary		Easy	Fast	New
18-29	Female	USA	New Pap smear	Yes		50,000 to 74,999	East North Central	iOS Phone / Tablet		No	Questionable	Inconsistent		FALSE	Risky	Questionable		Scary	Awkward	Necessary		Vagina	Uncomfortable	Awkward		Worthwhile	Accurate	Improvement
45-59	Female	USA	New Pap smear	Yes		200,000 and up	East North Central	iOS Phone / Tablet		Herpes	Cancer	Illness		Cancer	Early	Detection		Cervix	Cancer	Test		Cancer	Gynocology	Cervix		Cervix	Cancer	Test
45-59	Female	AUS	New Pap smear	Yes		60,000 to 89,999	New South Wales	Android Phone / Tablet		Inj	Gardadil	Immunity		Injection	Hpv	Gardasil		Blood	Needle	Pathology		Doctor	Appointment	Exam		Doctor	Path	Test
18-29	Female	USA	New Pap smear	No		100,000 to 124,999	Pacific	Android Phone / Tablet		Rust	Problem	Needles		Death	Pink	Baby		Doctor	Gloves	Fright		Gloves	Cold	Woman		Uncomfortable	Pain	Vagina
45-59	Female	USA	HPV test	Yes		25,000 to 49,999	West South Central	Windows Desktop / Laptop		I	don't	know		I	don't	know		I	don't	know		I	don't	know		i	don't	know
18-29	Female	USA	New Pap smear	Yes		75,000 to 99,999	Pacific	Windows Desktop / Laptop		Wonderful	Necessary	Preventative		Wonderful	Necessary	Preventative		necessary	cancer	treatment		uncomfortable	awkward	necessary		awkward	uncomfortable	better
45-59	Female	USA	New Pap smear	No		0 to 9,999	New England	Android Phone / Tablet		prevent	get tested	gyn		good	should get	prevent		should get	young women and men	gyn		gyn	test	appointment		appointment	gyn	get it
45-59	Female	USA	HPV test	No		100,000 to 124,999	East North Central	Windows Desktop / Laptop		virgins	helpful	health		hope	important	more		unsure	why	who		need	screen	warning		better	cancer	good
45-59	Female	USA	New Pap smear	No		25,000 to 49,999	South Atlantic	Windows Desktop / Laptop		female	shots	Jeni		wow	dr	aunt		dr	no	need		smells	no	embarassing		dr	hate	gross
45-59	Female	USA	New Pap smear	No		200,000 and up	East North Central	Windows Desktop / Laptop		don't know anything about	what is the research	any side effects		don't know anything about it	what is the research	what are the side effects		see previous answers	see previous answers	see previous answers		ick	have to do	painful		ick	have to do it	painful
30-44	Female	USA	New Pap smear	Yes		50,000 to 74,999	Pacific	MacOS Desktop / Laptop		NA	NA	NA		NA	NA	NA		NA	NA	NA		NA	NA	NA		NA	NA	NA
30-44	Female	USA	New Pap smear	No		10,000 to 24,999	Middle Atlantic	Other		should consider for daughter	shouldve had many years ago	hearing recently risks		expensive	new	helpful in certain circumstances		not too new	helpful	young girls		test	gyno	needed		i need	glad improved	just now heard of
45-59	Female	USA	HPV test	Yes		125,000 to 149,999	Pacific	Windows Desktop / Laptop		New	Vaccine	Extra		OK	Young	Another		More	Labs	Money		Old	Routine	Unnecessary		FDA	Unnecessary	Paycheck
45-59	Female	USA	HPV test	Yes		25,000 to 49,999	West South Central	Windows Desktop / Laptop		INFECTION	DISEASE	HIV		CANCER	PREVENTIVE	SHOTS		TRANSMITTED	DISEASE	HERPES		NASTY	UGLY	EMBRASSING		NASTY	UGLY	EMBRASSING
30-44	Female	USA	HPV test	No		50,000 to 74,999	New England	iOS Phone / Tablet		Safe	Necessary	Helpful		Precaution	Invasive	Helpful		Cautious	Prevalent	Safe		Classic	Safe	Necessary		Safe	Uncomfortable	Necessary
45-59	Female	USA	New Pap smear	Yes		50,000 to 74,999	West South Central	Windows Desktop / Laptop		teens	untested	potential		HPV	research	everyone		warts	youth	common		uncomfortable	annual	necessary		frequency	research	uncomfortable
45-59	Female	USA	New Pap smear	No		100,000 to 124,999	East North Central	Windows Desktop / Laptop		for kids	too late for me	worthwhile		No such thing	would love it if it was real	False security as not all cervical cancer is caused by HPV		I knew it when I had it	Not necessary as its visible	Not needed if you're vaccinated		ouch	stirrups	speculum		ouch	more reliable	speculum
30-44	Female	USA	New Pap smear	No		100,000 to 124,999	East North Central	Windows Desktop / Laptop		useful	helpful	cautious		risky	unstudied	trial		virus	test	scary		yuck	miserable	yearly		maybe	risks	rewards
45-59	Female	USA	New Pap smear	No		10,000 to 24,999	Pacific	MacOS Desktop / Laptop		doubt I'd need it	no idea	not sure		not	sure	if I need it		no idea	think I'm too old	isn't it for younger girls		yuck	no thanks	dread		Sure	if it'll help	why not
30-44	Female	USA	New Pap smear	No		200,000 and up	East North Central	iOS Phone / Tablet		Commercials	Manditory	Complications		Commercials	Manditory	Complications		Commericals	Marketing	Doctor		Doctor	Preventative	Cancer		New	Effectiveness	Why
45-59	Female	USA	New Pap smear	No		25,000 to 49,999	West North Central	Windows Desktop / Laptop		shot	prevention	cervix		prevent	cancer	shot		lab	swab	cervix		cervical	cancer	prevention		cancer	detection	preventative
45-59	Female	USA	New Pap smear	Yes		25,000 to 49,999	West North Central	Windows Desktop / Laptop		protection	teens	throat cancer		prevention	teens	pain		cancer	waiting	prevention		pain	prevention	cancer		prevention	unknown	future
45-59	Female	USA	HPV test	Yes		50,000 to 74,999	Pacific	MacOS Desktop / Laptop		interesting	Helpful?	Big Pharm		Helpfull?	Details	Big Pharm		helpful	good	Age?		Standard	Good	uncomfortable		advancement	improvement	helpfull?
18-29	Female	USA	New Pap smear	No		25,000 to 49,999	South Atlantic	Windows Desktop / Laptop		prevents	hurts	helpful		benefical	hurts	prevents		helpful	neat	beneficial		needed	helpful	uncomfortable		beneficial	helpful	uncomfortable
45-59	Female	USA	HPV test	No		Prefer not to answer	East North Central	Windows Desktop / Laptop		Shot	OK	arm		shot	protection	death		test	shot	age		YUK	uncomfortable	embarrassing		yuk	uncomfortable	embarrassing
30-44	Female	USA	New Pap smear	No		100,000 to 124,999	East South Central	Windows Desktop / Laptop		Shot	Doctor	Fee		Nonexistent	needed	doctor		Blood	Doctor	Insurance		Annual	Checkup	Doctor		Uncertain	Interested	Doctor
45-59	Female	USA	HPV test	No		Prefer not to answer	Pacific	Windows Desktop / Laptop		unclear	detection	prevention		good	helpful	prevention		old	detection	prevention		old	detection	prevention		unknown	detection	prevention
45-59	Female	USA	HPV test	Yes		50,000 to 74,999	Pacific	Android Phone / Tablet		Wise	Prevention	Safety		Unclear	Good?	Question		Cancer	Smart	Wise		Uncomfortable	Necessary	Information		What	Why	How
45-59	Female	USA	New Pap smear	No		25,000 to 49,999	South Atlantic	Windows Desktop / Laptop		shot	pain	hurt		good	helpful	advance		good	healthy	helpful		viginal	cover	hurt		good	advance	helpful
18-29	Female	USA	HPV test	No		Prefer not to answer	East North Central	Android Phone / Tablet		Nop	Nope	Nope		Gardisil	Effective	Nope		Std	Personal	Nope		Nop	Hdh	Fjg		I	Don't	Know
45-59	Female	AUS	HPV test	No		Prefer not to answer	Tasmania	Windows Desktop / Laptop		Prevents	Innovation	Necessary		Innovative	Necessary	Life Saving		Necessary	Saves Lives	More Accurate		Life Saving	Less Accurate	Obsolete		Improved	Saves Lives	Necessary
45-59	Female	USA	New Pap smear	No		125,000 to 149,999	East North Central	Windows Desktop / Laptop		Aids	germs	sickness		cancer	cancer	cancer		cancer	cancer	vacine		swab	cancer	gyno		cancer	vagina	gyno
45-59	Female	USA	HPV test	No		25,000 to 49,999	East North Central	Windows Desktop / Laptop		cervical cancer	tried	prevention		hpv	shot	new		hope	better	faster		old	speculum	detection		new	better	promising
45-59	Female	USA	New Pap smear	No		100,000 to 124,999	New England	Windows Desktop / Laptop		shot	tv	commercial		shot	doctor	prevention		young	new	cancer		cancer	doctor	office		cancer	doctor	office
45-59	Female	USA	New Pap smear	No		200,000 and up	Pacific	MacOS Desktop / Laptop		untested	ineffective	risky		unlikely	to	work		fine	ok	maybe		uncomfortable	annoying	necessary		fine	whatever	ok
18-29	Female	USA	New Pap smear	Yes		25,000 to 49,999	West North Central	Windows Desktop / Laptop		needle	preventative	canver		scary	intimidating	worth it		scary	intimidating	questionable		annual	normal	easy		new	normal	easy
18-29	Female	USA	HPV test	Yes		25,000 to 49,999	West North Central	Windows Desktop / Laptop		hong kong	diseny	america		blood cancer	brain cancer	liver cancer		eye test	brain test	body test		what	what	what		what	what	what
45-59	Female	USA	HPV test	Yes		150,000 to 174,999	East North Central	Windows Desktop / Laptop		young person	effective	ani vaxers		safe	good things	young person		better	test	often		test	uncomfortable.	painful		confusing	costly	uncomfortable
18-29	Female	USA	New Pap smear	No		50,000 to 74,999	Middle Atlantic	Windows Desktop / Laptop		teen	std	preventive		preventive	new	cautionary		precaution	std	safe		gynocologist	vagina	test		improved	doctor	test
45-59	Female	USA	HPV test	Yes		100,000 to 124,999	East North Central	iOS Phone / Tablet		Gardasil	Kid	Warts		Gardisal	Teen	HPV		Doctor	Sexually transmitted disease	Clinic		Speculum	Annual	Doctor		Cervical	Doctor	Annual
30-44	Female	USA	New Pap smear	Yes		50,000 to 74,999	Pacific	Android Phone / Tablet		preventative	medicine	vaccine		hpv	vaccine	medicine		std	virus	cancer		routine	checkup	preventative		new	pap	smear
45-59	Female	USA	HPV test	Yes		75,000 to 99,999	Pacific	Windows Desktop / Laptop		new	younger	lifesaving		preemptive	lifesaving	neccessary		new	neccessary	lifesaving		yuck	neccessary	uncomfortable		huh	yuck	necessary
18-29	Female	USA	HPV test	No		25,000 to 49,999	South Atlantic	Windows Desktop / Laptop		Vaccine	Pain	Virus		Vaccine	Shots/Injections?	How?		Painful	Biopsy	Unfamiliar		Unpleasant	Sticky	Awkward		Awful	Uncomfortable	New?
30-44	Female	USA	New Pap smear	No		50,000 to 74,999	West South Central	Windows Desktop / Laptop		prevention	detection	responsibility		cure	prevention	detecting		prevention	detecting	testing		routine	detection	life cycle		innovative	cutting edge	hope
45-59	Female	USA	HPV test	Yes		125,000 to 149,999	Pacific	MacOS Desktop / Laptop		controversial	new	recommended		ouch	helpful	what		controversial	new	cancer		same	uncomfortable	false positives		new	better	pre-cancerous
45-59	Female	USA	New Pap smear	No		100,000 to 124,999	Mountain	MacOS Desktop / Laptop		youth	cancer	prevention		prevention	safe	cure		prevention	doctors	screener		prevention	screener	yearly		thorough	improved	similar
45-59	Female	USA	HPV test	Yes		10,000 to 24,999	East North Central	iOS Phone / Tablet		Good	Teens	Doctor		Awesome	Needed	Mandatory		Teens	Genital warts	Preventative		Yearly	Doctor	Stirrups		Better	Good	Expensive
18-29	Female	USA	HPV test	No		125,000 to 149,999	Middle Atlantic	Windows Desktop / Laptop		ujuu	uyy	uyyu		uytuyt	ytuyyt	uyuyt		ryan	john	Michael		Michael	Lawrence	Bigley		uyy	yy	trtt
45-59	Female	USA	New Pap smear	No		150,000 to 174,999	East North Central	Windows Desktop / Laptop		purpose?	easy	preventative		efficacy?	easy	preventative		virus	speculum	butterfly		yucky	uncomfortable	avoid		confused	speculum	smear
18-29	Female	USA	HPV test	Yes		25,000 to 49,999	Middle Atlantic	MacOS Desktop / Laptop		Gaurdasil	sexual	disease		needle	prevention	good		screen	prevention	doctor		vagina	swab	doctor		better	swab	vagina
18-29	Female	USA	New Pap smear	No		75,000 to 99,999	East North Central	Windows Desktop / Laptop		groundbreaking	good	cancer		HPV	good	prevention		HPV vaccine	gardasil	cancer		yearly	hurts	annoying		information	new	blank
30-44	Female	USA	New Pap smear	Yes		25,000 to 49,999	Middle Atlantic	Android Phone / Tablet		Helpful	Eradicate	Gone		Helpful	Not as prevalent	Hurt		Std	Carrier	Promiscuous		Check up	Signs	Annoying		Easier	Yuck	Clean
18-29	Female	USA	New Pap smear	Yes		0 to 9,999	Pacific	iOS Phone / Tablet		Good	Preventative	Three		HPV	Same	Different		Blood	Okay	Check		Routine	Healthy	Preventative		New	Routine	Okay
18-29	Female	USA	HPV test	No		Prefer not to answer		Android Phone / Tablet		Hpv	Vaccination	Hpv		Cervical	Cancer	Vaccination		Human	Papilloma	Virus		Pap	Smear	Pap		New	Pap	Smear
45-59	Female	USA	New Pap smear	Yes		25,000 to 49,999	Pacific	Windows Desktop / Laptop		needle	shot	painful		shot	needle	vacine		unsure	na	dont know		cotton swab	plastic	uncomfortable		gadget	cold	metal
45-59	Female	AUS	New Pap smear	No		Prefer not to answer	Queensland	iOS Phone / Tablet		Cancer	Prevent	Easy		Prevent	Cancel	Needle		Doctor	Prevent	Cost		Again	Doctor	Emotional		Cancer	Doctor	Time
45-59	Female	AUS	New Pap smear	No		0 to 29,999	New South Wales	Windows Desktop / Laptop		health	npone	none		women	health	sexuallyactive		women	sexually active	cancer		ceryes	cancer	cells		quick	easy	women
45-59	Female	AUS	New Pap smear	No		180,000 or more	Western Australia	Windows Desktop / Laptop		better	easier	happier		Better	Easier	Happier		uncomfortable	invasive	don't like		invasive	vulnerable	uncomfortable		invasive	uncomfortable	vulnerable
45-59	Female	AUS	New Pap smear	Yes		Prefer not to answer	Victoria	iOS Phone / Tablet		Injection	Cancer	Results		Good	School girls	Survival		Doctor	Screening	Sensible		Regular	Preventive	Positive		Improvement	Research	Health
18-29	Female	USA	New Pap smear	Yes		25,000 to 49,999	West South Central	Windows Desktop / Laptop		healthy	painful	shot		unknown	scary	painful		cancer	std	women		awkward	uncomfortable	healthy		unknown	test	scary
45-59	Female	USA	New Pap smear	No		100,000 to 124,999	South Atlantic	iOS Phone / Tablet		Shot	Hurt	Hip		Shot	Pain	Expensive		Exam	Doctor	Hurt		Ugh	Exam	Embarrassing		Exam	Doctor	Vaginal
45-59	Female	USA	New Pap smear	Yes		0 to 9,999	South Atlantic	Android Phone / Tablet		breakthrough	available	needed		researched	available	needed		serious	deadly	cureable		necessary	yearly	mandatory		interesting	available	great
30-44	Female	AUS	New Pap smear	No		60,000 to 89,999	New South Wales	iOS Phone / Tablet		Should	Be	Done		Should	Be	Done		Not	Sure	About this		Should	Be	One		Shoukd	Be	Done
45-59	Female	USA	New Pap smear	No		25,000 to 49,999	South Atlantic	Windows Desktop / Laptop		1	1	1		1	1	1		1	1	1		1	1	1		1	1	1
45-59	Female	AUS	New Pap smear	No		30,000 to 59,999	Victoria	MacOS Desktop / Laptop		important	young	vital		impossible	interesting	question		nothing	nothing	nothing		uncomfortable	infrequent	relief		more	information	needed
45-59	Female	USA	New Pap smear	Yes		150,000 to 174,999	West North Central	MacOS Desktop / Laptop		good idea	conscientious	responsible		never heard of	new	works?		immunization	need to give to poor women	give to teenagers free		not necessary every year	small price to pay for health	easy		don't know the difference	haven't heard anything	don't know
30-44	Female	USA	HPV test	Yes		200,000 and up	New England	iOS Phone / Tablet		Preventative	Youth	Responsible		Youth	Too late for me	Responsible		Highly transmittable	Prevalent	Sex		Yearly	Health	Discomfort		Same as old	vaginal exam	Accruate
45-59	Female	AUS	New Pap smear	No		0 to 29,999	Victoria	MacOS Desktop / Laptop		needle	doctors	teenagers		needle	prevention	teenagers		doctors	results	what?		doctor	testing	register reminder		doctors	uncomfortable	testing
45-59	Female	USA	New Pap smear	No		Prefer not to answer	East North Central	Windows Desktop / Laptop		sex	sex	sex		test	test	test		sex	sex	sex		test	test	test		test	test	test
45-59	Female	USA	New Pap smear	No		Prefer not to answer	South Atlantic	iOS Phone / Tablet		Young	Menopause	New		New	When	Consider		Young	Teen	Not		Yearly	Uncomfortable	Necessary		When	Cost	Insurance
45-59	Female	USA	HPV test	No		Prefer not to answer	New England	Windows Desktop / Laptop		none	none	none		none	none	none		none	none	none		none	none	none		none	none	none
45-59	Female	AUS	New Pap smear	No		Prefer not to answer	Victoria	Windows Desktop / Laptop		ineffective	illness-causing	hearsay		unsure	age	ineffective		quick	safe	easy		accepted	safe	easy		unsure	trial	hope
45-59	Female	USA	New Pap smear	Yes		25,000 to 49,999	South Atlantic	Windows Desktop / Laptop		hiv	aids	testing		helpful	authentic	reliable		aids	hiv	testing		testing	cervical cancer	painful		reliable	interesting	cancer related
45-59	Female	USA	New Pap smear	No		150,000 to 174,999	East North Central	Windows Desktop / Laptop		shot	ouch	helpful?		impossible	painful	fake		catchable	sexually transmitted	common		needed	annual	test		test	better	results
45-59	Female	USA	New Pap smear	No		75,000 to 99,999	South Atlantic	Windows Desktop / Laptop		preventive	shot	women		shot	preventive	younger females		virus	females	sexually transmitted		exam	dr office	dreaded		optimistic	exam	new
45-59	Female	USA	New Pap smear	Yes		25,000 to 49,999	East North Central	Windows Desktop / Laptop		H	P	Vaccination		cervical	cancer	vaccination		HPV	Human	Virus		pap	smear	pap		New	Pap	Smear
18-29	Female	USA	New Pap smear	Yes		100,000 to 124,999	West South Central	Windows Desktop / Laptop		HPV	vaccine	vaccination		useful	helpful	preventative		fast	safe	effective		diagnostic	preventative	safe		New	Pap	Smear
30-44	Female	USA	New Pap smear	Yes		Prefer not to answer	Mountain	Android Phone / Tablet		Get	It	Done		Time	Is	Now		Necessary	Preventative	Wellness		Uncomfortable	Important	Humiliating		Why	How	When
45-59	Female	USA	New Pap smear	Yes		75,000 to 99,999	Pacific	Windows Desktop / Laptop		beneficial	annual	medical		beneficial	painful	invasive		preventable	beneficial	hereditary		uncomfortable	invasive	beneficial		vaginal	invasive	detector
30-44	Female	USA	HPV test	No		25,000 to 49,999	Pacific	iOS Phone / Tablet		None	None	None		Cancer	None	One		None	None	None		None	None	None		Pap	Smear	New
45-59	Female	USA	New Pap smear	No		10,000 to 24,999	South Atlantic	iOS Phone / Tablet		Multiple sex partners	Uncomfortable	Overlooked		No	Harmful	Money		Necessary	Overlooked	Men too		Standard	Necessary	Annual		What	Is	It
45-59	Female	USA	New Pap smear	No		100,000 to 124,999	West South Central	Windows Desktop / Laptop		preventive	injection	abnormal cells		prevention	yearly	one time		virus	abnormal cells	cancer		yearly	female	test		same	abnormal	cells
30-44	Female	AUS	New Pap smear	No		0 to 29,999	New South Wales	Android Phone / Tablet		protection	saftey	needle		protection	prevention	safety		detection	smear	women		uncomfortable	vagina	prongs		better	efficient	reults
45-59	Female	USA	HPV test	No		Prefer not to answer	Middle Atlantic	Windows Desktop / Laptop		shot	preventive	lasting		shot	preventive	lasting		thorough	preventive	yearly		preventive	yearly	necessary		preventive	thorough	yearly
45-59	Female	USA	New Pap smear	No		Prefer not to answer	Pacific	Windows Desktop / Laptop		necessary	necessary	necassary		important	important	important		important	necessary	need		uncomfortable	important	helpful		not sure	not sure	not sure
45-59	Female	USA	HPV test	Yes		75,000 to 99,999		iOS Phone / Tablet		Test	Cervical	Review		Treatment	Avoid	Detect		Human	Infection	Test		Regular	Cervic	Test		Vaginal	Test	Required
30-44	Female	USA	HPV test	No		25,000 to 49,999	Middle Atlantic	Windows Desktop / Laptop		safe	healthly	painless		cancer	vagina	death		pain	open	foul		painful	exposed	uncomfortable		quick	exposed	open
45-59	Female	USA	HPV test	No		50,000 to 74,999	South Atlantic	Windows Desktop / Laptop		middle school	three	good idea		shot	how necessary	how effective		difference	questions	how often		uncomfortable	annual	gyn		gyn	hassle	test
45-59	Female	USA	New Pap smear	No		Prefer not to answer	Mountain	iOS Phone / Tablet		Okay	More?	Lifesaver		Necessary	Great	Lifesaving		Easy	Relevant	Advanced		Necessary	Annoying	Lifesaving		Easy	Relevant	Advanced
45-59	Female	AUS	New Pap smear	No		Prefer not to answer	Victoria	Android Phone / Tablet		Necessary	Inclusive	Needef		Valuable	Necessary	Relief		Unsure	Include	Check		Necessary	Awkward	Indication		Improved	Unsure	Evolution
45-59	Female	USA	New Pap smear	No		25,000 to 49,999	South Atlantic	Windows Desktop / Laptop		child	preventive	female		unknown	where	who		child	preventive	female		adult	yearly	self		adult	yearly	self
18-29	Female	USA	HPV test	No		200,000 and up	Pacific	Windows Desktop / Laptop		Cat	Dog	Mouse		Antivaxxer	Crazy	Good		Human	Papilloma	Virus		Popsickle	Delicious	Grandpa		Cheese	Stinky	Nuevo
30-44	Female	USA	New Pap smear	No		25,000 to 49,999	Middle Atlantic	Android Phone / Tablet		Vaccine	Medicine	Human		Medicine	Cervix	Female		Virus	Human	Disease		Test	Gynocologist	Uncomfortable		Test	Gynocologist	Uncomfortable
18-29	Female	USA	New Pap smear	Yes		25,000 to 49,999	West North Central	Windows Desktop / Laptop		shots	three	prevention		I	don't	know		cells	cancer	wall		vagina	tool	cancer		precancerous	screening	detailed
45-59	Female	USA	New Pap smear	No		Prefer not to answer	New England	iOS Phone / Tablet		Human	Preventative	Vaccine		Cervix	Cancer	Shot		Human	Personal	Virus		Yucky	Smelly	Necessary		New	Yucky	Wimen
45-59	Female	USA	New Pap smear	No		100,000 to 124,999	East North Central	Windows Desktop / Laptop		HIV	Shot	liquid		Leep	pain	biopsy		HIV	Sex	Dirty		doctor	annual	smear		Appealing	Doctor	Schedule
30-44	Female	USA	New Pap smear	No		25,000 to 49,999	Pacific	Windows Desktop / Laptop		solution	opportunity	better		Unsure	possibility	relief		Unclear	contagious	ill		Cautious	Checkup	prevention		Checkup	prevention	questionable
45-59	Female	USA	HPV test	No		100,000 to 124,999	Pacific	Windows Desktop / Laptop		simple	needed	good		needed	needed	needed		needed	helpful	good		hurts	helpful	fast		better	painful	needed
45-59	Female	USA	HPV test	No		Prefer not to answer	Pacific	Windows Desktop / Laptop		teen	cancer	virus		HPV	prevention	teen		teen	girl	doctor		woman	exam	doctor		unknown	test	updated
45-59	Female	USA	New Pap smear	No		25,000 to 49,999	East North Central	Windows Desktop / Laptop		human	papilloma	virus		new	effective	easy		std	cervix	pap		uncomfortable	annual	preventative		predictive	new	effective
45-59	Female	USA	New Pap smear	No		50,000 to 74,999	West South Central	Windows Desktop / Laptop		sexually-active	std	precaution		FALSE	what	crazy		valid	std	helpful		yearly	prevention	cancer		annual	cancer	warning
18-29	Female	USA	New Pap smear	Yes		0 to 9,999	West North Central	MacOS Desktop / Laptop		hpv	vaccination	yo		hello	goodbye	dumb		human	papilloma	virus		pap	freking	smear		new	pap	smear
18-29	Female	USA	New Pap smear	Yes		Prefer not to answer	New England	iOS Phone / Tablet		Bad	Good	SCARY		SCARY	Good	Cool		Scary	Cool	Interestingly		Interesting	Neat	Scary		Helpful	Scary	Cool
45-59	Female	USA	New Pap smear	No		Prefer not to answer	Mountain	Windows Desktop / Laptop		vaccine	prevention	shots		prevents	disease	shots		virus	screening	disease		screening	yuck	uncomfortable		screening	yuck	uncomfortable
45-59	Female	USA	New Pap smear	Yes		10,000 to 24,999	Pacific	Windows Desktop / Laptop		Prevention	Peace	Protection		Protection	Education	Peace		Protection	Vigilence	Peace		Protection	Foresight	peace		Protection	Proactive	Peace
45-59	Female	USA	New Pap smear	No		50,000 to 74,999	New England	MacOS Desktop / Laptop		needle	unnecessary	girls		expensive	unnecessary	youth		youth	media	controversy		necessary	healthy	safe		modern	gynecologist	cancer
45-59	Female	AUS	New Pap smear	No		90,000 to 119,999	Queensland	iOS Phone / Tablet		Doctors	Embarresment	Prevention		Doctors	Time	Cost		Dctors	Cancer	Cells		Embarresment	Doctors	Time		Cost	Doctors	Results
30-44	Female	AUS	New Pap smear	No		Prefer not to answer	New South Wales	Windows Desktop / Laptop		Young People	Sexual abstinance before marriage	Sadly necessary		Useful	Doctor	Protection		STD	Vaccination	Cancer		Prevention	Cancer	Test		Safer	Cost	Prevention of cancer
30-44	Female	USA	New Pap smear	Yes		50,000 to 74,999	East South Central	iOS Phone / Tablet		Reliable	Necessary	Important		New	Relief	Reliable		New	Accurate	Saving		Necessary	Accurate	Advanced		Accurate	Familiar	Important
45-59	Female	USA	New Pap smear	No		25,000 to 49,999	East North Central	Windows Desktop / Laptop		new	chancy	unsure		maybe	new	unsure		cancer	illness	fear		good	old	tested		nervous	cancer	results
45-59	Female	USA	New Pap smear	No		50,000 to 74,999	Middle Atlantic	Windows Desktop / Laptop		safe	secure	success		easy	non invasive	success		safe	secure	accurate		trustworthy	safe	invasive		new	better	improved
45-59	Female	USA	New Pap smear	No		Prefer not to answer	East North Central	Windows Desktop / Laptop		research	selective	wary		beneficial	history	new		awareness	preventable	women		mainstay	annual	necessary		easy	conclusive	informative
30-44	Female	AUS	New Pap smear	Yes		180,000 or more	New South Wales	iOS Phone / Tablet		Good	Necessary	Should be for everyone		HVP vaccination	Good	Necessary		Necessary	Uncomfortable	Screening		Necessary	Uncomfortable	Screning		Necessary	Uncomfortable	Screening
45-59	Female	AUS	HPV test	Yes		30,000 to 59,999	Victoria	iOS Phone / Tablet		Cancer	Prevention	Needle		Needle	Cancer	Prevention		Viginal	Cancer	Doctor		Vaginal	Cervix	Cancer		Cervical	Cancer	Uncomfortable
45-59	Female	USA	New Pap smear	Yes		Prefer not to answer	East North Central	Windows Desktop / Laptop		wonderful	preventive	both genders		descriptive	specific	layman's term		specific	intimidating	unclear to many		noxious	archaic	unpleasant term		vague	nondescript	innovative-sounding
45-59	Female	AUS	HPV test	No		30,000 to 59,999	New South Wales	Windows Desktop / Laptop		easier	accurate	simple		prevention	cure	satisfaction		accurate	satisfy	easier		nessecary	proven	a must		better	necessary	right
18-29	Female	USA	New Pap smear	No		10,000 to 24,999	East North Central	Windows Desktop / Laptop		painful	insurance	young		painful	expencive	insurance		scarping	painful	women		painful	cold	awkward		cold	ackward	needed
30-44	Female	USA	HPV test	No		0 to 9,999	West South Central	iOS Phone / Tablet		Nessasary	Control	Containment		Rare	Unheard of	Treatment		Nessasary	Technology	Awareness		Required	Private	Annual		Gross	Weird	Scary
45-59	Female	USA	New Pap smear	No		25,000 to 49,999	South Atlantic	iOS Phone / Tablet		Pregnancy	Abstinence	No		Painful	Death	Stress		Too old	Not interested	Not interested		Yuck	Embarrassing	Shy		Comfortable	Encouraged	Free
30-44	Female	USA	New Pap smear	No		25,000 to 49,999	Pacific	Windows Desktop / Laptop		i	don't	know		i	DON'T	KNOW		i	don't	know		I	don't	know		i	don't	know
45-59	Female	USA	New Pap smear	No		25,000 to 49,999	Pacific	iOS Phone / Tablet		Better	Use	Cost		Wonders	Yes	Live		Needed	Early	Detection		Cramps	Mess	Sorry		Painless	Easy	Better
30-44	Female	USA	HPV test	No		Prefer not to answer	West North Central	Windows Desktop / Laptop		no	never	no way		no	never	nope		must	absolutely	scary		must do	every year	safe		maybe	information	cost
30-44	Female	USA	New Pap smear	No		50,000 to 74,999	East North Central	Android Phone / Tablet		Effects	Girls	Active		Shots	Side effects	Death		Std	Doctor	Sex		Obgyn	Women	Spotting		Ob	New test	Cancer
45-59	Female	USA	New Pap smear	No		200,000 and up	Pacific	MacOS Desktop / Laptop		should	happy	everyone		really	must	unknown		wart	std	teen		vag exam	cancer	young		unknowledgable	progress	vag exam
18-29	Female	USA	New Pap smear	No		25,000 to 49,999	West North Central	iOS Phone / Tablet		Human	Pamplona	Shot		Female	Shot	Pre		S. T. D.	Female	Pap		Ouch	Doctor	Yearly		Ouch	New technology	Different
45-59	Female	USA	HPV test	No		25,000 to 49,999	East South Central	Android Phone / Tablet		test	woman	idea		smart	helpful	shot		smart	unknown	New		embarrassing	uncomfortable	dislike		scary	great	good
45-59	Female	USA	New Pap smear	Yes		25,000 to 49,999	Mountain	iOS Phone / Tablet		Fast	Preventive	Current		Easy	Cheap	Preventative		Labratory	Detection	Expensive		Invasive	Effective	Annual		Updated	Effective	Prescreen
30-44	Female	USA	New Pap smear	No		Prefer not to answer	New England	Windows Desktop / Laptop		side effects	longevity	safety		horrifying	scary	survivable?		needles	Dr visit	waiting		uncomfortable	routine	clinical		neutral	time out of day	wait for results
30-44	Female	AUS	HPV test	No		90,000 to 119,999	Victoria	iOS Phone / Tablet		Pap	Immunisation	Virus		Needle	Immunisation	Skeptical		Virus	Pap	Spectrum		Spectrum	Ouch	Cervix		Better	Spectrum	Ouch
45-59	Female	USA	New Pap smear	Yes		Prefer not to answer	South Atlantic	Windows Desktop / Laptop		preventative	helpful	young		HPV	necessary	helpful		cancer	sex	condom		dread	necessary	cold		innovative	inclusive	finally
45-59	Female	USA	New Pap smear	Yes		Prefer not to answer	West North Central	Windows Desktop / Laptop		shot	ouch	dont need		dont need	dont need	dont need		dont need	dont want	expensive		need	always negative	sick of having them		new	need	expensive
45-59	Female	USA	HPV test	No		25,000 to 49,999	East North Central	Windows Desktop / Laptop		needed	necessary	helpful		scary	necessary	ah man		yuck	necessary	yuck		yuck	necessary	uncomfortable		yuck	nescessary	uncomfortable
45-59	Female	AUS	HPV test	No		90,000 to 119,999	Victoria	MacOS Desktop / Laptop		cervical cancer	STD	free		great	preventative	free		blood test	no idea	free		intrusive	uncomfortable	annoying		annoying	intrusive	uncomfortable
30-44	Female	USA	New Pap smear	No		50,000 to 74,999	East South Central	Windows Desktop / Laptop		NONE	NONE	NONE		NINE	NONE	NONE		NONE	NONE	NONE		NONE	NONE	NONE		NOINE	NONE	NONE
30-44	Female	USA	New Pap smear	Yes		Prefer not to answer	East North Central	Android Phone / Tablet		Necessary	Preventative	Everyone		Interesting	Smart	Necessary		Scrape	Discomfort	Similar		Uncomfortable	Necessary	Scraping		Comprehensive	Sensitive	Better
45-59	Female	AUS	New Pap smear	No		90,000 to 119,999	South Australia	Windows Desktop / Laptop		uncomfortable	invasive	necessary		uncomfortable	invasive	necessary		uncomfortable	invasive	necessary		uncomfortable	invasive	necessary		uncomfortable	invasive	necessary
60+	Female	AUS	New Pap smear	No		Prefer not to answer	New South Wales	MacOS Desktop / Laptop		uncomfortable	embarrassing	necessary		unheard of	dislike	frequency?		necessary	uncomfortable	ongoing		ongoing	embarrassing	important		up to date	uncomfortable	necessary
45-59	Female	AUS	HPV test	No		90,000 to 119,999	New South Wales	Android Phone / Tablet		prevent	good	new		prevent	good	safe		virus	cancer	check		uncomfortable	anxious	chore		uncomfortable	different	test
30-44	Female	USA	New Pap smear	No		125,000 to 149,999	West North Central	Windows Desktop / Laptop		Prevention	Safety	Protection		Courage	Prevention	Safety		Screening	Prevention	Testing		Detection	Previous	Prevention		Detection	Prevention	Annually
45-59	Female	USA	New Pap smear	Yes		Prefer not to answer	East North Central	Windows Desktop / Laptop		PREVENTION	YOUNG	EVERYONE		IMPORTANT	YOUNG	PREVENTION		CANCER	PREVENTION	DISEASE		CANCER	YEARLY	EMBARRASING		BREAKTHROUGH	CURE	IMPORTANT
18-29	Female	USA	New Pap smear	No		0 to 9,999	Middle Atlantic	iOS Phone / Tablet		STD	Sex	Test		Obgyn	Doctor	Stirrups		Gaurdacil	Painful	Doctor		OBGYN	Doctor	Test		Vagina	Test	Doctor
30-44	Female	USA	New Pap smear	No		25,000 to 49,999	South Atlantic	Windows Desktop / Laptop		risky	preventative	side effecrts		risky	side effects	preventative		smart	preventative	care		preventative	smart	uncomfortable		curious	preventative	smart
45-59	Female	USA	HPV test	No		25,000 to 49,999	Pacific	Android Phone / Tablet		ok	kinda scary	not favorite		scary	bad	don't like		aids	bad	scary		uncomfortable	depressing	avoid		bad	scsry	run
45-59	Female	AUS	New Pap smear	No		180,000 or more	Victoria	iOS Phone / Tablet		Medical	Warts	Needle		Women	Prevent	Death		Must	Foot	Catching		Awkward	Doctor	Yearly		Good	Woman	Cancer
30-44	Female	USA	HPV test	Yes		75,000 to 99,999	West South Central	Windows Desktop / Laptop		Same	Good	Prevention		Good	Prevention	Controversy		Good	Prevention	Uncomfortable		Good	Prevention	Uncomfortable		Good	Prevention	Uncomfortable
45-59	Female	USA	New Pap smear	No		75,000 to 99,999	Pacific	Windows Desktop / Laptop		good	necessary	solution		young	good	solution		good	necessary	solution		pain	discomfort	necessary		new	tool	women
45-59	Female	AUS	New Pap smear	Yes		30,000 to 59,999	New South Wales	Windows Desktop / Laptop		new	cervical	virus		ph virus	age	effectiveness		detects	changes	cervice		exmaination	standard	changes		cervical	cancer	virus
45-59	Female	USA	New Pap smear	No		Prefer not to answer	New England	Windows Desktop / Laptop		ok	ok	ok		ok	?once	ok		ok	now	n/a		yearly	ugh	a must		easy	ok	ok
18-29	Female	USA	New Pap smear	Yes		100,000 to 124,999	Mountain	iOS Phone / Tablet		Expensive	Aversive	Unnecessary		Costly	FALSE	Unneeded		Smart	Invasive	Costly		Ouch	Cold	Necessary		Novel	Innovative	Money
45-59	Female	USA	HPV test	Yes		50,000 to 74,999	East North Central	Windows Desktop / Laptop		painful	3 injections	doctor's office		HPV	gardasil	injection		needles	pap smear	nothing else		painful	irritating	uncomfortable		easy	painless	costly
30-44	Female	AUS	New Pap smear	No		0 to 29,999	Western Australia	Android Phone / Tablet		necessary	important	unsure		important	prevention	necessary		unsure	necessary	prevention		prevention	uncomfortable	necessary		unsure	important	prevention
45-59	Female	USA	HPV test	No		25,000 to 49,999	Pacific	iOS Phone / Tablet		Younger	Important	Unpopular		Teens	Prevention	New		Whatever	Recommended	Unpleasant		Painful	Unpleasant	Necessary		Same	Whatever	Doctors
45-59	Female	USA	HPV test	Yes		25,000 to 49,999	East South Central	Windows Desktop / Laptop		painful	anxious	nervous		painful	necessary	uncomfortable		necessary	uncomfortable	nuisance		painful	anxious	necessary		necessary	painful	anxious
18-29	Female	USA	New Pap smear	No		25,000 to 49,999	Middle Atlantic	iOS Phone / Tablet		Cervical cancer	Teenagers	Preventative		Prevent	Cervix	Baby		Women	Preventative	Cervical cancer		Yearly checkup	OBGYN	Test		Better	Early detection	Cancer
30-44	Female	USA	New Pap smear	Yes		100,000 to 124,999	Pacific	Windows Desktop / Laptop		needle	prevention	sore		helpful	prevention	medical		question	results	screening		gooey	painful	needed		cells	slide	pink
45-59	Female	AUS	New Pap smear	No		90,000 to 119,999	Queensland	Android Phone / Tablet		New	Useful	Innovative		Good	Useful	Uninvasive		Helpful	Life-saving	Good		Uncomfortable	Useful	Necessary		Unknown	Useful	New
18-29	Female	USA	HPV test	No		0 to 9,999	Pacific	iOS Phone / Tablet		Shot	Human	Woman		Shot	Medicine	Health		Pelvis	Exam	Doctor		Doctor	Exam	Test		Doctor	Exam	Pelvis
45-59	Female	USA	HPV test	No		75,000 to 99,999	East North Central	Windows Desktop / Laptop		Human	Papiloma	Virus		Prevention	cancer	infection		protection	caution	necessary		early	prevention	proactive		Improved	precautionary	lifesaving
45-59	Female	USA	New Pap smear	No		Prefer not to answer	West North Central	iOS Phone / Tablet		Needle	Shot	Scary		Needle	Shot	Scary		Virus	Incurable	Transmittable		Traditional	Reliable	Painful		Unfamiliar	Unsure	Researchable
30-44	Female	USA	HPV test	Yes		125,000 to 149,999	West North Central	Windows Desktop / Laptop		good	gardasil	cervarix		gardasil	cervarix	now		std	warts	pap		yearly	cancer	screening		good	less frequent	check
30-44	Female	USA	New Pap smear	No		0 to 9,999	Middle Atlantic	Windows Desktop / Laptop		NONE	NONE	NONE		NONE	NONE	NONE		NONE	NONE	NONE		NONE	NONE	NONE		NONE	NONE	NONE
30-44	Female	USA	New Pap smear	No		Prefer not to answer	East North Central	Windows Desktop / Laptop		only if it helps	does it detect	can you still get it		only if you do not want kids	does it help to get pregnant	don't do it do special needs people		only ifyou are taking drugs	are sex acative	going to take drugs		should not be done	only if you are pregnant	do not do it you have to		rather have it not done	don't do it to special needs	does it hurt
30-44	Female	USA	New Pap smear	No		75,000 to 99,999	Pacific	iOS Phone / Tablet		Solution	Not	Necessary		Uncomfortable	Discomfort	Extra		Test	Another	Discomfort		Uncomfortable	Test	Extra		Uncomfortable	Test	Time
45-59	Female	USA	New Pap smear	No		75,000 to 99,999	East North Central	Windows Desktop / Laptop		is	it	needed		don't	know	about		found	inaccurate	recently		do	it	regularly		it	sounds	interesting
45-59	Female	AUS	New Pap smear	No		90,000 to 119,999	Victoria	MacOS Desktop / Laptop		needle	disease	prevention		needle	prevention	disease		disease	health	prevention		doctor	prevention	test		cancer	test	prevention
30-44	Female	USA	HPV test	No		25,000 to 49,999	South Atlantic	Android Phone / Tablet		Disease	Prevention	Sexually		Preventive	Cure	Female		Disease	Illness	Contagious		Vaginal	Intrusive	Violated		Vagina	Preventive	Advanced
30-44	Female	USA	New Pap smear	Yes		25,000 to 49,999	East North Central	iOS Phone / Tablet		Cervical cancer	Teens and young adults	Preventative		HPV	Preventative	Gynecologist		Std screen	Cervical cancer	Preventative		Invasive	Cold	Preventative		Modern	Preventative	Less invasive
30-44	Female	USA	New Pap smear	No		0 to 9,999	Middle Atlantic	Windows Desktop / Laptop		NONE	NONE	NONE		NONE	NONE	NONE		NONE	NONE	NONE		NONE	NONE	NONE		NONE	NONE	NONE
45-59	Female	AUS	HPV test	No			New South Wales	Windows Desktop / Laptop		sceptical	unknown	side effects		uncomfortable	life saving	essential		uncomfortable	life saving	essential		uncomfortable	necessary	life saving		necessary	uncomfortable	invasive
45-59	Female	AUS	HPV test	No		Prefer not to answer	Western Australia	iOS Phone / Tablet		New	Scary	Unsure		Important	Good	Nervous		Important	Fine	When		Old	Necessary	Uncomfortable		Oh joy	Good	Trying
18-29	Female	USA	New Pap smear	No		10,000 to 24,999	Pacific	iOS Phone / Tablet		Necessary	Health	Prevention		Cost	Effectiveness	Rate		Trustworthy?	Accurate?	Useful		Essential	Yearly	Prevention		Healthier	Easier	Detection
30-44	Female	USA	HPV test	No		0 to 9,999	West South Central	Android Phone / Tablet		to know	health	no worry		good	health	knowing		good	health	low risk		health	uncomfortable	knowing		efficient	uncomfortable	health
30-44	Female	USA	HPV test	Yes		100,000 to 124,999	Pacific	iOS Phone / Tablet		Good	Reduction	Needed		Hpv	Needle	Safe		Sex	Preventable	Doctor		Vagina	Cancer	Screening		Cancer	Vagina	Dirty
45-59	Female	USA	New Pap smear	No		100,000 to 124,999	South Atlantic	Windows Desktop / Laptop		needless	painful	limited usefulness		not proven	huge windfall for manufacturer	usefulness to be seen		test for viral disease	medical test	laboratory test		medical test	test for women only	gynecological test		not an old Pap smear	Pap smear done again	another one
30-44	Female	AUS	HPV test	No		120,000 to 149,999	New South Wales	Android Phone / Tablet		prevention	doctor	good		prevention	doctor	good		doctor	vagina	exam		vagina	pinch	important		confused	doctor	advice
45-59	Female	AUS	New Pap smear	No		30,000 to 59,999	South Australia	Windows Desktop / Laptop		easy	safe	unsure		security	safe	confident		different	safe	unsure		yuck	safe	unsure		safe	confident	exciting
18-29	Female	USA	New Pap smear	No		50,000 to 74,999	New England	Android Phone / Tablet		Doctor	Pain	Adolescent		Helpful	Doctor	Pain		Disease	Test	Contagious		Vagina	Doctor	Gynecologist		Cancer	Vagina	Doctor
30-44	Female	USA	HPV test	Yes		Prefer not to answer	Middle Atlantic	Android Phone / Tablet		Needed	Important	Good idea		Great idea	Do it	Where can i get it		Needed	Important	Saves lives		Uncomfortable	Embarressing	Humilating		Try it	Still feel same	Not looking forward to it
30-44	Female	USA	New Pap smear	No		50,000 to 74,999	West North Central	Android Phone / Tablet		shot	disease	sex		shot	death	life		std	blood	sex		cold	gyno	pain		i	dont	know
30-44	Female	AUS	New Pap smear	No		90,000 to 119,999	Western Australia	iOS Phone / Tablet		Painless	Needle	Arm		Safe	Painless	Reliable		Safe	Accurate	Reliable		Vagina	Cold	Speculim		Vagina	Cold	Speculim
45-59	Female	USA	New Pap smear	No		Prefer not to answer	West North Central	Other		no	no	no		No	No	No		scary	young	awkward		yuck	dr	necessary		promising	exposed	chore
45-59	Female	USA	New Pap smear	Yes		25,000 to 49,999	Pacific	Windows Desktop / Laptop		prevention	clinic	std		hpv	prevention	test		prevention	std	cervical cancer		yearly	prevention	test		better results	more prevention	test
45-59	Female	USA	New Pap smear	No		100,000 to 124,999	East South Central	iOS Phone / Tablet		Effective	Important	Individualized		Important	Lifesaving	Effective		Necessary	Effective	Important		Painful	Effective	Necessary		Needed	Effective	Painless
45-59	Female	AUS	New Pap smear	No		0 to 29,999	Victoria	Android Phone / Tablet		Hpv	Vaccinate	Prevention		Cervical	Cancer	Vaccination		H	P	V		Old	Pap	Smear		New	Pap	Smear
45-59	Female	USA	New Pap smear	Yes		Prefer not to answer	Mountain	iOS Phone / Tablet		Teens	Pain	Sex		Scam	Money maker	Mercury		Teens	Sex	Needed		Annual	Doctor	Screening		Better	Preventative	Expensive
30-44	Female	USA	New Pap smear	Yes		50,000 to 74,999	East North Central	iOS Phone / Tablet		Probable	Why not	Ok		Uncertain	Good	Why not		Superfluous	Unnecessary	Additional		Duckbill	Cold	Pressure		New	Same	Accurate
45-59	Female	AUS	HPV test	No		120,000 to 149,999	Queensland	iOS Phone / Tablet		Needle	virus	prevention		Needle	prevention	disease		Diagnose	prevent	disease		Discomfort	regular	female		Discomfort	important	disease
18-29	Female	USA	New Pap smear	No		25,000 to 49,999	Middle Atlantic	Windows Desktop / Laptop		needle	commercial	shots		cancer	shots	cure		waiting	health	women		doctor	results	waiting		difference?	better	effective
18-29	Female	USA	New Pap smear	No		150,000 to 174,999	Mountain	iOS Phone / Tablet		Shots	Needles	Doctors		CANCER	shots	Docs		Disease	Doctors	No		Slap	Peanuts	Pears		Papa	Why	What
18-29	Female	AUS	New Pap smear	No		120,000 to 149,999	Victoria	iOS Phone / Tablet		Strange	Ok	Expensive		Not real	Strange	Ok		New	Safe	Little painful		Old	Awkward	Little painful		New	Safe	Quick
45-59	Female	AUS	New Pap smear	Yes		Prefer not to answer	New South Wales	Windows Desktop / Laptop		I	don't	know		for	younger	girls		i	dont	know		cervical	cancer	test		better	cancer	testing
30-44	Female	USA	New Pap smear	Yes		0 to 9,999	West South Central	Android Phone / Tablet		shot	shot	shot		shot	shot	shot		blood	needles	exam		vaginal exam	uncomfortable	embarrassing		doctor	paper gowns	uncomfortable
18-29	Female	AUS	New Pap smear	No		30,000 to 59,999	Queensland	iOS Phone / Tablet		Medical	Prevention	Teenager		Prevention	Needle	Risk		Needle	Doctor	Treatment		Intrusive	Doctor	Rarely		Intrusive	Doctor	Detection
45-59	Female	USA	New Pap smear	No		0 to 9,999	New England	Windows Desktop / Laptop		shot	needle	vacination		shot	needle	vaccination		screening	new	unsure		stirrups	pain	vunerablilty		speculum	stirrups	pinching
30-44	Female	USA	New Pap smear	No		50,000 to 74,999	Pacific	Windows Desktop / Laptop		doctor	girls	young		doctor	pre-cancer	detect		simple	necessary	doctor		doctor	legs	uncomfortable		doctor	legs	office
60+	Female	AUS	New Pap smear	No			South Australia	Windows Desktop / Laptop		none	remote	who		possible	consensus	age		unsure	unclear	unheard		ovarian	examination	biyearly		yes	agree	o.k.
30-44	Female	USA	New Pap smear	No		50,000 to 74,999	West South Central	Windows Desktop / Laptop		dangerous	risky	bigpharma		dangerous	risky	bigpharma		test	test	test		annually	necessary	preventitive		necessary	preventative	recommended
30-44	Female	AUS	New Pap smear	No		60,000 to 89,999	Victoria	Windows Desktop / Laptop		young woman	needle	std		amazing	wish i was younger	awesome		std	warts	protection		invasive	yucky	avoid		invasive	aweful	cancer
30-44	Female	AUS	HPV test	Yes		Prefer not to answer	South Australia	iOS Phone / Tablet		Good	Relevant	Necessary		Wanted	Necessary	Compulsory		Scary	Needed	Useful		Scary	Good	Needed		Good	Useful	Necessary
18-29	Female	USA	New Pap smear	Yes		25,000 to 49,999	Pacific	iOS Phone / Tablet		Prevention	Necessary	Great		Prevention	Necessary	Great		Good	Awareness	Needed		Necessary	Awareness	Painless		Learning	Better	Advancement
30-44	Female	USA	New Pap smear	No		100,000 to 124,999	Mountain	Android Phone / Tablet		Untested	Unnecessary	Useless		Untested	Panic-inducing	Unnecessary		Self-serving	Self-necessitating	Panic-inducing		Yearly	Typical	Expected		No	Comment	Necessary
30-44	Female	AUS	New Pap smear	No		150,000 to 179,999	Victoria	iOS Phone / Tablet		As before	As before	As before		A step too far	Not even evidence to agree	Prefer smear testing		Modern science	Better detection if proven	Minor side effects		A must	Not enjoyable	Very important		Future science	Forward thinking	Early detection
18-29	Female	USA	HPV test	Yes		50,000 to 74,999	Pacific	Windows Desktop / Laptop		Phases	Necessary	Changing		Shot	Safe	Requirement		Necessary	Easy	Pain-Free		Cotton Swab	Traditional	Annual		Improved	Early Awareness	Health
45-59	Female	AUS	HPV test	Yes		30,000 to 59,999	New South Wales	Windows Desktop / Laptop		prevention	stop	cancer		wonderful	prevention	cure		prevention	detection	cancer		early	detection	cancer		prevention	early	detection
45-59	Female	AUS	New Pap smear	No		180,000 or more	Victoria	Android Phone / Tablet		better	easier	less stress		positive	easy	essential		unknown	what	how		yuk	painfull	anxieity		improvement	better	positive
45-59	Female	AUS	New Pap smear	Yes		90,000 to 119,999	Queensland	Windows Desktop / Laptop		does	not	exist		doesnt	not	exist		painful	invasive	hurts		painful	invasive	hurts		painful	invasive	hurts
45-59	Female	USA	HPV test	Yes		50,000 to 74,999	Mountain	Other		who	cost	?		?	what	who		who	when	cost		meh	necessary	?		cost	?	?
30-44	Female	USA	New Pap smear	No		Prefer not to answer	Pacific	MacOS Desktop / Laptop		teens	controversy	educate		HPV	teens	unsure		teens	controversy	educate		preventative	health	scary		unsure	questions	difference
45-59	Female	USA	New Pap smear	No		175,000 to 199,999	Mountain	iOS Phone / Tablet		Shot	For	Prevention		Hpv	Shot	Prevention		People	Virus	Test		Test	Cervical	Tissue		HPV	Cervical	Test
30-44	Female	AUS	HPV test	No		Prefer not to answer	Victoria	Windows Desktop / Laptop		unknown	new	trial		horrible	invasive	necessary		uncomfortable	painful	invasive		cancer	necessary	uncomfortable		unknown	interesting	invasive
45-59	Female	USA	New Pap smear	No		75,000 to 99,999	East North Central	Windows Desktop / Laptop		dangerous	unhelpful	why		hype	uncertain	cautious		questionable	uncertain	unreliable		annual	normal	diagnostic		okay	annual	diagnostic
45-59	Female	USA	New Pap smear	No		Prefer not to answer	Mountain	Windows Desktop / Laptop		VACCINE	SEX	doctor		vaccine	cancer	scary		test	virus	doctor		cold	stirrups	doctor		test	cold	doctor
45-59	Female	USA	New Pap smear	No		100,000 to 124,999	West South Central	Windows Desktop / Laptop		ok	>	?		ok	new	?		dirty	sex	sick		?	?	?		ok	?	?
30-44	Female	USA	New Pap smear	No		125,000 to 149,999	Pacific	iOS Phone / Tablet		Prevention	Proactive	Vaccine		Preventative	Proactive	Vaccine		Prevention	Disease	Internal		Duck bill	Swab	Internal		Improved	Swab	Edamibwton
30-44	Female	USA	HPV test	Yes		200,000 and up	Middle Atlantic	iOS Phone / Tablet		Proven	Reliable	Necessary		Necessary	Important	Proven		Necessary	Proven	Safe		Necessary	Annoying	Painful		Newest	Necessary	Unclear
45-59	Female	USA	New Pap smear	Yes		50,000 to 74,999	Pacific	Android Phone / Tablet		Huh	What	No		Unsure	More	Research		Unsure	Untested	Urgh		Uncomfortable	Necessary	Yearly		Hopefully	Will	Work
18-29	Female	USA	New Pap smear	No		25,000 to 49,999	East North Central	Android Phone / Tablet		Vaccination	Vaccination	Vaccination		Cervix	Cervical	Vaccination		H	P	V		Vaginal	Bacteria	Microscopes		Vaginally	Microscopes	Prevent
30-44	Female	USA	HPV test	No		75,000 to 99,999	Pacific	Windows Desktop / Laptop		too old	important	everybody		awesome	important	does it work		important	annual	screening		uncomfortable	annual	doctor		uncomfortable	neccessary	healthy
45-59	Female	AUS	New Pap smear	No		150,000 to 179,999	Victoria	iOS Phone / Tablet		Prevent	Young	Cancer		Preventive	Safe	Cancer		Cervix	Cancer	Doctor		Annual	Cancer	Cells		Cervix	Smear	Pain
18-29	Female	AUS	New Pap smear	No		180,000 or more	Australian Capital Territory	Windows Desktop / Laptop		Initiative	Smart	Innovative		Progressive	Initiative	Youth		Important	Necessary	Scary		Uncomfortable	Invasive	Necessary		innovative	smart	safe
18-29	Female	USA	New Pap smear	No		25,000 to 49,999	Mountain	Other		Needle	Husband	trust		Fake	Surgery	pain		Partner	safety	Money		Stick	safe	Pain free		Safe	preferred	painless
45-59	Female	USA	New Pap smear	No		10,000 to 24,999	East North Central	iOS Phone / Tablet		This	Is	Farcical		Hpv	Test	Cervical cells		Herpes	2	Titer		I	Have	No problem in		No	Difference	Tests are identical to each other according to the information provided
30-44	Female	USA	HPV test	Yes		175,000 to 199,999	West South Central	Android Phone / Tablet		Unsure	Scary	Undecided		Definitely	Necessary	When		Yearly	Educate	Necessary		Necessary	Quick	Cold		Don't	K own	About
45-59	Female	USA	New Pap smear	No		0 to 9,999	West North Central	Other		Untried	Experimental	Costly		Unproven	Untried	Unsafe		Scary	Worrisom	Cancer		Safe	Necessary	Protective		Curious	Necessary	Safe
45-59	Female	AUS	New Pap smear	No		0 to 29,999	Western Australia	Windows Desktop / Laptop		good	painless	investigating		painful	death	loss		?	?	?		awful	uncomfortable	necessary		good	clearer	painless?
45-59	Female	USA	New Pap smear	No		25,000 to 49,999	West South Central	Android Phone / Tablet		good	need	helpful		unknown	good	unlikely		better	detecting	pre-cancerous		necessary	detector	good		better	detects	pre-cancerous
18-29	Female	USA	New Pap smear	Yes		0 to 9,999	East South Central	iOS Phone / Tablet		Shot	Shot	Shot		Cervical	Cancer	Shog		Shot	Shot	Shot		Nasty	Hurt	Eww		Hurt	Hurt	Hurt
30-44	Female	USA	HPV test	No		50,000 to 74,999	Pacific	Windows Desktop / Laptop		teens	health	risk		Women	Health	pervention		health	pervention	test		health	women	pervention		pervention	women	health
45-59	Female	USA	New Pap smear	No		25,000 to 49,999	East North Central	Windows Desktop / Laptop		Preventative	Progress	Helpful		Prevention	Lives	purposeful		Good	Prevention	Better		Necessary	Preventive	Gynecologist		Better	Prevention	Regular
45-59	Female	USA	New Pap smear	Yes		125,000 to 149,999	South Atlantic	MacOS Desktop / Laptop		never	harmful	SCARY		RISKY	NEVER	DEATH		voluntary	risky	caution		good	necessary	required		benefical	required	good
45-59	Female	AUS	HPV test	No		90,000 to 119,999	South Australia	Windows Desktop / Laptop		safe	preventative	easy		preventative	safe	easy		safe	preventative	easy		uncomfortable	embarrasing	neccessary		preventative	safe	easy
18-29	Female	USA	HPV test	Yes		10,000 to 24,999	Pacific	Windows Desktop / Laptop		recover	isolation	hospital		cancer	health	sick		virgin	prenant	test		virgin	sexual	test		cancer	check	virgin
30-44	Female	AUS	New Pap smear	Yes		150,000 to 179,999	Victoria	MacOS Desktop / Laptop		young	girls	once		young	girls	once		vaccine	cancer	yucky		hurts	awkward	necessary		hurts	awkward	necessary
45-59	Female	AUS	New Pap smear	No		120,000 to 149,999	Queensland	iOS Phone / Tablet		Prevent	Cancer	Sexually transmitted		Life	Prevention	Accessible		How different to pap smear	Prevent	Doctor		Necessary	Cervical cancer	Doctor		What's different	How better	How often
45-59	Female	USA	New Pap smear	No		75,000 to 99,999	South Atlantic	iOS Phone / Tablet		Innoculation	Teenagers and young adults	Important		Young adults	Necessary	Preventative		Inoculation	Unprotected sex	Vaginal exam		Gynecologist	Vaginal exam	Cancer detection		Cancer detection	Vaginal examination	Gynecologist
30-44	Female	AUS	HPV test	No		30,000 to 59,999	Victoria	Android Phone / Tablet		H	Pap	Virus		Preventative	Of	Cervical cancer		Human	Papilloma virus	Test		Cancer	Cervical	Test		Clearer	Accurate	Deterrence
45-59	Female	USA	HPV test	No		175,000 to 199,999	South Atlantic	iOS Phone / Tablet		Hypo	Plasma	Virus		Women	Bad	Treatment		Women	Cancer	Virus		Women	Hurt	Necessary		Better	Women	Yealy
18-29	Female	AUS	New Pap smear	No		60,000 to 89,999	Queensland	Windows Desktop / Laptop		Doctor	Injection	protection		HPV	Cancer	injection		swab	pap smear	doctor		swab	doctor	Test		better	easier	better covered
60+	Female	AUS	New Pap smear	No		60,000 to 89,999	New South Wales	Windows Desktop / Laptop		unknown	needles	allergy		interesting	unknown	when		human	contradictory	unknown		current	easy	awkward		known	current	easy
45-59	Female	USA	HPV test	No		10,000 to 24,999	Pacific	Windows Desktop / Laptop		available	effective	nescessary		unavailable	interesting	nonexistant		new	interesting	available		annual	needed	affordible		intersting	curious	nescessary
45-59	Female	AUS	HPV test	Yes		Prefer not to answer	Queensland	Windows Desktop / Laptop		easy	effective	cheap		easy	effective	cheap		known	cancer	reliable		embarrassing	essential	cancer		new	smear	embarrassing
45-59	Female	USA	New Pap smear	No		0 to 9,999	Pacific	Windows Desktop / Laptop		shot	protection	cervix		important	death	health		scary	uncomfortable	preventative		uncomfortable	necessary	preventative		Uncomfortable	cancer	preventative
45-59	Female	USA	New Pap smear	Yes		50,000 to 74,999	Pacific	Windows Desktop / Laptop		shot	shot	shot		shot	appointment	prevention		unknown	unknown	unknown		appointment	dr	unknown		appointment	dr	uncomfortable
18-29	Female	USA	HPV test	Yes		25,000 to 49,999	Mountain	Windows Desktop / Laptop		needles	medecine	prevention		useful	saving lifes	needles		preventable	helpful	needed		ouch	no thank you	scary		unknown	new	upgrade
30-44	Female	USA	New Pap smear	No		10,000 to 24,999	Middle Atlantic	Windows Desktop / Laptop		Prevention	Cancer	Disease		Cancer	Cervical	Prevention		Cancer	Prevention	Cyst		Breast	Cancer	Prevention		Breast	Cancer	Prevention
45-59	Female	AUS	HPV test	Yes		0 to 29,999	Queensland	Android Phone / Tablet		Wow	Advancement	Revolutionize		Precursor	Breast	Cancer		Mysterious	Advanced	Important		Unpleasant	Necessary	Prevention		Benefits	Advanced	Prevention
45-59	Female	USA	New Pap smear	No		10,000 to 24,999	South Atlantic	Android Phone / Tablet		New	Research needed	Does this work		Vaccination	Who knows	Explorer		Not sure	Never had done	Thought for young people		Check	Painful	Embarrassed		I do not know	Never heard of it	Should do some research
18-29	Female	USA	New Pap smear	No		10,000 to 24,999	Pacific	Windows Desktop / Laptop		commercial	Gardicle	safe		more commercials	death	scary		i dont know	doctors	test		doctors	girls	routine		safe	regular	trust
60+	Female	AUS	New Pap smear	Yes		0 to 29,999	Victoria	Windows Desktop / Laptop		help prevent c/cancer	preventive	responable		preventioncervicalcancer	caring	responsibality		cervical cancer check	reliable	responable		cervical cancer check	preventable	responsability		better	reliable	responsability
45-59	Female	USA	New Pap smear	No		25,000 to 49,999	Pacific	Windows Desktop / Laptop		shot	kids	adults?		shot	necessary	new		new	yearly?	Papilloma?		yearly	doctor	appt		good!	doctor	appointment
30-44	Female	USA	New Pap smear	No		50,000 to 74,999	Middle Atlantic	iOS Phone / Tablet		Human	Papilloma	Virus		Human	Papilloma	Virus		Pre	Cancer	Screening		Speculum	Cancer	Screening		Pre	Cancer	Screening
45-59	Female	USA	New Pap smear	No		25,000 to 49,999	South Atlantic	iOS Phone / Tablet		Important	Diagnose	Early		Preemptive	Teens	Good decision		Important	Diagnose	Prevention		Awkward	Important	Good		Effective	Detection	Giid
45-59	Female	USA	New Pap smear	No		100,000 to 124,999	Middle Atlantic	iOS Phone / Tablet		Why	Vaccination	Health		Cervical	Cancer	Vaccination		Why	Human	Virus		Pap	Smear	Health		Why	New	Pap
30-44	Female	USA	HPV test	No		10,000 to 24,999	Middle Atlantic	Windows Desktop / Laptop		precaution	risk	prevention		needed	important	wanted		important	uncommon	necessary		cold	painful	necessary		cold	painful	necessary
45-59	Female	USA	HPV test	No		Prefer not to answer	Middle Atlantic	iOS Phone / Tablet		Human	Virus	Shot		HPV	Pre-sex	Prevention		Speculum	Test	Docor		Annual	Speculum	Smear		Test	Improved	Doctor
18-29	Female	AUS	New Pap smear	Yes		90,000 to 119,999	Queensland	MacOS Desktop / Laptop		new	great	boys and girls		hpv vax	no such thing	?>		sti	?	?		uncomfortable	2 yearly	cells		better	less risk	proven
30-44	Female	USA	New Pap smear	No		50,000 to 74,999	South Atlantic	Android Phone / Tablet		Not necessary	Money marker	Stupid		NA	NA	NA		Expensive	Unnecessary	N.A.		Annual	Needed	Best		NA	NA	NA
45-59	Female	AUS	New Pap smear	Yes		Prefer not to answer	Queensland	Windows Desktop / Laptop		unknown	less uncomfortable?	ask		unsure	check	less uncomfortable?		current test?	uncomfortable	cancer		uncomfortable	regular	cancer		unknown	try	ask doctor
45-59	Female	USA	New Pap smear	No		10,000 to 24,999	Middle Atlantic	Android Phone / Tablet		painful	necessity	common		scarry	painful	necessity		teens	pap smear	sick		sore	ob gyn	yearly		new	pap	smear
45-59	Female	USA	HPV test	No		75,000 to 99,999	West North Central	Windows Desktop / Laptop		25	young	insurance		HPV	25	boys		vacine	25	positive		yearly	three	blah		bs	HPV	marketing
45-59	Female	USA	HPV test	No		75,000 to 99,999	South Atlantic	Android Phone / Tablet		Both sexes	Pre teen	Free		Early prevention	Teenager	Both sexes		Pap smear	Yearly	Cancer		Yearly	Cancer	Birth control		Yearly	Early detection	Better
45-59	Female	AUS	HPV test	Yes		30,000 to 59,999	New South Wales	Windows Desktop / Laptop		prevention	cervical	cancer		vaccine	HPV	prevention		testing	precancerous	cells		uncomfortable	detection	precancerous		better	earlier	detection
30-44	Female	AUS	New Pap smear	No		60,000 to 89,999	New South Wales	MacOS Desktop / Laptop		Should	Adult	Jab		Girls	Teenage	Line up		Worry	Warts	Cancer		Doctor Papnicolaiou	Speculum	Nurse		ThinPrep	Cells	Smear
45-59	Female	USA	New Pap smear	No		50,000 to 74,999	South Atlantic	Windows Desktop / Laptop		concerned	researched	no		risk	untested	no		useful	easy	comforting		annoying	useful	tedious		maybe	testing	research
30-44	Female	AUS	New Pap smear	No		150,000 to 179,999	Northern Territory	Android Phone / Tablet		never heard of	whats this	unsure		finally	worth while	important		never heard	sounds std related	unsure		embarrassing	essential	saves lives		embarrassing	delay	overdue
60+	Female	AUS	New Pap smear	Yes		120,000 to 149,999	Victoria	Windows Desktop / Laptop		Free	Effective	Necessary		Free	Necessary	Needed		Effective	Necessary	Free?		Effective	Invasive	Necessary		New	Better	Still invasive
45-59	Female	AUS	New Pap smear	No		120,000 to 149,999	Queensland	Windows Desktop / Laptop		Good	Necessary	Late		I	know	nothing		New	Ignorant	Progress		Necessary	Uncomforatble	Bienniel		Ignorant	Progress	New
30-44	Female	USA	HPV test	No		0 to 9,999	Middle Atlantic	Windows Desktop / Laptop		prevention	smart	helpful		helpful	smart	preventative		Updated	Health Conscious	Smart		Smart	helpful	preventative		Smart	updated	health conscious
30-44	Female	USA	New Pap smear	Yes		75,000 to 99,999	East North Central	iOS Phone / Tablet		Std	Safe	Effective		Hpv	Safe	Effective		Std	Finding	New		Detecting	Cancer	Safe		Better	Detecting	New
30-44	Female	AUS	New Pap smear	Yes		0 to 29,999	Victoria	Windows Desktop / Laptop		unsure	helpful	epilepsy		woman	hate	helpful		good	necesary	droll		painful	necessary	good		same	painful	helpful
45-59	Female	AUS	New Pap smear	No		90,000 to 119,999	New South Wales	iOS Phone / Tablet		Syringe	Doctor	Immunity		Immunity	Doctor	Syringe		Wart	Invasive	Doctor		Speculum	Laboratory	Result		New	Better	Up to date
45-59	Female	USA	New Pap smear	No		Prefer not to answer	East North Central	Android Phone / Tablet		Good	preventive	smart		smart	Good	helpful		accurate	Good	helpful		uncomfortable	preventive	healthy		better	healthier	accurate
45-59	Female	USA	HPV test	No		75,000 to 99,999	New England	MacOS Desktop / Laptop		young	teens	intercourse		same	as	hpv		precancerous	screening	effective		annual	wellness	screening		not	enough	info
45-59	Female	USA	New Pap smear	No		Prefer not to answer	South Atlantic	Windows Desktop / Laptop		n/a	n/a	n/a		n/a	n/a	n/a		n/a	n/a	n/a		n/a	n/a	n/a		n/a	n/a	n/a
18-29	Female	AUS	New Pap smear	Yes		30,000 to 59,999	New South Wales	Windows Desktop / Laptop		important	young people	std		3 shots	painful	compulsory		unknown	important	preventative		uncomfortable	important	safe		unknown	innovative	important
18-29	Female	USA	New Pap smear	No		50,000 to 74,999	South Atlantic	iOS Phone / Tablet		Shot	Prevent	Medicine		Shot	Cervix	Cancer		Shots	Disease	Check up		Jelly	Vagina	Gynecologist		New	Different	Improved
45-59	Female	USA	New Pap smear	No		75,000 to 99,999	South Atlantic	iOS Phone / Tablet		Prevention	Helpful	Future		Helpful	Prevention	Proactive		Helpful	Informative	Diagnostic		Annoying	Prevention	Informative		Better	Advanced	Updated
18-29	Female	AUS	New Pap smear	No		150,000 to 179,999	Victoria	iOS Phone / Tablet		Necessary	Life saving	Doctor		Important	Painful	Necessary		Female	Uncomfortable	Medical		Uncomfortable	Necessary	Safe		Uncomfortable	Interesting	Positive
45-59	Female	USA	HPV test	Yes		50,000 to 74,999	New England	MacOS Desktop / Laptop		cervical cancer vaccine	protection	prevetative medicine		HPV	early prevention	protection		early detection	pre cancer detection	informational		cervical cell smear	vaginal exam	yearly		improved	more accurate	more specific
18-29	Female	USA	HPV test	No		50,000 to 74,999	Pacific	Windows Desktop / Laptop		Recommended for preteens through age 26	Can still receive some benefits & protection if over age 26	Available for girls/women & boys/men		Synonymous with HPV vaccine	No vaccine available to treat cancer once diagnosed	Only available for women		Common virus	HPV Vaccine	carefully compare HPV & Pap test results for comprehensive picture		Papanicolaou test	preventative screening	Non-annual		Tests for precancerous cells	Requires speculum	Less intrusive than traditional Pap smear
60+	Female	AUS	New Pap smear	No		30,000 to 59,999	Victoria	Windows Desktop / Laptop		effective	innovative	great		innovative	effective	worldwide		excellemt	innovative	great		essential	uncomfortable	necessary		innovative	excellent	necessary
60+	Female	AUS	New Pap smear	No		30,000 to 59,999	New South Wales	MacOS Desktop / Laptop		need	reason	relevence		wow	need	why		speculum	discomfort	necessary		speculum	discomfort	necessary		pre cancer	speculum	discomfort
30-44	Female	USA	New Pap smear	No		25,000 to 49,999	East North Central	Windows Desktop / Laptop		discovering	adavanced	informative		amazing	exciting	discovering		exciting	amazing	informative		exciting	amazing	defining		interesting	exciting	amazing
18-29	Female	USA	New Pap smear	Yes		10,000 to 24,999	Pacific	Windows Desktop / Laptop		same as before	get it done	needed		needle	needed	get it done		annual	once a YEAR	get it done		annual	needed	helpful		needed	annual	helpful
30-44	Female	AUS	New Pap smear	No		0 to 29,999	South Australia	iOS Phone / Tablet		Injection	Gloves	Table		Injection	Relief	Clinical		Table	Gloves	Sterile		Stirrups	Embarrassment	Gloves		Stirrups	Gloves	Table
30-44	Female	USA	New Pap smear	No		Prefer not to answer	Middle Atlantic	iOS Phone / Tablet		Cel	BLK	Sat		BLD	TTL	EBT		Cel	TIS	ORG		R B C	W B C	PLT		RBC	WBC	PLT
45-59	Female	AUS	New Pap smear	Yes		30,000 to 59,999	New South Wales	Windows Desktop / Laptop		what	needed	help		hurt	needles	pain		what	needed	woohooo		worry	hurt	needed		new	no hurt	worried
18-29	Female	AUS	New Pap smear	No		Prefer not to answer	Victoria	Windows Desktop / Laptop		i	dont	know		getting	your	vacinations		i	dont	know		i	dont	know		i	dont	know
45-59	Female	AUS	New Pap smear	No		60,000 to 89,999	Northern Territory	Windows Desktop / Laptop		expensive	painful	preventative		HPV vaccination	expensive	doctor		cancer	women	invasive		cancer	doctor	invasive		no idea	doctor	invasive
18-29	Female	USA	New Pap smear	Yes		50,000 to 74,999	East South Central	Android Phone / Tablet		Unnecessary	Proactive	Virus		Dubious	Obscure	Unbelievable		Official	Necessary	Wise		Uncomfortable	Awkward	Necessary		Uncomfortable	Awkward	Innovative
30-44	Female	USA	New Pap smear	No		Prefer not to answer	South Atlantic	Windows Desktop / Laptop		pushed	by	drug ccompany		encouraged	by	drug company		sexually	transmitted	disease		test	for	cancer		not	familiar	new
30-44	Female	AUS	HPV test	Yes		90,000 to 119,999	Victoria	iOS Phone / Tablet		Cancer	Prevention	Vaccine		Hpv	Cancer	Cervix		Cancer	Cervix	Time		Cervix	Pelvis	Test		Cervix	Test	New
60+	Female	AUS	New Pap smear	No		60,000 to 89,999	Queensland	Windows Desktop / Laptop		good	good	good		necessary	good	live		notgood	no	no		ouch	embarrassing	yukky		good	nice	comfortable
30-44	Female	AUS	New Pap smear	Yes		150,000 to 179,999	Queensland	iOS Phone / Tablet		Human	Papilloma	Virus		Prevention	Sti	Needle		Pap	Smear	Gp		Vaginal	Speculum	Pain		Cervical cancer	Speculum	Pain
45-59	Female	AUS	HPV test	No		Prefer not to answer	New South Wales	Windows Desktop / Laptop		warts	needle	sex		needle	teens	sore		warts	sex	penis		invasive	embarrasing	uncomfortable		blood	vagina	uncomfortable
30-44	Female	AUS	HPV test	No		0 to 29,999	New South Wales	iOS Phone / Tablet		Helpful	Scary	Cancer		Lifesaving	Unknown	Cancer		Vagina	Cells	Cervix		Vagina	Publichair	Pubicsmell		vagina	Vulva	Pubichair
30-44	Female	AUS	New Pap smear	Yes		180,000 or more	Queensland	Windows Desktop / Laptop		Important	Reliable	Ineligible		Important	Reliable	Easy		Unfamiliar	Important	Necessary		Uncomfortable	Necessary	Painful (sometimes)		Unfamiliar	Uncomfortable	Reliable
18-29	Female	USA	New Pap smear	Yes		75,000 to 99,999	New England	MacOS Desktop / Laptop		STDs	painful	necessary		painful	necessary	preventative		medical	routine	procedure		cold	necessary	preventative		optimistic	unknown	vague
18-29	Female	AUS	HPV test	No		90,000 to 119,999	New South Wales	Windows Desktop / Laptop		Sex	Needles	Uncomfortable		Cervix	Doctor	Needles		Uncomfortable	Doctor	Vagina		Uncomfortable	Doctor	Vagina		Better	Uncomfortable	Doctor
30-44	Female	USA	New Pap smear	No		Prefer not to answer	New England	iOS Phone / Tablet		Teen	Prevention	STDs		Unaware	Insurance	Prevention		Young	STDs	Prevention		Yearly	Uncomfortable	Necessary		Innovative	Thorough	Insurance
30-44	Female	USA	New Pap smear	No		100,000 to 124,999	East North Central	Windows Desktop / Laptop		adolescent	prevention	uneccessary		prevention	optional	trusted		cancer	cervix	herpes		speculum	pinch	accurate		speculum	test	pinch
60+	Female	AUS	HPV test	No		30,000 to 59,999	South Australia	Windows Desktop / Laptop		unknown	safety	research		unpredictable	no	safety		embarrasment	celebancy	worry		embarrasment	celebancy	worry		embarrasment	encouraging	celebancy
30-44	Female	AUS	New Pap smear	No		Prefer not to answer	New South Wales	Windows Desktop / Laptop		essential	innovative	lifesaver		essential	protector	lifesaver		necessary	mandatory	protection		essential	preventer	mandatory		innovative	state-of-the-art	lifesaver
30-44	Female	USA	New Pap smear	No		75,000 to 99,999	New England	iOS Phone / Tablet		Needle	Injection	Safety		Injection	Impossible	Painful		Teenagers	Stds	HIV		Results	Test	Scrape		Doctor	Exam	Scrape
30-44	Female	USA	HPV test	Yes		75,000 to 99,999	Pacific	iOS Phone / Tablet		Easy	Fast	New		New	Safe	Easy		Easy	Fast	New		Ouch	Uncomfortable	Boo		Easier	Better	Faster
30-44	Female	USA	New Pap smear	Yes		10,000 to 24,999	Middle Atlantic	iOS Phone / Tablet		Good	Teens	Sex		Good	Prevention	Cancer		Scrape	Cells	Cryosurgery		Yearly	Painful	Doctor		Fast	Painful	Quick
18-29	Female	AUS	HPV test	No		Prefer not to answer	New South Wales	MacOS Desktop / Laptop		Important	Necessary	Needle		Needle	Important	Preventative		Smear	Cervix	Health		cervix	vagina	examination		Same	As	Old
18-29	Female	AUS	New Pap smear	Yes		180,000 or more	Victoria	MacOS Desktop / Laptop		no	no	no		no	no	no		no	no	no		no	no	no		no	no	no
18-29	Female	USA	New Pap smear	No		25,000 to 49,999	East North Central	iOS Phone / Tablet		Seriously?	Huh	Nice		Really?	What?	Dope		I	Need	One		Uncomfortable	Tense	Scary		Safer	Smarter	Better
30-44	Female	USA	New Pap smear	No		10,000 to 24,999	West South Central	Android Phone / Tablet		warts	cancer	cure		unknown	shot	fertile		pap smear	condoms	no symptoms		painful	invasive	messy		unaware	interested	expense
45-59	Female	AUS	New Pap smear	No		90,000 to 119,999	Victoria	iOS Phone / Tablet		Good idea	Girls	Boys		Excellent	Should be free	Unisex		pap smear	vaccination	Girls		Awful	Awful	Awful		Better than old one	Less invasive	More exact
18-29	Female	AUS	New Pap smear	Yes		0 to 29,999	New South Wales	Windows Desktop / Laptop		Prevention	Necessary	Convieniant		Prevention	Conveniant	Easy		Screening	Uncomfortable	Necessary		Necessary	Painful	Accurate		Unknown	under advertised	beneficial
60+	Female	AUS	New Pap smear	Yes		30,000 to 59,999	New South Wales	Windows Desktop / Laptop		protection	immunity	peace of mind		necesary	preventative	intrusive		necessary	preventative	protection		necessary	intrusive	boring		necessary	protection	intrusive
45-59	Female	AUS	New Pap smear	No		180,000 or more	South Australia	Windows Desktop / Laptop		useful	easy	quick		necessary	preventative	responsible		reliable	necessary	important		uncomfortable	embarrasssing	neccessary		uncomfortable	necessary	yearly
30-44	Female	USA	HPV test	No		Prefer not to answer	New England	Windows Desktop / Laptop		new	quick	pain free		quick	easy	painless		quick	easy	painless		quick	new	easy		quick	painless	new
30-44	Female	AUS	HPV test	Yes		60,000 to 89,999	New South Wales	Android Phone / Tablet		prevention	infection	sex		health	prevention	illness		lucky	health	treatment		cold	speculum	test		cold	speculum	test
30-44	Female	USA	New Pap smear	No		25,000 to 49,999		iOS Phone / Tablet		Maybe	Every year	Healthy		TRUE	Necessary	Prevention		Year	Consecutive	Necessary		Painfull	Unconfortable	Necessary		Prevention	One year	Vaginal
30-44	Female	AUS	HPV test	Yes		0 to 29,999	New South Wales	iOS Phone / Tablet		STD	Young girls	Painful		STD	Young girls	Painful		Unsure	New	Unheard of		STD	Intrusive	Frightening		Intrusive	Cervical cancer	STD
18-29	Female	USA	HPV test	No		Prefer not to answer	West North Central	iOS Phone / Tablet		Shot	Prevention	Teenager		Shot	Serious	Deadly		Cancer	Results	Detection		Woman	Invasive	Yearly		New	Changed	Different
18-29	Female	USA	New Pap smear	Yes		75,000 to 99,999	South Atlantic	Windows Desktop / Laptop		I	Dont	Know		I	don't	know		Confused	Meh	Eh		Confused	Not	Sure		Confused	What	Ok
30-44	Female	AUS	HPV test	Yes		60,000 to 89,999	New South Wales	iOS Phone / Tablet		Needle	Warts	Teenage		Needle	Vagina	Cells		Warts	Vagina	Cervix		Scrape	Hurts	Cells		No pain	Encouraging	No scrape
30-44	Female	AUS	New Pap smear	No		60,000 to 89,999	New South Wales	iOS Phone / Tablet		Needle	Injection	Immunity		Netheregions	Badness	Needle		Of people	Unsure	Illness		Netheregions	Spread	Check		Not old	Of the netheregions	Spread, scrape
30-44	Female	USA	New Pap smear	No		75,000 to 99,999	East North Central	iOS Phone / Tablet		What	What	What		Another shot	Why	How did this happen		What	What	What		Necessary	Routine	Safeguard		Okay	What is it	Who made it
18-29	Female	AUS	HPV test	Yes		60,000 to 89,999	South Australia	Windows Desktop / Laptop		cancer	ouch	virus		virus	needle	new		cancer	science	nuisance		2yearly	due	cancer		nuisance	compare	cancer
30-44	Female	USA	New Pap smear	No		Prefer not to answer		Windows Desktop / Laptop		Prevention	Teenagers	Helpful		Necessary	Advanced	Prevention		Advanced	Painful	Prevention		Sexual	Women	Passive smoking		Advanced	Early detection	Painful
30-44	Female	AUS	New Pap smear	No		Prefer not to answer	Queensland	Windows Desktop / Laptop		needle	protection	vital		good idea	vital	important		vital	important	necessary		annoying	necessary	painful		same old	still the same	vital
60+	Female	AUS	New Pap smear	No		Prefer not to answer	Victoria	Windows Desktop / Laptop		relief	safe	easy		relief	safe	pleased		pain	embarassment	relief		pain	embarassment	relief		embarassment	pain	relief
18-29	Female	AUS	HPV test	No		0 to 29,999	Western Australia	iOS Phone / Tablet		Needle	Doctor	He		Cancer	Needle	Ouch		Pap	Doctor	Embarassing		Vagina	Doctor	Embarrassing		Vagina	Doctor	Embarrassing
30-44	Female	AUS	HPV test	Yes		90,000 to 119,999	Tasmania	iOS Phone / Tablet		Guardasil	Cervical	Cancer		Guardasil	Hpv	CSL		Pap smear	Warts	Speculum		Speculum	Doctor	Cervix		GP	Hpv	Cervical cancer
60+	Female	AUS	New Pap smear	No		90,000 to 119,999		MacOS Desktop / Laptop		on	f	f		no	no	no		no	no	no		d	s	t		no	no	no
18-29	Female	AUS	New Pap smear	No		0 to 29,999	Queensland	Windows Desktop / Laptop		Doctor	Arm	Cost		Doctor	Arm	Pain		Vaccine	Doctor	Results		Doctor	Awkward	Pain		Cancer	STDs	Better
45-59	Female	AUS	New Pap smear	Yes			New South Wales	iOS Phone / Tablet		New	Improvement	Necessary		Necessary	Easy	Needle		Technology	New	Essential		Discomfort	Embarrassing	Necessary		Good	New	Essential
30-44	Female	USA	New Pap smear	No		25,000 to 49,999	East North Central	Other Phone / Tablet		prevention	young	smart		important	easy	smart		smart	painless	informative		uncomfortable	necessary	important		better	accurate	advancement
30-44	Female	USA	New Pap smear	Yes		75,000 to 99,999	West South Central	Android Phone / Tablet		Young	Three	Done		New	Hpv	Unknown		Precancer	Std	Scary		Annual	Annoying	Must do		Different	Clear	Results
18-29	Female	AUS	New Pap smear	No		Prefer not to answer	New South Wales	Other		cure	resolution	new health test		medication	cure	antibiotic		examination	womens health	health		vaginal examination	medical test	health solution		examination	health	solution
45-59	Female	AUS	New Pap smear	Yes		90,000 to 119,999	Victoria	Windows Desktop / Laptop		injection	youth	warts		injection	hpv	youth		warts	cancer	std		speculum	uncomfortable	doctor		cancer	speculum	doctor
45-59	Female	AUS	HPV test	No		60,000 to 89,999	New South Wales	Windows Desktop / Laptop		great	needed	necessary		ouch	fantastic	overdue		helpful	preventative	overdue		terrifying	uncomfortable	necessary		innovative	great	necessary
30-44	Female	USA	New Pap smear	No		50,000 to 74,999	East North Central	Android Phone / Tablet		prevention	Cancer	std		uncertain	awesome	new		blood	cancer	hpv		vagina	test	clean		different	unsure	question
18-29	Female	AUS	New Pap smear	No		Prefer not to answer	Victoria	MacOS Desktop / Laptop		needle	immunisation	safety		3 times	injection	completed		herpes	warts	vagina		scheduled	important	invasive		whatever	discomfort	test
60+	Female	AUS	New Pap smear	Yes		0 to 29,999	New South Wales	Windows Desktop / Laptop		good	when	help		great	good	soon		why	how	when		test	doctor	necessary		okay	improve	best
60+	Female	AUS	HPV test	No		30,000 to 59,999	Queensland	Other		not	sure	about		painless	easy	safe		dont	know	about		hate	stressful	painful		not	popular	dislike
18-29	Female	AUS	New Pap smear	No		180,000 or more	New South Wales	iOS Phone / Tablet		Good	Free	Proven?		Great	Girls	Doctor		Ubknown	Good	Doctor		Painful	Scary	Necessary		Unknown	Information	Good
18-29	Female	USA	HPV test	No		Prefer not to answer	Pacific	Windows Desktop / Laptop		vaccine	prevention	cancer		prevention	health	vaccine		cervix	cancer	women		test	cancer	women		cervix	cancer	women
30-44	Female	AUS	New Pap smear	Yes		180,000 or more	Victoria	Windows Desktop / Laptop		NA	NA	NA		NA	NA	NA		NA	NA	NA		don't know	NA	NA		NA	NA	NA
18-29	Female	AUS	New Pap smear	No		150,000 to 179,999	Victoria	Android Phone / Tablet		Risky	Cancer	Sexually transmitted diseases		Sex	Sexual transmitted desease	Bacteria		Cancer	Diet	Weight		Diet	Overweight	Hungry		Comfort	Cancer	Child
30-44	Female	USA	HPV test	No		150,000 to 174,999	East North Central	Windows Desktop / Laptop		shot	cure	prevention		innovation	research	science		infection	transmission	sexual		scrape	vagina	exam		old	messy	vagina
30-44	Female	USA	HPV test	Yes		0 to 9,999	Pacific	Android Phone / Tablet		cure	preventative	care		preventative	dr	health		sick (virus)	pain	ouch		pain	dred	uncomfortable		hurt	advanced	ouch
45-59	Female	AUS	New Pap smear	No		30,000 to 59,999	South Australia	iOS Phone / Tablet		Important	Easier	Doctors		Unknown	Doctors	Maybe		Uncomfortable	Embarrassing	Important		Dislike	Uncomfortable	Embarrassing		Unknown	Doctors	Embarrassing
30-44	Female	USA	New Pap smear	No		25,000 to 49,999	South Atlantic	Windows Desktop / Laptop		spread	sexual	confused		unknown	hurt	reliability		quick	simple	worthwhile		uncomfortable	necessary	encouraged		uncomfortable	necessary	beneficial
45-59	Female	AUS	HPV test	No		0 to 29,999	Victoria	MacOS Desktop / Laptop		when	where	now		willing	easier	prevention		prevention	cure	appreciative		neccessary	uncomfortable	dread		uncomfortable	neccessary	important
30-44	Female	USA	New Pap smear	No		10,000 to 24,999	West South Central	Android Phone / Tablet		prevent	safe	healthy		new	odd	save		sex	safe	prevent		help	safe	clean		health	prevention	cervix
18-29	Female	USA	New Pap smear	No		25,000 to 49,999	South Atlantic	Windows Desktop / Laptop		shot	protect	safe		shot	prevent	safe		safe	easy	protect		cold	naked	uncomfortable		test	detect	advanced
18-29	Female	USA	HPV test	Yes		75,000 to 99,999	East North Central	iOS Phone / Tablet		Good	had	free		Good	had	free		Good	uncomfortable	free		Uncomfortable	unnecessary	age		Uncomfortable	unnecessary	age
18-29	Female	AUS	New Pap smear	No		30,000 to 59,999	New South Wales	iOS Phone / Tablet		Cervical	Preventative	Female		Preventative	Teenager	Doctor		Preventative	Doctor	Women		Cervical	Preventative	Cancer		Woman	Preventative	Familiar
45-59	Female	AUS	HPV test	No		Prefer not to answer	Queensland	iOS Phone / Tablet		Young girls	Preventive	Nessasary		Young	Girla	Not for older women		Early	Detection	Cancer		Necessity	Yuk	Have too		Better	Than	The existing one
45-59	Female	AUS	New Pap smear	Yes		90,000 to 119,999	South Australia	Windows Desktop / Laptop		Paralysis	Teenagers	Anotherone?		Unheard	Unknown	Dangerous		What?	Unheard	Why?		Reliable	Known	Annual		Unknown	Unheard	Why
45-59	Female	AUS	HPV test	Yes		60,000 to 89,999	Australian Capital Territory	iOS Phone / Tablet		Easy	Painful	Youth-oriented		Really?	Easy	Youth-oriented		Quick	Gyneanocologist	Accurate		Nuisance	Quick	Biyearly		?	What	New?
60+	Female	AUS	New Pap smear	No		180,000 or more	Victoria	MacOS Desktop / Laptop		human	papiloma	vaccination		cervical	cancer	vaccination		human	papiloma	test		pap	smear	old		new	pap	smear
18-29	Female	AUS	New Pap smear	No		60,000 to 89,999	Western Australia	Windows Desktop / Laptop		Ouch	Time-consuming	uncomfortable		Relief	Ouch	Needle		Neccessary	Uncomfortable	Awkward		Uncomfortable	Yuck	Embarrising		Science	Unsure	Medical
30-44	Female	USA	New Pap smear	Yes		75,000 to 99,999	South Atlantic	iOS Phone / Tablet		Teens	Prevention	Helpful		Helpful	Women	Prevention		Helpful	Scary	Std		Gynecologist	Exam	Speculum		Gynecologist	Annual	Exam
18-29	Female	AUS	HPV test	No		30,000 to 59,999	Victoria	iOS Phone / Tablet		Impottant	Vital	Children		Important	Vutal	Lifesaving		Dangerous	Sexually-transmitted	Infection		Important	Vital	Women		Intriguing	Hopeful	Informative
45-59	Female	AUS	New Pap smear	No		0 to 29,999	South Australia	Windows Desktop / Laptop		No	No	No		No	No	No		Yes	Yes	Yes		Have had	Will have another	Yes		Maybe	Maybe	Maybe
45-59	Female	AUS	HPV test	No		120,000 to 149,999	New South Wales	Windows Desktop / Laptop		unknown	needle	doctors		needle	easy	does it work		contageous	female	problem		uncomfortable	needed	female dr visit		better	improving	better odds
30-44	Female	AUS	New Pap smear	No		Prefer not to answer	New South Wales	Android Phone / Tablet		Doctor	Needle	Medicine		Disease	Fix	Needle		Vagina	Doctor	Test		Vagina	Doctor	Surgery		Better	Doctor	Vagina
30-44	Female	USA	HPV test	Yes		50,000 to 74,999	New England	Windows Desktop / Laptop		good idea	definitely getting it for my kids	any vaccinations are helpful		It doesn't matter what you call it.	I feel the same way about it regardless of the name.	Vaccinations are a good idea.		Same test, different name	Neither name brings up any particular feelings.	It doesn't matter what you call it.		I have no feelings about this.	It is a necessary part of life.	It's just a medical test.		probably same as the old pap smear	I have no particular thoughts on this test.	It doesn't matter what you call it.
18-29	Female	AUS	New Pap smear	No		30,000 to 59,999	Queensland	iOS Phone / Tablet		Same question	Repeated question	Doubled question		HPV	Teenager	Chlamydia		Vagina	Cervical cancer	Pap smear		Two years	Awkward	Doctor		Women	Medicine	Vagina
45-59	Female	AUS	New Pap smear	No		90,000 to 119,999	Victoria	Windows Desktop / Laptop		preventative	scary	infectious		preventative	safe	scary		new	unfamiliar	disease		test	check	care		don't know	anything	about it
30-44	Female	USA	New Pap smear	Yes		50,000 to 74,999	East North Central	Android Phone / Tablet		Daughter	Protect	Wonderful		Great	Too late for me	Game changer		Scary	Embarrassed	Dirty		Cold	Exposed	Painless		Innovative	Scary	Gown
30-44	Female	USA	New Pap smear	No		50,000 to 74,999	West North Central	Android Phone / Tablet		contraversal	shot	always		shot	painful	women		young	blood	treatable		yearly	speculum	testing		ugg	discomfort	fast
45-59	Female	AUS	New Pap smear	No		180,000 or more	Queensland	iOS Phone / Tablet		For older women?	Important	Women		Preventative	Fraser	Important		Question	Ok	Important		Yuk	Important	Sigh		Safer	Painful	Precaution
45-59	Female	AUS	New Pap smear	No		60,000 to 89,999	Queensland	Windows Desktop / Laptop		oach	necessary	prevention		oach	necessary	prevention		necessary	prevention	warning		necessary	preventative	warning		better	preventative	warning
18-29	Female	AUS	New Pap smear	No		Prefer not to answer	Victoria	Windows Desktop / Laptop		unheard-of	unfamilair	painful		unnecessary	doctor	women		new	unfamiliar	unheard-of		invasive	uncomfortable	necessary		better	invasive	necessary
45-59	Female	AUS	New Pap smear	No		180,000 or more	New South Wales	iOS Phone / Tablet		Advanced	Wellbeing	Healthy		Excellent	Helpful	Necessary		Advised	Necessary	Helpful		Necessary	Regular	Helpful		Wonderfull	Breakthrough	Research
30-44	Female	AUS	New Pap smear	Yes		Prefer not to answer	Victoria	iOS Phone / Tablet		Cancer	Prevention	Needle		Cancer	Prevention	Injection		Cancer	Prevention	Std		Cancer	Prevention	Cervical		Cancer	Prevention	Cervical
45-59	Female	AUS	New Pap smear	No		150,000 to 179,999	Queensland	Windows Desktop / Laptop		sharp	hurt	firm		needle	sting	hold		intruesive	vunerable	relief		embaressment	cold	uncomfortable		quick	cold	over
30-44	Female	AUS	New Pap smear	No		Prefer not to answer	New South Wales	Windows Desktop / Laptop		unsafe	sideeffects	uncertainty		sideeffects	safety	effectiveness		detection	injection	safety		safe	detection	precautionary		uninformed	safer	better
30-44	Female	AUS	New Pap smear	Yes		60,000 to 89,999	Western Australia	iOS Phone / Tablet		Warts	Virus	Cervix		Cervix	Uterus	Protection		Cervix	Uterus	Cancer		Cervix	Utetus	Cancer		Cervix	Cancer	Uterus
45-59	Female	AUS	New Pap smear	No		Prefer not to answer	New South Wales	Windows Desktop / Laptop		ouch	needle	necessary		necessary	young	girls		i	don't	know		annual	horrible	necessary		don't	know	yet
30-44	Female	USA	HPV test	No		75,000 to 99,999	East North Central	iOS Phone / Tablet		Smart	Good	No worry		Relived	Smart	No worry		Smart	No worry	Taking care of yourself		Ouch	Scary	Not wanting to go		Relieved	Knowledge	Better test
30-44	Female	USA	New Pap smear	No		25,000 to 49,999	Pacific	iOS Phone / Tablet		Prevention	Important	Health		Think	Prevention	Good		Test	Women	Precancerous		Prevention	Test	Good		Precancerous	New development	Better
45-59	Female	AUS	New Pap smear	No		30,000 to 59,999	Victoria	Android Phone / Tablet		Needle	Sti prevention	Easy		Easy	Quick	Nof uncomfortable		How's it done	Specific	Cost		Uncomfortable	2 years	No female clinics		How different	Test time	When due
45-59	Female	AUS	New Pap smear	Yes		90,000 to 119,999	Queensland	Android Phone / Tablet		avoid	infection	fantastic		prevention	cancer	genital		genital	warts	cancer		regular	prevent	cancer		better	improved	pre cancer
30-44	Female	AUS	New Pap smear	No		30,000 to 59,999	Western Australia	Android Phone / Tablet		Preventative	Only for young girls	Cost		Prevention	Missed	Cost		Preventative	Proven	Easy		Preventative	Important	Uncomfortable		Unsure	Availability	Cost
18-29	Female	USA	New Pap smear	No		Prefer not to answer	East North Central	iOS Phone / Tablet		Interesting	Sketchy	Side effects		Preventative	Scary	Productive		Preventative	Expensive	Useful		Awkward	Preventative	Painful		Preventative	Better	Awkward
45-59	Female	AUS	HPV test	No		0 to 29,999	Queensland	MacOS Desktop / Laptop		needle	unintrusive	quick		sadness	death	scary		new	detection	cancer		cancer	internal	regular		vigina	cancer	introusive
18-29	Female	AUS	HPV test	No		Prefer not to answer	Western Australia	Android Phone / Tablet		cancer	awareness	better		good	sore	needle		new	research	fix		cold	awkward	necessary		better	uncomfortable	regularly
18-29	Female	AUS	New Pap smear	Yes		Prefer not to answer	Western Australia	MacOS Desktop / Laptop		needles	pain	sore		needles	pain	no		deadly	bloodtest	sex		vagina	stinky	awkward		vagina	awkward	safe
30-44	Female	AUS	HPV test	Yes		Prefer not to answer	Western Australia	Android Phone / Tablet		Needle	Preventative	Painful		Needle	Problem	Necessary		Smear	Unpleasant	Required		Yearly	Speculum	Painful		Unfamiliar	Required	Painful
60+	Female	AUS	New Pap smear	No		60,000 to 89,999	South Australia	Windows Desktop / Laptop		unsure	sti	awful		safe	prevention	knowledge		unknown	test	herpes		uncomfortable	yearly	knowledge		different	safe	cure
30-44	Female	AUS	New Pap smear	No		90,000 to 119,999	Victoria	Android Phone / Tablet		Needle	Effects	Proven		Needle	Unsure	Effectiveness		Helpful	Detect	Cancer		Regular	Prevent	Cancer		Detect	Prevent	Cancer
30-44	Female	AUS	New Pap smear	No		Prefer not to answer	Queensland	Windows Desktop / Laptop		annoying	hurting	in the road		annoying	hurting	ouch		annoying	hurting	viral		annoying	in the road	hurting		annoying	in the road	hurting
18-29	Female	USA	New Pap smear	No		0 to 9,999	West North Central	iOS Phone / Tablet		Pain ful	Burns	Needed		Life saver	Needed	Good idea		Scarier	Embarrassing	Needed		Pain ful	Yearly	Needed		Easier	Normal	Less esbarassing
45-59	Female	AUS	HPV test	Yes		0 to 29,999	New South Wales	Android Phone / Tablet		Virus	Vaccination	Protection		Cancer	Vaccination	Protection		Disease	Precancer	Detection		Examination	Precancer	Detection		Examination	Test	Detection
30-44	Female	AUS	HPV test	No		Prefer not to answer	New South Wales	iOS Phone / Tablet		Ouch	Gross	Yuck		L	K	G		Ew	Right	Whatever		Ok	Random	What?		Random	Cool	Discusting
30-44	Female	AUS	New Pap smear	No		150,000 to 179,999	Queensland	iOS Phone / Tablet		No	Idea	What		New	Good	Idea		No	Idea	What		Embarrassment	Necessary	Uncomfortable		New	Better	Still need vaginal exam
18-29	Female	USA	HPV test	Yes		10,000 to 24,999	Pacific	MacOS Desktop / Laptop		nope	nope	nope		No	Idea	here		nope	nope	nope		Awful	Dead	No		nope	nope	nope
18-29	Female	AUS	HPV test	Yes		90,000 to 119,999	Western Australia	Windows Desktop / Laptop		essential	safe	trustworthy		essential	safe	vagina		safe	essential	good		doctor	safe	test		test	good	doctor
18-29	Female	USA	New Pap smear	Yes		0 to 9,999	East North Central	Android Phone / Tablet		Great	Very good	Prevents		Great	Good	Awesome		Saving lives	Std	Bad		Basic	Bad	Generic		Healthy	Saving lives	Detectable
18-29	Female	AUS	New Pap smear	Yes		90,000 to 119,999	Northern Territory	iOS Phone / Tablet		Australian	3 doses	Pre sexual activity		Hpv vaccination	Bad terminology	Immunisation		Serology	Pcr	Dna		Cytology	Speculum	Thin prep		Same as old	Pap smear technique can't change	Haven't been told what is new about it.
30-44	Female	AUS	HPV test	No		30,000 to 59,999	Tasmania	iOS Phone / Tablet		Vaccine	Debate	Twitter		Cervix	History	Vaccine		Test	Doctor	University		Test	Sydney	Advertising		Difference	Capitals	Words
30-44	Female	AUS	HPV test	Yes		90,000 to 119,999	South Australia	MacOS Desktop / Laptop		gardasil	Prevention	effective		Gardasil	HPV	Prevention		Early	Detection	DNA		HPV	Cells	Changes		HPV	Screening	Accurate
45-59	Female	AUS	New Pap smear	No		60,000 to 89,999	Victoria	Windows Desktop / Laptop		medical	hospital	unnerving		scary	needed	relief		stigma	medicalised	scary		uncomfortable	necessary	embarrassing		uncomfortable	necessary	embarrassin
30-44	Female	AUS	New Pap smear	Yes		90,000 to 119,999	New South Wales	MacOS Desktop / Laptop		Necessary	Life-saving	Annoying		Necessary	Life-saving	Annoying		Vital	Life-saving	Good		Annoying	Inconvenient	Vital		Necessary	Life-saving	Good
30-44	Female	AUS	HPV test	No		60,000 to 89,999	Western Australia	iOS Phone / Tablet		Three	Needle	Necessary		Hpv	Gardisil	Necessary		New	Interested	Preventative		Invasive	Painful	Necesaary		Idea	Interested	Non invasive
30-44	Female	AUS	New Pap smear	No		60,000 to 89,999	Queensland	iOS Phone / Tablet		Needle	Unknown	Painful		Unknown	Good	Needle		Vagina	Sickness	Disease		Metal	Awkward	Cold		Unknown	Unsure	Unaware
18-29	Female	AUS	New Pap smear	No		30,000 to 59,999	Australian Capital Territory	Windows Desktop / Laptop		pain	great	free?		painful	queezy	worth it		unsure	worth it	free?		painful	painful	worth it		giant claw	uncomfortable	pain
18-29	Female	USA	New Pap smear	No		25,000 to 49,999	East North Central	Windows Desktop / Laptop		prevention	females	research		preventable	cancerous	help		virus	cancer?	preventable		cancer	prevention	uncomfortable		research	cancer	information
30-44	Female	USA	HPV test	No		0 to 9,999	West South Central	iOS Phone / Tablet		Easy	Preventing	Death		Preventing	Death	Test		Blood	Test	Soft		Pain	Ouch	Why		Breast	Pain	Squeeze
30-44	Female	USA	New Pap smear	No		0 to 9,999	South Atlantic	Windows Desktop / Laptop		pain	shot	chemicals		curious	shot	pain		unknown	curious	doctor		stirrups	gross	needed		unknown	better	helpful
30-44	Female	USA	HPV test	Yes		50,000 to 74,999	Middle Atlantic	Android Phone / Tablet		great	Iifesaving	wonderful		good idea	lifesaving	necessary		scary	necessary	unpleasant		yuck	unpleasant	routine		lipstick on a pig	unpleasant	necessary
18-29	Female	AUS	New Pap smear	No		60,000 to 89,999	New South Wales	iOS Phone / Tablet		Needles	Vagina	Doctor		Needle	Doctor	Women		Cancer	Sex	Melissa		Vagina	Women	Doctor		Doctor	Old	Vagina
45-59	Female	AUS	New Pap smear	No		120,000 to 149,999	South Australia	iOS Phone / Tablet		Good	Important	Prevention		Good	Important	Everyone		Important	Good	Prevetion		Uncomfortable	Necessary	Dread		Uncomfortable	Necessary	Dread
60+	Female	AUS	New Pap smear	No		30,000 to 59,999	Queensland	Windows Desktop / Laptop		best	protective	safe		awkward	intrusive	women		life saving	dangerous	killer		uncomfortable	difficult	intrusive		efficient	effective	easier
30-44	Female	AUS	New Pap smear	Yes		30,000 to 59,999	Victoria	Windows Desktop / Laptop		Concern	Ratio	bad		curious	how	?		unknown	how	workings		remember	time	test		unsure	how	try
18-29	Female	AUS	New Pap smear	No		0 to 29,999	Victoria	iOS Phone / Tablet		What	Injection	Cancer		Needles	Prevent	How		Confused	How	Huh		Awkward	2	Scrap		Is it	Scraping??	Quick?
45-59	Female	AUS	New Pap smear	Yes		90,000 to 119,999	Queensland	iOS Phone / Tablet		C	A	N		N	O	T		N	O	T		B	A	D		N	O	P
30-44	Female	USA	New Pap smear	No		50,000 to 74,999	Mountain	Android Phone / Tablet		Std	Teens	Ineffective		Fake	Ineffective	Expensive		Std	Teens	Untreatable		Painful	Same	Reliable		New	Same	Better
45-59	Female	AUS	HPV test	Yes		120,000 to 149,999	Queensland	MacOS Desktop / Laptop		brilliant	prevent	universal		HPV	girls	good		good	prevent	protect		important	regular	cervix		unsure	attractive	choice
18-29	Female	AUS	HPV test	Yes		0 to 29,999	Victoria	iOS Phone / Tablet		Needle	Shot	Aids		Death	Vagina	Needle		Flower	Bacteria	Disease		Father	Explosion	Lie		Father	Lie	Soda
45-59	Female	AUS	New Pap smear	No		90,000 to 119,999	Queensland	iOS Phone / Tablet		Low pain	Easy to obtain	Free option		Quick	Safe	Painless		Available	Quick results	Confidential		Every 2 years	Female	Nurses have been trained in the procedure		Updated	Covers wider range	Free option
30-44	Female	AUS	New Pap smear	Yes		60,000 to 89,999	Victoria	iOS Phone / Tablet		Contentious	Additional	Easy		Quick	Easy	Additional		Unsure	Potential	Helpful		Yuck	Necessary	Quick		Unsure	Vague	Potential
18-29	Female	USA	New Pap smear	Yes		25,000 to 49,999	East North Central	iOS Phone / Tablet		Side effects	Needles	Long term		Hpv	Long term side effects	Nervous		Speculum	Waiting	Easy		Clinical	Stirrups	Waiting		Greasy	Speculum	Stirrups
18-29	Female	AUS	New Pap smear	No		60,000 to 89,999	New South Wales	iOS Phone / Tablet		Unsure	Prevention	Disease		Prevention	Three doses	Compulsory		Disease	Infection	Detection		Vagina	Uncomfortable	Necessary		Interesting	Necessary	Same
60+	Female	AUS	New Pap smear	Yes		30,000 to 59,999	Western Australia	Windows Desktop / Laptop		Immunity	cancer	safe		Brilliant!	Safer	Cancer		Warts	Cancer	Safe		Cancer	Embarrassing	Clear?		Safer	Clear?	Compulsory
30-44	Female	USA	New Pap smear	No		Prefer not to answer	Pacific	Android Phone / Tablet		papilloma	virus	wart		shot	diagnosis	immunizations		human	papilloma	virus		dpread	ugh	guilt		ugh	ick	disgust
45-59	Female	AUS	HPV test	No		Prefer not to answer	Victoria	Android Phone / Tablet		Needle	Pain	Quicker		Intrusive	Uncomfortable	Needle		Better	Advanced	Modern		Pain	Embarrassing	Uncomfortable		Thorough	Uncomfortable	Invasive
30-44	Female	AUS	HPV test	No		0 to 29,999	Australian Capital Territory	Android Phone / Tablet		unknown	possibility	costly		prevention	costly	alternative		new	unknown	possibility		routine	preventive	measurement		upgraded	similar	possibility
60+	Female	AUS	New Pap smear	Yes		0 to 29,999	Victoria	iOS Phone / Tablet		Given to girls in year 12	Do t agree with this	Not enough time has passed to know if this is safe		Given to girls I. Year 12	Don't agree with this	Not enough research available RE long term problems		Clamidia	Herpes	Vaginal warts		Quick	Easy	Pain free		Sounds good	Better than what is available now	Sounds simple yet gives more informed I formation
30-44	Female	AUS	New Pap smear	No		90,000 to 119,999	Victoria	iOS Phone / Tablet		Less familiar	Unsure	What		Awesome	Needed	Essential		Confusing	Explained	Blah		Old	Dadted	Awkward		Innovative	Refreshing	Needed
30-44	Female	USA	New Pap smear	Yes		50,000 to 74,999	Pacific	iOS Phone / Tablet		Skhvjk	Ljxbkdn	Anxin		Sjdjn	Shin	Sjndb		Cekxn	Rrgxg	Sidhe		Gjvydtfu	Gjvknigf	Sfhub		Xfbbdr	Yrvdc	Dvvvte
30-44	Female	AUS	New Pap smear	Yes		30,000 to 59,999	South Australia	MacOS Desktop / Laptop		effective	reliable	easy		easy	effective	good		easy	reliable	good		neccessity	important	reliable		improved	effective	trustworthy
30-44	Female	USA	New Pap smear	Yes		0 to 9,999	Pacific	iOS Phone / Tablet		Gardisil	Age limit	Require		Gardisil	Yay!	Available?		Pap smear	Yearly	Sex		Yearly	Sex	Screening		Health	Yearly	Uncomfortable
18-29	Female	USA	New Pap smear	Yes		50,000 to 74,999	Mountain	MacOS Desktop / Laptop		not sure	not sure	not sure		not sure	not sure	not sure		not sure	not sure	not sure		not sure	not sure	not sure		not sure	not sure	not sure
30-44	Female	AUS	New Pap smear	Yes		90,000 to 119,999	South Australia	MacOS Desktop / Laptop		overdue	good	resilient		good	manageable	proactive		scary	uncomfortable	unknown		chore	necessity	yuk		gross	uncomfortable	chore
30-44	Female	AUS	New Pap smear	No		120,000 to 149,999	Australian Capital Territory	iOS Phone / Tablet		Prevention	Teenagers	Free		HPV	Prevention	Effective		Prevention	Detection	Invasive		Detection	Prevention	Invasive		Effective	Prevention	Invasive
30-44	Female	AUS	New Pap smear	No		60,000 to 89,999	Australian Capital Territory	Android Phone / Tablet		unsure	hpv??	definition?		prevention	positive	life		unclear	not sure	doctor		regular	uncomfortable	necessary		safer	prevention	live
18-29	Female	AUS	New Pap smear	No		150,000 to 179,999	Victoria	iOS Phone / Tablet		Everyone	Should	Have		Everyone	Should	Have		How	Good's	It		That	Time	Again		How's	It	Different
45-59	Female	AUS	HPV test	No		0 to 29,999	South Australia	Windows Desktop / Laptop		cancer	prevention	medical		cancer	prevention	medical		cancer	preventative	medical		medical	cancer	prevention		cancer	prevention	current
18-29	Female	AUS	HPV test	No		Prefer not to answer	Western Australia	iOS Phone / Tablet		Pain	Prevention	Simple		Pain	Prevention	Price		Sex	Cervix	Pap smear		Eww	Not pleasant	Needed		Uncomfortable	Routine	Needed
30-44	Female	AUS	New Pap smear	No		180,000 or more	Australian Capital Territory	Android Phone / Tablet		cancer	preventation	test		cancer	prevention	vaccination		cancer	preventation	test		cancer	preventation	test		cancer	prevention	test
45-59	Female	AUS	New Pap smear	Yes			New South Wales	iOS Phone / Tablet		Health	Prevent	Disease		Good	Idea	Helpful		Good	Idea	Sex		Not	Much	Fun		Might	Be	Better
18-29	Female	AUS	HPV test	No		Prefer not to answer	Western Australia	Windows Desktop / Laptop		Anal cancer	Vulvar cancer	cervical cancer		Prevention	Cure	Save lives		Prevention	Detect abnormality	Cure		Prevent cervical cancer	Infection	Abnormality		More reliable	Early detection	effective
45-59	Female	AUS	New Pap smear	Yes		Prefer not to answer	South Australia	iOS Phone / Tablet		Booster	Pain	Virus		New	Good	Daughter		Virus	Test	Doctor		Smear	Embarassing	Doctor		Smear	Embarassing	Doctor
45-59	Female	AUS	New Pap smear	No		Prefer not to answer	New South Wales	MacOS Desktop / Laptop		prevention	costs	availability		prevention	family	costs		information	costs	risks		prevention	time	results		funding	availability	prevention
30-44	Female	USA	HPV test	Yes		50,000 to 74,999	West North Central	iOS Phone / Tablet		Preventative	New	Shot		Hpv	Shot	Preventative		Std	Genital warts	Permanent		Normal	Female	Doctor		Regular	Metal	Vagina
30-44	Female	AUS	HPV test	Yes		180,000 or more	South Australia	MacOS Desktop / Laptop		cervical cancer	females	prevention		females	needles	prevention		cervical cancer	cancer	smear		doctor	cervical cancer	female		cervical cancer	doctor	HPV
45-59	Female	AUS	New Pap smear	No		Prefer not to answer	South Australia	Windows Desktop / Laptop		available	old	young		available	cure	female		unsure	cure	old		proven	test	old		new	test	availalbe
30-44	Female	USA	HPV test	No		50,000 to 74,999	Middle Atlantic	Android Phone / Tablet		Unnecessary	Painful	Interesting		Necessary	Relevant	Disgusting		Necessary	Painful	Disturbing		Embarrassing	Painful	Necessary		Different	Interesting	Painful
45-59	Female	AUS	HPV test	Yes		Prefer not to answer	Western Australia	iOS Phone / Tablet		Good	Quick	Non-invasive		Good	Non-invasive	Quick		Unknown	Invasive	Uncomfortable		Hurt	Uncomfortable	Embarrassing		Uncomfortable	Invasive	Hurts
18-29	Female	AUS	New Pap smear	No		Prefer not to answer	Victoria	Android Phone / Tablet		ouch	medical	unenjoyable		woman	health	check up		medical	hospital	doctor		routine	woman	vaginal		better	technology	easy
30-44	Female	USA	New Pap smear	No		200,000 and up	West South Central	Windows Desktop / Laptop		women	prevention	how necessary		scary	who needs this	can it realy work		preventative	annually	cost		gross	old fashioned	not conversational		sounds better	less invasive	same as HPV
45-59	Female	AUS	New Pap smear	No		120,000 to 149,999	Australian Capital Territory	Android Phone / Tablet		aids	against what	STD		positive	cure	easy		HIV	STD	infectious		routine	semi accurate	standard		accurate	scientific	precise
18-29	Female	AUS	New Pap smear	No		90,000 to 119,999	Victoria	Android Phone / Tablet		prevention	possible side effects	hopefully effective		same as hpv vac	hopefully effective	prevention		unsure	preventative	dont know anything about it		awkward	preventative	important		better	cervical	vagina
30-44	Female	AUS	HPV test	No		60,000 to 89,999	Victoria	Android Phone / Tablet		what does it involve	needles?	protection?		protection	age barrier	long term effects		herpes	cancer	pap smear		uncomfortable	awkward	unreliable results		haven't heard	no information	dr not mentioned
45-59	Female	AUS	New Pap smear	No		60,000 to 89,999	Victoria	Windows Desktop / Laptop		ouch	saves lives	prevents cancer		ouch	saves lives	prevents cancer		warts	ouch	uncomfortable		ouch	extremely uncomfortable	embarassing		ouch	prevents cancer	uncomfortable
30-44	Female	USA	New Pap smear	Yes		10,000 to 24,999	Mountain	iOS Phone / Tablet		Teenager	Good	Prevention		Ok	Important	Teenager		Must	Detection	Helps		Painful	Necessary	Dread		Necessary	Nicer	Dread
30-44	Female	AUS	HPV test	No		60,000 to 89,999	Tasmania	Android Phone / Tablet		new	alternative	okay		great	idea	now		smear	test	cervical		cold	metal	embarrassing		could	be	okay
60+	Female	AUS	New Pap smear	No		Prefer not to answer	Australian Capital Territory	MacOS Desktop / Laptop		warts	sexually transmitted	needle		cervix	prevention	needle		Human	Warts	sex		cells	vaginal exam	cancer		test	vaginal	new
18-29	Female	AUS	HPV test	Yes		0 to 29,999	Victoria	Windows Desktop / Laptop		Needle	Cancer	Nurse		Needle	Cancer	Ouch		Swab	Cancer	Clinic		Scrapey	Swab	test		Cancer	Scrapey	Swab
18-29	Female	AUS	New Pap smear	Yes		0 to 29,999	Tasmania	MacOS Desktop / Laptop		16 and 18	cervical cancer	warts		HPV	Not entire coverage	Teenagers		DOn't know	Don't know	Don't know		Speculum	Cervical cancer	2 years		Don't know	Don't know	Don't know
45-59	Female	AUS	New Pap smear	Yes		30,000 to 59,999	Queensland	Windows Desktop / Laptop		needle	STD	results		needle	needed	proventative		necessary	vaginal	evasive		painful	invasive	necessary		vaginal	speculum	painful
30-44	Female	AUS	New Pap smear	No		90,000 to 119,999	New South Wales	Windows Desktop / Laptop		three	expensive	useful		does	this	exist?		preventative	protection	cancer		health	speculum	uncomfortable		Pap smear	improved	health
30-44	Female	AUS	New Pap smear	Yes		90,000 to 119,999	Victoria	iOS Phone / Tablet		Cervical cancer	Pap smear	Herpes		Injection	Safety	Protection		Cervical cancer	Stds	Herpes		Cold	2years	Sexually active		Smarter	More reliable	More comfortable
30-44	Female	AUS	HPV test	Yes		60,000 to 89,999	Western Australia	Windows Desktop / Laptop		good	modern	nessitity		scary	hurts	immunication		scary	yuck	awful		invasive	uncomfortable	neceassry		innovation	non invasive	safe
30-44	Female	AUS	New Pap smear	No		Prefer not to answer	New South Wales	iOS Phone / Tablet		Ouch	What's that	Car		Health	Life	Prolong		Big	Medical	Sickness		Yuck	Personal	Discomfort		Nothing	Uninterest	Bore
18-29	Female	AUS	New Pap smear	No		60,000 to 89,999	South Australia	Windows Desktop / Laptop		human	virus	vaccination		cervical	cancer	vaccination		h	p	v		chore	pap	smear		new	pap	smear
60+	Female	AUS	New Pap smear	Yes		30,000 to 59,999	New South Wales	Windows Desktop / Laptop		didn't	see any	form - problem with survey		can't	see	form		can't	see	form		No form	to comment	on - problem with survey		sorry but	there was	no information
45-59	Female	AUS	New Pap smear	Yes		90,000 to 119,999	South Australia	iOS Phone / Tablet		Young	Prevention	Good		Unknown	Good	Prevention		Prevention	Detection	Life		Vagina	Doctor	Undignified		Same	Undignified	Essential
45-59	Female	AUS	New Pap smear	Yes		Prefer not to answer	New South Wales	iOS Phone / Tablet		Excellent	Important	Youth		Excellent	Youth	Important		Good	Helpful	Female		Important	Fine	Annual		New	Better	Female
18-29	Female	AUS	HPV test	No		30,000 to 59,999	Queensland	iOS Phone / Tablet		Safe	Preventing	Fix		Disease	Preventive	Cancer		Infection	Illness	Docorr		Test	Cancer	Illness		Cancer	Doctor	Test
45-59	Female	AUS	HPV test	No		90,000 to 119,999	Western Australia	Android Phone / Tablet		discomfort	protection	hurt		prevention	cancer	discomfort		ptevention	diagnosis	discomfort		discomfort	cancer	diagnosis		not sure	ptevention	discomfort
45-59	Female	AUS	New Pap smear	Yes		30,000 to 59,999	South Australia	Windows Desktop / Laptop		can't hurt	might not help	worth a try		Can't hurt	willing to try	May not help		can't hurt	worth a try	might not help		awkward	embarressing	dread		Same, same	Still uncomfortable	how differnt can it be?
60+	Female	AUS	New Pap smear	Yes		30,000 to 59,999	Victoria	Android Phone / Tablet		Can	Choose	It		Need	It	Done		Need	Do	It		Need	Do	It		Must	Do	It
18-29	Female	AUS	New Pap smear	No		0 to 29,999	New South Wales	Android Phone / Tablet		Needles	Less painful	Test		Needle	Hurt	Vagina		Needle	Results	Cancer		Vagina	Test	Examination		Results	Improved	Test
30-44	Female	AUS	New Pap smear	No		180,000 or more	New South Wales	iOS Phone / Tablet		Ouch	Needle	HPV		Needles	Cancer	Nope		Viral	Testing	Specimens		Ouch	Hurt	Icky		Ouch	Yuck	Wondering
45-59	Female	AUS	HPV test	No		Prefer not to answer	Western Australia	Windows Desktop / Laptop		protection	safety	necessary		necessary	safe	protection		safe	essential	medical		invasive	essential	disliked		protection	invasive	necessary
30-44	Female	AUS	New Pap smear	No		60,000 to 89,999	New South Wales	iOS Phone / Tablet		Great	Free	School		Great	Free	School		Great	Free	Schiol		Dated	Cold	Uncomfortable		Updated	Clinic	Waiting room
18-29	Female	AUS	New Pap smear	Yes		90,000 to 119,999	Queensland	iOS Phone / Tablet		Good	Cervical cancer	Women		Important	Females	Good		Good	Helpful	Important		Awkward	Important	Two years		New	Innovation	Good
45-59	Female	AUS	HPV test	Yes		180,000 or more	Victoria	Windows Desktop / Laptop		essential	girls	boys		important	girls	teenagers		essential	girls	screening		screening	women	important		screening	important	non-HPV cancer
18-29	Female	AUS	New Pap smear	Yes		60,000 to 89,999	Western Australia	Windows Desktop / Laptop		free	high school	prevention		HPV	high school	free		unsure	unsure	unsure		women	doctor	sexually active		unsure	detection	prevention
30-44	Female	AUS	New Pap smear	No		Prefer not to answer	Western Australia	Android Phone / Tablet		Needle	Prevent	Virus		How	Great	Helpful		Warts	Blood	Check		Uncomfortable	Awkward	Painful		Clueless	Aas	Aas
18-29	Female	AUS	New Pap smear	No		Prefer not to answer	Queensland	iOS Phone / Tablet		Needles	Injection	Helpful		Injections	Vagina	Needles		Don't	Know	Stuff		Embarrassing	Uncomfortable	Needed		Painful	Improved	Detectable
30-44	Female	AUS	HPV test	Yes		60,000 to 89,999	Queensland	Windows Desktop / Laptop		Teenagers	Harmful?	Needles		Unknown	Doctor	Good		Painful	Uncomfortable	Necessary		Doctor	Embarrasing	Uncomfortable		Unknown	Uncertain	Discussion
45-59	Female	AUS	New Pap smear	No		180,000 or more	Western Australia	Windows Desktop / Laptop		sexual	preventative	cancer		new	live saving	easy		STD	precancerous	live saving		necessary	uncomfortable	live saving		uncomfortable	necessary	live saving
18-29	Female	AUS	New Pap smear	No		60,000 to 89,999	Western Australia	iOS Phone / Tablet		Prevent	Sex	Early		Prevention	Early	Needles		Human	Cancer	Smear		Test	Problems	Help		Improved	Cancer	Early
30-44	Female	AUS	HPV test	Yes		Prefer not to answer	South Australia	Android Phone / Tablet		unsure	uneducated	education		scared	unsure	unknown		easier	accurate	safer		common	familiar	known		familiar	accurate	safer
18-29	Female	AUS	New Pap smear	No		150,000 to 179,999	Western Australia	iOS Phone / Tablet		Needle	Repetitive	Painful		Needles	Necessary	Life-saving		Serious	Invasive	Time-Consuming		Invasive	Scary	Necessary		New	Advanced	Helpful
45-59	Female	AUS	New Pap smear	No		120,000 to 149,999	Victoria	Windows Desktop / Laptop		protection	female	male		protection	safe	effective		easy	safer	protection		women	2 yearly	uncomfortable		safer	protection	vital
45-59	Female	AUS	HPV test	No		Prefer not to answer	Queensland	Windows Desktop / Laptop		never	had	old		no	needle	help		never	had	it		again	no	hate it		again	hate it	ok
18-29	Female	AUS	HPV test	No		120,000 to 149,999	Victoria	Android Phone / Tablet		Disease	Medicine	Injection		Injection	Unpleasant	Warranted		Uncomfortable	Needed	Medical		Uncomfortable	Needed	Invasive		Curious	Yearly	Uncomfortable
18-29	Female	USA	New Pap smear	No		75,000 to 99,999	West South Central	iOS Phone / Tablet		Risky	Needles	Preventative		Life	Death	Age		Women	Health	Insurance		Women	Vagina	Health		Advanced	Vagina	Tool
30-44	Female	AUS	HPV test	Yes		120,000 to 149,999	New South Wales	Windows Desktop / Laptop		prevention	good	cancer		prevention	good	HPV		prevention	good	sex		prevention	good	cancer		prevention	good	cancer
18-29	Female	AUS	New Pap smear	No		30,000 to 59,999	Queensland	Windows Desktop / Laptop		priority	dear	great		surprised	worthwhile	dear		hurtful	useful	priority		hurtful	worry	scared		hurtful	similar	proven
30-44	Female	AUS	New Pap smear	No		0 to 29,999	New South Wales	Android Phone / Tablet		safe	healthy	prevention		safe	healthy	prevention		sick	doctor	std		uncomfortable	necessary	healthy		curious	prevention	uncomfortable
45-59	Female	AUS	New Pap smear	Yes		Prefer not to answer	Tasmania	Windows Desktop / Laptop		ouch	necessary	good		awesome	interesting	progress		great	current	common		embarassing	confronting	needed		safety	biannual	necessary
45-59	Female	AUS	New Pap smear	No		0 to 29,999	Western Australia	Windows Desktop / Laptop		uncomfortable	uncomfortable	uncomfortable		excellent	excellent	excellent		uncomfortable	uncomfortable	uncomfortable		pain	in	ass		uncomfortable	uncomfortable	uncomfortable
45-59	Female	AUS	New Pap smear	No		30,000 to 59,999	New South Wales	Windows Desktop / Laptop		lasting	find	welcomed		desease	cervics	external		human	virus	test		vaginal	test	uncomfortable		studies	new	detect
30-44	Female	AUS	New Pap smear	No		Prefer not to answer	Queensland	Windows Desktop / Laptop		vaccine	assurance	prevention		prevention	cancer	treatment		disease	test	transmitted		test	old	smear		improved	technology	safety
45-59	Female	AUS	New Pap smear	No		180,000 or more	New South Wales	MacOS Desktop / Laptop		new	prevention	needle		needle	cervix	cancer		warts	cervix	transmitted		yearly	cervix	doctors		new	better	cancer
30-44	Female	AUS	New Pap smear	No		60,000 to 89,999	Victoria	Windows Desktop / Laptop		Prevention	injection	help		opertunity	helpful	prevention		PAP	Doctor	Regular		uncomfortable	intimate	necessary		better	concise	useful
30-44	Female	AUS	New Pap smear	No		Prefer not to answer	New South Wales	Windows Desktop / Laptop		safe	good	easy		Good idea	Teenagers	Prevention		Pap Smear	Cervical Cancer	Safe		uncomfortable	embarrassing	painful		better	early detection	safe
45-59	Female	AUS	New Pap smear	Yes		30,000 to 59,999	Queensland	Android Phone / Tablet		Young	Female	Girl		Great	Life	Saver		Yuk	Delay	Killer		Yuk	Put	Off		Unknown	Unsure	Yuk
18-29	Female	AUS	New Pap smear	No		0 to 29,999	New South Wales	iOS Phone / Tablet		Needle	Hope	Death		Pain	Hope	Loss		Human	Vaccination	Cancer		Confused	Hard	Scary		Pain	Confused	Potato
18-29	Female	AUS	New Pap smear	No		Prefer not to answer	Victoria	MacOS Desktop / Laptop		Cautious	Safe	Reluctant		Needed	Cautious	relevance?		Clinical	Uncertain	Unsure		uncomfortable	Gross	Awkward		Gross	Personal	Uncomfortable
18-29	Female	AUS	New Pap smear	Yes			Victoria	iOS Phone / Tablet		Vaccine	Cervical	Needle		Vaccine	Needle	Hpv		Warts	Pap smear	Cancer		Bed	Doctor	Speculum		Pap	Speculum	Smear
18-29	Female	AUS	HPV test	No		60,000 to 89,999	Queensland	MacOS Desktop / Laptop		unknown	different	new		precaution	free	tested		new	unknown	different		uncomfortable	necessary	regular		uncomfortable	necessary	better
30-44	Female	AUS	HPV test	Yes		90,000 to 119,999	Queensland	iOS Phone / Tablet		Adolescent	Cervical	Cancer		Women	HPV	Health		Cancer	Cervical	Smear		Women	Health	Cancer		Cervical	Cancer	Speculum
30-44	Female	USA	New Pap smear	No		75,000 to 99,999	Pacific	Android Phone / Tablet		warts	colliflowet	dry		bullshit	so	control		waste	gross	freeze		speculum	stirrups	naked		interesting	want	try
30-44	Female	AUS	New Pap smear	No		180,000 or more	Victoria	iOS Phone / Tablet		Only for young people	Injection	Too late		Is there one?	Injection?	Ouch		Invasive	Important	Smear		Invasive	Important	Overdue		Invasive	Important	Smear teat
45-59	Female	AUS	New Pap smear	Yes		Prefer not to answer	New South Wales	Windows Desktop / Laptop		preventative	anxiety	mandatory		preventative	easy	compulsory		invasive	embarrasing	uncomfortable		invasive	painful	embarrasing		invasive	painful	uncomfortable
45-59	Female	AUS	New Pap smear	Yes			South Australia	Windows Desktop / Laptop		virus	sexually transmitted	youth		necessary	modern	progressive		yuck	new	needed		yuck	yuck	yuck		unknown	questions	unanswered
30-44	Female	AUS	HPV test	No		60,000 to 89,999	Victoria	MacOS Desktop / Laptop		great	valuable	improvement		improvement	necessary	valuable		beneficial	improvement	great		uncomfortable	avoid	necessary		better	beneficial	improvement
45-59	Female	AUS	HPV test	Yes		30,000 to 59,999	South Australia	Windows Desktop / Laptop		better	cancer	detection		great	ealry	detectiom		sexually	cancer	best		cancer	cervical	early		detection	cancer	better
60+	Female	AUS	New Pap smear	No		90,000 to 119,999	Queensland	iOS Phone / Tablet		Relevant	For	Males		Relevant	For	Males		Good	For	Research		Reinforces	Healthy	Feeling		Less	Embarrassing	Personally
18-29	Female	AUS	New Pap smear	No		90,000 to 119,999	Victoria	iOS Phone / Tablet		Young	Prevention	Needle		Needle	Prevention	Doctor		Doctor	Testing	Prevention		Doctor	Test	Uncomfortable		Better	Advanced	Clinic
18-29	Female	AUS	New Pap smear	No		150,000 to 179,999	Victoria	iOS Phone / Tablet		Unknown	Buttrfly	Doctor		Probe	Smart	Easy		Same	Surgery	Table		Clean	Instrument	Vagina		New	Same	More
30-44	Female	AUS	HPV test	Yes		60,000 to 89,999	Queensland	iOS Phone / Tablet		Safe	Non transmitted	Informative		Fantastic	Where	When		Unsure	Worried	Paid		Spoons	Cold	Evasive		Helpful	Preventative	Results
45-59	Female	AUS	New Pap smear	No		60,000 to 89,999	Tasmania	Windows Desktop / Laptop		good idea	too old	prevention		good idea	too old	prevention		vaccine	herpes	young women		vagina	cancer test	speculum		vagina	cancer test	speculum
60+	Female	AUS	HPV test	No		30,000 to 59,999	Western Australia	Windows Desktop / Laptop		preventative	positive	easy		godsend	simple	Australian		preventative	necessary	simple		tried	TRUE	worthwhile		helpful	progressive	current
18-29	Female	AUS	New Pap smear	Yes		Prefer not to answer	Victoria	Windows Desktop / Laptop		Vagina	Shot	Pain		Shot	pain	Cancer		Vagina	Result	disease		I	don't	understand		This	one	also
30-44	Female	USA	New Pap smear	No		200,000 and up	Middle Atlantic	iOS Phone / Tablet		Preventative	Fast	Duration		Unclear	Helpful	Process		Useful	Annual	Informative		Useful	Easy	Knowledgable		Progressive	Preventative	Annual
45-59	Female	AUS	New Pap smear	No		30,000 to 59,999	South Australia	Windows Desktop / Laptop		health	safety	cancer		i	dont	know		pap smear	health check	cancer		safety	prevention	cancer		early detection	health	confidence
30-44	Female	AUS	New Pap smear	No		60,000 to 89,999	South Australia	iOS Phone / Tablet		Essential	Research	Aiming toward prevention.		Necessity	Research	Survival		Research	Prevention -aiming for	Survival		Required	Uncomfortable but has purpose	Not very often		Innovation	Important	Worthy
30-44	Female	USA	New Pap smear	No		10,000 to 24,999	South Atlantic	iOS Phone / Tablet		Needle	Prevention	Doctor		Wonderful	Safety	Medication		Disease	Cancer	Doctor		Uncomfortable	Doctor	Cold		Uncomfortable	Necessary	Safer
30-44	Female	USA	HPV test	No		25,000 to 49,999	East South Central	Android Phone / Tablet		scared	of	it		I	need	one		have	no	clue		scared	to	get		I	need	one
45-59	Female	AUS	New Pap smear	Yes		90,000 to 119,999	Victoria	Windows Desktop / Laptop		teenagers	prevention	vital		breakthrough	pap smear	youth		Cancer	STI	prevention		necessary	screening	prevention		screening	prevention	same
30-44	Female	USA	New Pap smear	Yes		10,000 to 24,999	East North Central	Android Phone / Tablet		what	how	undeestand		usual	necessary	risky		exam	over	prevent		uncomfortable	painful	hurts		different	unknown	doubtful
18-29	Female	USA	New Pap smear	No		Prefer not to answer	New England	Windows Desktop / Laptop		what	real?	helpful?		what	real?	lol		important	good	helpful		important	helpful	alright		good	helpful	smart
30-44	Female	USA	New Pap smear	Yes		200,000 and up	New England	MacOS Desktop / Laptop		new	routine	young		fantastic	life-saving	modern		great	helpful	life-saving		necessary	traditional	useful		new	accurate	cutting-edge
30-44	Female	USA	New Pap smear	No		25,000 to 49,999	South Atlantic	iOS Phone / Tablet		Vaccines	Limited	Unknown		Limited	Vaccines	Pharmaceuticals		Cervical cancer	Sti	Warts		Annual	Gyno	Speculum		Tested?	Never heard of it	Old pap smear
30-44	Female	USA	New Pap smear	No		10,000 to 24,999	West North Central	Android Phone / Tablet		Teens	Great	Daughter		Great	Company	Session		Good	Time	Everything		Yeahh	Hurt	Due		Difference	When	How
18-29	Female	USA	New Pap smear	Yes		25,000 to 49,999	Mountain	iOS Phone / Tablet		Shot	Prevention	Smart		Shot	Shot	Shot		Aids	Illness	Sick		Check up	Check up	Yearly exam		Smart	Exam	Yearly check up
18-29	Female	AUS	New Pap smear	No		60,000 to 89,999	Victoria	Android Phone / Tablet		Needle	Cancer	Cervical		Needle	Prevention	HPV		Cancer	Screening	Prevention		Uncomfortable	Old	Women		Uncomfortable	New	Better
45-59	Female	AUS	New Pap smear	No		90,000 to 119,999	Victoria	iOS Phone / Tablet		Necessary	Modern	Nee		Preventative	Effective	Modern		Essential	Reliable	Detectable		Necessary	Dreaded	Effective		Efficient	Accurate	Mosern
30-44	Female	USA	HPV test	Yes		75,000 to 99,999	New England	Windows Desktop / Laptop		once	early	want		helpful	once	want		test	annual	helpful		ouch	hurts	necessary		annual	again	ouch
30-44	Female	USA	HPV test	Yes		25,000 to 49,999		Windows Desktop / Laptop		gardasil	for pre teens	protection		gardasil	prevention	cancer free		early stages	cancer free	cervical cancer		early stages	pre cancer	treatment		early stages	pre cancer	early treatmen
30-44	Female	USA	New Pap smear	No		25,000 to 49,999	New England	Android Phone / Tablet		Mankind	Shot	Fluid		Women	Ugly	Protect		Person	Health	Results		Protection	Swab	Testing		Great	Cervix	Test
30-44	Female	USA	New Pap smear	No		Prefer not to answer	West South Central	Android Phone / Tablet		no way	pointless	painful		no way	waste money	pharmaceutical companies suck		why	waste	time		painful	scare tactic	pointless		painful	not doing it	dumb
18-29	Female	AUS	New Pap smear	Yes		0 to 29,999	Western Australia	Windows Desktop / Laptop		needles	ugh	another vaccination		no	why	helpfull		interesting	willing to try	different		annoying	needed	helpful		interesting	nervous	uninviting
18-29	Female	AUS	New Pap smear	No		Prefer not to answer	Victoria	MacOS Desktop / Laptop		Needle	Prevention	Cost		Prevention	Needle	Cost		Detection	Action	Cost		Swab	Test	Detection		Detection	Prevention	Cost
30-44	Female	USA	New Pap smear	No		25,000 to 49,999	East North Central	iOS Phone / Tablet		Ok	So	Good		Ok	Cool	Stress		No	Weird	Not good		Ok	Good	No		Ok	Good	No way
30-44	Female	USA	New Pap smear	Yes		10,000 to 24,999	Mountain	iOS Phone / Tablet		Scary	Under tested	Mandatory		Cancer is bad	Forethought	Concern		Scary	Under tested	Unsure		Nasty	Painful	Archaic		Still bad	Painful	No improvement
30-44	Female	AUS	New Pap smear	No		60,000 to 89,999	Queensland	iOS Phone / Tablet		Prevention	Easy	Simple		Prevention	Simple	Cost effective		Confused	Unknown	What		Uncomfortable	Invasive	Time consuming		Better	Uncomfortable	Expensive
18-29	Female	AUS	HPV test	No		Prefer not to answer	New South Wales	iOS Phone / Tablet		Life saving	Prevention	Cancer		Prevention	Breakthrough	Life saving		Detection	Test	Results		Detection	Test	Results		Test	Improvement	Advancement
30-44	Female	USA	New Pap smear	No		75,000 to 99,999	East North Central	iOS Phone / Tablet		Positive	Underused	Necessary		Positive	Underused	Questions		Unfamiliar	Questions	Interesting		Health	Uncomfortable	Overdue		Unfamiliar	Hopeful	Wuestions
45-59	Female	AUS	New Pap smear	No		Prefer not to answer	Western Australia	MacOS Desktop / Laptop		INJECTION	PROBLEM	UNCERTAINTY		FAD	POSSIBILITIES	YOUNG		VIRUS	INJECTION	CONCERN		TEST	UNCOMFORTABLE	INCONVENIENT		TECHNOLOGY	IMPROVEMENT	RESULTS
30-44	Female	AUS	New Pap smear	No		30,000 to 59,999	New South Wales	MacOS Desktop / Laptop		expensive	unsafe	unneccessary		unproven	expensive	maybe		important	simple	necessary		important	uncomfortable	embarrassing		important	life-saving	essential
30-44	Female	USA	New Pap smear	No		25,000 to 49,999	New England	iOS Phone / Tablet		Human	Pap	Virus		Serum	Shot	Injection		Speculum	Slab	Smear		Speculum	Cervical	Smear		Hum	Pap	V
30-44	Female	USA	New Pap smear	No		25,000 to 49,999	West North Central	Android Phone / Tablet		unproven	pushy	infiltrative		imaginary	pink elephant	lie		pushy	unproven	everyone has it		uncomfortable	questionable results	disgusting		wishful thinking	same old, same old	only if it's more comfortable
30-44	Female	USA	New Pap smear	Yes		50,000 to 74,999	Middle Atlantic	iOS Phone / Tablet		Yes	No	Yes		No	Yes	No		Yes	No	No		Yes	No	Yes		Yes	Yes	No
18-29	Female	USA	HPV test	No		50,000 to 74,999	Middle Atlantic	iOS Phone / Tablet		Gardasil	Arm	Cervix		Hpv	Gardasil	Arm		Std	Cancer	Cervix		gynecologist	Cervix	Vagina		Hpv	Cervix	Vagina
18-29	Female	AUS	HPV test	No		30,000 to 59,999	Western Australia	Android Phone / Tablet		aids	immune	good		cancer	cervix	bad		test	aids	detect		vaginal	examination	scary		different	safe	good
18-29	Female	USA	New Pap smear	No		175,000 to 199,999	Middle Atlantic	Windows Desktop / Laptop		one less	commercial	new		good	helpful	necessary		good	new	helpful		gross	unpleasant	necessary		unsure	better	new
30-44	Female	USA	HPV test	Yes		25,000 to 49,999	New England	Windows Desktop / Laptop		warts	bumps	cancer		growth	scary	women		warts	bumps	cancer		bagel	gel	cold		bagel	gel	clear
18-29	Female	USA	New Pap smear	No		Prefer not to answer	Middle Atlantic	MacOS Desktop / Laptop		hard	to	schedule		possible?	expensive	what.		confusing	expensive	optional		invasive	necessary	weird.		invasive	necessary	weird
30-44	Female	AUS	New Pap smear	No		0 to 29,999	Western Australia	iOS Phone / Tablet		Needles	Vaccines	Health centre		Vagina	Needle	Family		Guinea pig	Diseases	Humans		Vagina	Embarrassing	Doctor		Comfortable	Non invasive	Better
30-44	Female	USA	HPV test	Yes		25,000 to 49,999	South Atlantic	MacOS Desktop / Laptop		relaxed	empowered	safe		relief	relaxed	empowered		uncomfortable	anxiety	nervous		anxiety	uncomfortable	nervous		anxiety	nervous	discomfort
30-44	Female	USA	HPV test	No		50,000 to 74,999	East North Central	iOS Phone / Tablet		Useful	Important	Necessary		Important	Useful	Necessary		New	Good	Better		Old	Antiquated	Wrong		Better	Innovative	New
18-29	Female	USA	New Pap smear	No		25,000 to 49,999	South Atlantic	Windows Desktop / Laptop		not chronic	test	awesome		pap test	rare	treatment		warts	infection	vaccine		gross	OBGYN	fast		radiation	survery	found early
30-44	Female	USA	New Pap smear	Yes		75,000 to 99,999	Middle Atlantic	Windows Desktop / Laptop		good	hope	save		good	hope	save		gross	sick	scary		pain	uncomfortable	gross		hopeful	uncomfortable	scary
45-59	Female	AUS	HPV test	No		Prefer not to answer	Victoria	iOS Phone / Tablet		Great	Easy	Convienent		Marvellous	Easy	Simple		Pallips	Scarey	Feel dirty		Nuisance	Uncomfortable	Necessary		Uncomfortable	Embarrasing	Not pleasant
18-29	Female	AUS	New Pap smear	No		Prefer not to answer	Victoria	Android Phone / Tablet		Sickness	Prevention	Woman		Helpful	Lifesaver	Needed		Indifferent	Needles	Results		Awkward	Effective	Needed		Accuracy	Innovation	Awkward
45-59	Female	AUS	HPV test	No		30,000 to 59,999	Victoria	Windows Desktop / Laptop		good	for	humanity		great	idea	best		better	prevention	good		annoying	but	necessary		probably	okay	good
18-29	Female	AUS	HPV test	No		60,000 to 89,999	Western Australia	Android Phone / Tablet		Needle	Effective	Cancer		Needle	Nervous	HPV		Cancer	STD	Pap smear		Awkward	Quick	Painless		Unsure	Awkward	Interested
30-44	Female	USA	New Pap smear	No		75,000 to 99,999	West North Central	Android Phone / Tablet		Neutral	Young	Qualify		Hope	Survival	Prevention		Venereal	Illness	Exam		Uncomfortable	Necessary	Awkward		speculum	Office	Laboratory
30-44	Female	USA	New Pap smear	No		50,000 to 74,999	West North Central	Windows Desktop / Laptop		dirty	bumpy	reckless		cervical	cancer	vaccination		dirty	risky	bumpy		vagina	pap	smear		new	pap	smear
30-44	Female	USA	New Pap smear	No		75,000 to 99,999	New England	Android Phone / Tablet		Hesitant	Unnecessary	Std		Validity	Effective	New		Std	Precancerous	Results		Uncomfortable	Embarrassing	Worrisome		Better	Results	Quicker
30-44	Female	USA	New Pap smear	No		25,000 to 49,999	Mountain	Android Phone / Tablet		Scaary	what	Why		Eeww	What	Why		What	How	Why		Necessary	Good	Helpful		Sure	Ok	New
30-44	Female	USA	New Pap smear	No		75,000 to 99,999	South Atlantic	Windows Desktop / Laptop		Gardasil	youth	great		Gardasil	youth	preventative		colpo	$ racket	cervical cancer		standard	need more than every 5 years	eek		false positives	too many Colpos	not everyone has HPV!
18-29	Female	USA	New Pap smear	No		0 to 9,999	New England	Android Phone / Tablet		Bullshit	Poison	Toxic		Bullshit	Internal organs	Lies		Std	Aids	Preventable		Q tip	My grandpa	Cream		New	Pap	Smear
18-29	Female	USA	HPV test	No		50,000 to 74,999	South Atlantic	iOS Phone / Tablet		Painful	Seizures	Scary		Interesting	Scary	Painful		Positive	Cancer	Shot		Uncomfortable	Necessary	Women's health		Necessary	Yearly	Same
18-29	Female	USA	New Pap smear	Yes		25,000 to 49,999	Middle Atlantic	iOS Phone / Tablet		Good	Necessary	Doctor		Good	Need	Relief		Scary	Pap smear	Biopsy		Painful	Nervous	Uncomfortable		Interested	Question	Doctor
30-44	Female	USA	New Pap smear	No		75,000 to 99,999	East North Central	Android Phone / Tablet		Unnecessary	Costly	Disease		Prepare	Prevent	Unnecessary		Sex	Teens	Disease		Uncomfortable	Necessary	Inconvenient		New	Inconvenient	Uncomfortable
18-29	Female	USA	New Pap smear	No		10,000 to 24,999	East North Central	Windows Desktop / Laptop		painful	questionable	controversial		unheard of	misleading	FALSE		warts	cancer	sex		safe	screening	painful		doctor	screening	uncomfortable
30-44	Female	AUS	New Pap smear	No		0 to 29,999	South Australia	Other		Modern	New	Updated		Good idea	Modern	New		Modern	Important	New		Embarrassing	Necessary	Needed		Curious	Current	New
30-44	Female	USA	HPV test	Yes		100,000 to 124,999	West North Central	Android Phone / Tablet		Skeptical	New	More research		Skeptical	New	Need more research		Good	Better Results	Easier		Gross	Uncomfortable	Nasty		To new	Innovative	Optimistic
30-44	Female	AUS	New Pap smear	No		Prefer not to answer	New South Wales	iOS Phone / Tablet		Pre cancer	Early detection	Abnormal cells		Unavailable to me	Fabulous incentive	Wish I could get it		Early detection	Life saving	Protection		Protection	Early detection	Necessity		Cervical cancer	Early detection	Changes in cells
45-59	Female	AUS	New Pap smear	No		60,000 to 89,999	Queensland	Windows Desktop / Laptop		great	scientific	advancment		the	same	thing		for	active	women		the	old	way		for	all	women
18-29	Female	USA	New Pap smear	Yes		10,000 to 24,999	West South Central	Windows Desktop / Laptop		aids	std	yeast infection		sick	cancer	sex		sex	nasty	dirty		check up	sexural active	std		std free	sexural active	clean
18-29	Female	USA	New Pap smear	No		Prefer not to answer	South Atlantic	iOS Phone / Tablet		Cervical	Cancer	Important		Transmission	Cancer	Prevention		Cancer	Important	Prevention		Invasive	Neccesary	Important		Invasive	Neccesary	Important
30-44	Female	USA	New Pap smear	Yes		25,000 to 49,999	Pacific	Android Phone / Tablet		shot	efficacy	doctor		injection	allergy	recommendations		cancer	gynecologist	speculum		OB/GYN	stirrups	swab		doctor	health	lab tests
18-29	Female	AUS	New Pap smear	No		Prefer not to answer	New South Wales	Windows Desktop / Laptop		don't know	don't know	don't know		don't know	don't know	don't know		don't know	don't know	don't know		don't know	don't know	don't know		don't know	don't know	don't know
30-44	Female	USA	HPV test	No		175,000 to 199,999	South Atlantic	Windows Desktop / Laptop		immunization	3shots	teenage		teenage	girl	immunization		screen	sexual	transmitted		hpv	cancer	test		improved	early	detection
30-44	Female	USA	HPV test	No		50,000 to 74,999	South Atlantic	Windows Desktop / Laptop		n/a	n/a	n/a		n/a	n/a	n/a		n/a	n/a	n/a		n/a	n/a	n/a		n/a	n/a	n/a
60+	Female	AUS	HPV test	Yes		30,000 to 59,999	Queensland	iOS Phone / Tablet		Preventative	Easy	Young people		Preventative	Easy	Young people		Early warning	Easy	Expensive		Annual	Bulk billed	Quick		New	Untested	Expensive
45-59	Female	AUS	New Pap smear	No		Prefer not to answer	Victoria	iOS Phone / Tablet		Girls	New	Prevention		Effectiveness	Necessary	Breast		Screening	Prevention	Cancer		Necessary	Appointment	Routine		Prevention	Cancer	Appointment
30-44	Female	USA	New Pap smear	Yes		75,000 to 99,999	East North Central	iOS Phone / Tablet		Preventative	Unnecessary	Confusing		Unfamiliar	Questionable	Unnecessary		Confusing	Necessary	Unfamiliar		Routine	Uncomfortable	Reassurance		Familiar	Improved	Advanced
45-59	Female	AUS	New Pap smear	No			Queensland	iOS Phone / Tablet		HIV	Unsure	What		Required	Women	Prevention		Dogs	Smear	Test		Cervical	Cancer	Prevention		Really	Whats	New
30-44	Female	USA	New Pap smear	No		Prefer not to answer	West South Central	iOS Phone / Tablet		No	No	No		No	No	No		No	No	No		Maybe	Maybe	Maybr		Maybe	Maybe	Maybe
45-59	Female	AUS	New Pap smear	Yes		30,000 to 59,999	Queensland	MacOS Desktop / Laptop		gardisil	virus	cervix		gardisil	hpv	pap		blood	cervix	vaccination		cervix	cells	hpv		cervix	hpv	cells
30-44	Female	USA	New Pap smear	No		Prefer not to answer	Pacific	Windows Desktop / Laptop		new	experimental	side effects		New	Experimental	side effects		yearly	safe	reliable		yearly	routine	reliable		routine	yearly	reliable
30-44	Female	USA	New Pap smear	No		10,000 to 24,999	East North Central	iOS Phone / Tablet		Cancer	Diease	Problem		Free from cancer	Problem	Helpful		Preventive	Problem	Helpful		Cancer	Smmothier	Easier		Cancer free	Smoother	Easier
30-44	Female	AUS	HPV test	No		Prefer not to answer	New South Wales	iOS Phone / Tablet		Needle	High school	Cancer		Needle	Pap	Smear		Needle	Cervical	Cancer		Hate	Uncomfortable	Gross		Awful	Uncomfortable	Hate
18-29	Female	USA	New Pap smear	No		Prefer not to answer	South Atlantic	iOS Phone / Tablet		Health	Shot	Std		Innovative	Testing	Cervix		Std	Fatal	Important		Health	Cervix	Instrument		Innovative	Health	Cervix
30-44	Female	USA	HPV test	Yes		100,000 to 124,999	Mountain	iOS Phone / Tablet		Useful	Critical	Necessary		Not	Entirely	Accurate		Helpful	Preventative	Good		Necessary	Cold	Annoyinh		Marketing	Advertising	Helpful?
18-29	Female	USA	New Pap smear	No		50,000 to 74,999	South Atlantic	Windows Desktop / Laptop		silly	ouch	viruses		imaginary	painful	cancer		smear	youth	strains		cervix	cancer	painful		accurate	predict	painful
30-44	Female	USA	New Pap smear	No		Prefer not to answer	New England	MacOS Desktop / Laptop		health	protection	teenager		science	health	progress		disease	caution	laboratory		ordinary	routine	health		vagina	vagina	vagina
30-44	Female	AUS	New Pap smear	Yes		Prefer not to answer	New South Wales	iOS Phone / Tablet		Cervical cancer	Questionable and concerns	Recommended		Side effects concerns	Questionable effectiveness	Recommended		Cervical	Cancer	Vaccine		Awkward	Necessary	Detection		Necessary	Detection	Awkward
18-29	Female	USA	New Pap smear	Yes		0 to 9,999	Pacific	Android Phone / Tablet		Brilliant	Necessary	Hope		Timely	Important	Practical		Lifesaver	Helpful	Scary		Uncomfortable	Awkward	Necessary		Gross	Interesting	Necessary
30-44	Female	USA	HPV test	No		Prefer not to answer	Pacific	Other		prevent	disease	human		vccine	cervical	cancer		sex	dunno	dunno		pap	smear	vaccine		i	don't	know
18-29	Female	USA	New Pap smear	No		125,000 to 149,999	East South Central	iOS Phone / Tablet		Shot	Doctor	Disease		Safety	Prevent	Dose		Screening	New	Needed		Gyno	Stirrups	Gown		Appointment	Different	Vagina
18-29	Female	USA	New Pap smear	No		0 to 9,999	South Atlantic	Android Phone / Tablet		Misunderstood	Good	Beneficial		Gardisil	Good	Beneficial		Not sure	Not sure	Not sure		Scary	Intrusive	Agonizing		Scary	Intrusive	Agonizing
18-29	Female	USA	New Pap smear	No		25,000 to 49,999	Middle Atlantic	Android Phone / Tablet		Prevention	Shot	Future		Cancer	Chemo	Nauseous		Sickness	Diagnosis	Doctor visits		Vigina	Stick	Smear		Prevention	Better test	Hope
18-29	Female	USA	New Pap smear	Yes		100,000 to 124,999	South Atlantic	Windows Desktop / Laptop		healing	good	medical		healing	help	good		new	cutting edge	medical		preventative	uncomfortable	medical		medical	cancer	new
30-44	Female	AUS	New Pap smear	No		0 to 29,999	Western Australia	Android Phone / Tablet		needle	arm	sore		needle	arm	sting		simple	doctor	relevant		embarrassing	uncomfortable	necessary		necessary	effective	quick
30-44	Female	USA	New Pap smear	No		25,000 to 49,999	South Atlantic	Windows Desktop / Laptop		cancer	health	prevent		health	prevention	technology		precaution	health	diagnosis		unconmfortable	prevent	check		technology	diagnosis	health
18-29	Female	USA	New Pap smear	Yes		100,000 to 124,999	New England	iOS Phone / Tablet		pain	shot	cure		cure	treatment	pain		virus	exam	treatment		embarrassing	cancer	doctor		better	improved	same
30-44	Female	USA	HPV test	Yes		25,000 to 49,999	West South Central	iOS Phone / Tablet		Prevention	Health	Std		Prevention	Health	Std		Std	Prevention	Annually		Prevention	Yearly	Health		Vaginal	Doctor	Prevention
30-44	Female	USA	New Pap smear	No		10,000 to 24,999	East South Central	iOS Phone / Tablet		Im	Too	Old		No	Family	History		At	Low	Risk		Alreadt	Answered	These		Once	A	Year
18-29	Female	USA	New Pap smear	No		10,000 to 24,999	West North Central	Android Phone / Tablet		Helpful	Needed	Ouch		New	Needed	Questions		Disease	Vaccination	Preventable		Scraping	Normal	Routine		New	Painful	Scraping
30-44	Female	USA	New Pap smear	No		50,000 to 74,999	Middle Atlantic	Android Phone / Tablet		needle	doctor	vaccine		needle	cancer	treatment		std	cancer	doctor		test	doctor	cancer		test	cancer	speculum
30-44	Female	USA	HPV test	Yes		50,000 to 74,999	Mountain	iOS Phone / Tablet		Necessary	Crucial	Invaluable		Necessary	Crucial	Invaluable		Necessary	Crucial	Invaluable		Necessary	Crucial	Invaluable		Convenient	Helpful	Easy
30-44	Female	USA	New Pap smear	No		50,000 to 74,999	South Atlantic	Windows Desktop / Laptop		FISH	COS	VBIRD		SHOT	NEEDLE	OUCH		BIRD	FISH	COW		BIRD	FISH	COW		FISH	BIRD	COW
18-29	Female	USA	New Pap smear	Yes		75,000 to 99,999	Pacific	Windows Desktop / Laptop		virgin	gardasil	needle		teenager	girl	needle		smear	prevention	routine		smear	nurse	preventrion		prevention	smear	hpv
18-29	Female	USA	New Pap smear	No		25,000 to 49,999	Mountain	Windows Desktop / Laptop		++++++++easier	prevention	std		good	prevention	health		health	good	disease		annoying	necessary	prevention		uncomfortable	important	health
18-29	Female	AUS	HPV test	No		0 to 29,999	Victoria	iOS Phone / Tablet		HPY	Vaccination	HPY		Cancer	Cervical	Vaccination		Human	Papilloma	Virus		Pap	Smear	Pap		Ok	Difference	New
30-44	Female	AUS	New Pap smear	No		90,000 to 119,999	Victoria	Windows Desktop / Laptop		needle	unknown	unclear		needle	immunisation	necessary		unknown	unclear	test		doctor	uncomfortable	necessary		unknown	unclear	doctor
18-29	Female	USA	New Pap smear	No		0 to 9,999	Middle Atlantic	iOS Phone / Tablet		Shots	Sting	Done		Needles	Three	Chance		Warts	Hidden	Spread		Tools	Cold	Metal		Questions	Normal	Abnormal
18-29	Female	AUS	HPV test	Yes		60,000 to 89,999	Victoria	iOS Phone / Tablet		Good	Once	Necessary		Virgin	Good	Preventative		Cancer	Better	Less often		Uncomfortable	Necessary	Yearly		Good	Less often	Better
18-29	Female	USA	New Pap smear	Yes		50,000 to 74,999	East South Central	Android Phone / Tablet		Unsafe	Untested	Questionable		Unsafe	Questionable	Optional		Important	Safe	Screening		Uncomfortable	Necessary	Annual		New	Potential	Modern
18-29	Female	USA	New Pap smear	No		0 to 9,999	Pacific	Android Phone / Tablet		3	Painful	Effective		3	Painful	Effective		Cervical	Cancer	Sexual		Important	Convenient	Uncomfortable		Hopeful	Effective	Earlier
30-44	Female	USA	New Pap smear	Yes		50,000 to 74,999	Pacific	MacOS Desktop / Laptop		new	edgy	expensive		costly	unrecommended	protection		unrealistic	edgy	expensive		unreliable	annoying	cheap		vital	cheap	protection
30-44	Female	AUS	New Pap smear	No		30,000 to 59,999	Victoria	iOS Phone / Tablet		unsure	what is it?	don't know what it is		what is it?	how do I get more information?	Do I need it?		no idea	don't know what it is	what is it?		uncomfortable	necessary	biennial		unsure	don't know	no information
30-44	Female	AUS	HPV test	Yes		90,000 to 119,999	Queensland	iOS Phone / Tablet		Important	Painful	Necessary		Necessary	Needle	Great		Unsure	Complicated	Effectiveness?		Uncomfortable	Important	Awkward		Confusing	Boring	Unsure
18-29	Female	AUS	HPV test	Yes		0 to 29,999	New South Wales	MacOS Desktop / Laptop		safe	must	girl		girl	compulsive	good		vital	men	woman		girl	cervix	cancer		i	dont	know
30-44	Female	USA	HPV test	Yes		0 to 9,999	East North Central	Windows Desktop / Laptop		prevent	strains	polyups		prevent	uterus	cervix		swab	new	polyup		swab	uncomfortable	tongs		swab	clean	doctor
30-44	Female	USA	New Pap smear	No		25,000 to 49,999	South Atlantic	iOS Phone / Tablet		Painful	Important	Needle		Really?	What is it	Strange		Catching	Strange	What is it		Female	Important	Test		Uncomfortabke	Female	Gynae
18-29	Female	AUS	HPV test	No		0 to 29,999	Tasmania	iOS Phone / Tablet		Needle	Good	Year 6		Grade 6	Chicken pox	Vaccine		Doctor	Pap smear	Vagina		Weird	Vagina	Mum		Same	HPV test	Smear
18-29	Female	USA	New Pap smear	No		0 to 9,999	Mountain	Windows Desktop / Laptop		needle	blood	Medication		needle	blood	Clear		danger	oh	ok		clean	Blood	Good		pain	Swab	Results
30-44	Female	USA	New Pap smear	No		150,000 to 174,999	West North Central	iOS Phone / Tablet		Std	Immunization	Unknown		New	Scary	Untrustworthy		Routine	Young adults	Sexually active		Yearly	Preventitive	Regular		Yearly	Test	Vagina
18-29	Female	AUS	HPV test	No		180,000 or more	Victoria	iOS Phone / Tablet		Needle	Preventative	Doctor		Protection	Good	Important		Unsure	Doctor	Sex		Vagina	Doctor	Chair		Better	Modern	Safer
30-44	Female	USA	HPV test	Yes		50,000 to 74,999	West South Central	Windows Desktop / Laptop		preventative	pap smear	shot		shot	preventative	positive		preventative	identification	pap smear		vaginal	cervix	health		cervical exam	scapula	vaginal
18-29	Female	USA	HPV test	No		10,000 to 24,999	East North Central	MacOS Desktop / Laptop		STD	necessary for all sexually active women	received in high school		necessary	preventative	shot?		STD test	necessary	gotten when young		painful	awkward	necessary		probably still awkward	painful	better than old Pap smear
30-44	Female	USA	New Pap smear	No		0 to 9,999	East North Central	Windows Desktop / Laptop		shot	female	12		preventiable	hope	cancer		shot	cancer	female		hurt	pinch	help		cold	hurt	run
30-44	Female	USA	New Pap smear	Yes		25,000 to 49,999	East North Central	Android Phone / Tablet		whore	std	gross		shot	std	pain		cautious	prepared	smart		routine	normal	smart		ok	better	good
30-44	Female	AUS	New Pap smear	No		180,000 or more	Victoria	Android Phone / Tablet		Cancer	Invasive	Preventative		Preventative	Unavailable	Age		Invasive	Preventative	Uncomfortable		Invasive	Preventative	Uncomfortable		Invasive	Preventative	Uncomfortable
18-29	Female	AUS	HPV test	No		30,000 to 59,999	Australian Capital Territory	Android Phone / Tablet		needle	sick	pain		needle	pain	sick		HIV	discomfort	pain		papaya	pain	discomfort		unknown	discomfort	pain
30-44	Female	USA	New Pap smear	Yes		100,000 to 124,999	South Atlantic	iOS Phone / Tablet		Improvement	Important	Good		Amazing	Necessary	Finally		Important	Necessary	Needed		Necessary	Important	Yuck		Improvement	Necessary	Advancement
30-44	Female	USA	New Pap smear	Yes		150,000 to 174,999	New England	Windows Desktop / Laptop		shot	gyno	pap smear		HPV	shot	doctor		sexually transmitted	pap smear	vaccination		uncomfortable	gyno	dreadful		gyno	abnormal cells	test
30-44	Female	USA	New Pap smear	Yes		100,000 to 124,999	New England	MacOS Desktop / Laptop		girls	cancer	cervix		young	girls	shot		cervical	cancer	vaccine		uncomfortable	doctor	stirrups		speculum	doctor	test
30-44	Female	USA	HPV test	Yes		25,000 to 49,999	West South Central	Android Phone / Tablet		Complications	Infertility	Fear		Unrealistic	Unsure	Skeptical		Qtip	Teens	Infertility		Stirrup	Clicking	Pain		Innovation	Hope	Prevention
18-29	Female	USA	HPV test	No		100,000 to 124,999	South Atlantic	iOS Phone / Tablet		pediatrician	before college	MMR measels mumps n rubella		Physician	gynecologist	HPV		blood test	doctor	lab		gynecologist	stirrups	?		safer	cervical cancer	?
30-44	Female	USA	New Pap smear	No		25,000 to 49,999	Pacific	iOS Phone / Tablet		Shot	Disease	Treatment		Shot	Cancer	Treatment		Virus	Shot	Test		Old	Women	Test		Modern	Prevention	Women
30-44	Female	AUS	New Pap smear	Yes		0 to 29,999	South Australia	Android Phone / Tablet		Concern	Wary	Worried		Wanted	Desired	Welcome		Unsure	Needed	Neccessity		Dislike	Must..do	Lifesaver		Safer	Hopeful	Promising
30-44	Female	USA	New Pap smear	No		50,000 to 74,999	Mountain	iOS Phone / Tablet		Lawsuit	Teenager	Billboard		Untrue	Unbelivable	Scam		Scam	Shot	Lawsuit		Grosd	Yuck	Run		Tricky	Salesman	Yuck
30-44	Female	AUS	New Pap smear	No		0 to 29,999	Queensland	Android Phone / Tablet		unknown	dk	?		cancer	female	prevention		STD	illness	sickness		ouch	painfull	humilating		cold	painfull	doctor
30-44	Female	AUS	New Pap smear	Yes		30,000 to 59,999	Western Australia	Android Phone / Tablet		Good	undecided	prevention		prevention	undecided	good		good	prevention	undecided		doctor	woman	prevention		prevention	good	like
18-29	Female	USA	HPV test	Yes		Prefer not to answer	Middle Atlantic	MacOS Desktop / Laptop		grey	sharp	virus		pain	sickness	cell		grey	pink	chair		q-tip	pink	discomfort		spread	pink	pressure
30-44	Female	USA	New Pap smear	No		50,000 to 74,999		iOS Phone / Tablet		Safe	Effective	Young		Age	Diagnosis	Prevents		Safe	Affective	Affordable		Regular	Normal	Fast		Safe	Affective	Affordable
30-44	Female	USA	New Pap smear	No		100,000 to 124,999	Mountain	Android Phone / Tablet		easy	done	already		hopefully	only	once		sounds	scary	now		yearly	necessary	easy		sounds	real	good
30-44	Female	USA	New Pap smear	No		75,000 to 99,999	Mountain	Android Phone / Tablet		healthy	safe	young women		safety	healthy	painless		young women	safety	health		uncomfortable	annual	Gross		painless	quick	easy
30-44	Female	AUS	New Pap smear	No		180,000 or more	New South Wales	iOS Phone / Tablet		Painful	Needle	No		Pain	Discomfort	Scary		Unfamiliar	Unclear	Confusing		Uncomfortable	Necessary	Safe		Familiar	Better	Safe
30-44	Female	AUS	New Pap smear	No		Prefer not to answer	Victoria	MacOS Desktop / Laptop		innocuous	acronym	simple		injection	prevention	advanced		std	check	warts		cringe	inconvenient	necessary		better	easier	quicker
18-29	Female	AUS	New Pap smear	No		120,000 to 149,999	Queensland	iOS Phone / Tablet		Expensive	Unknown	Dunno		Expensive	Silly	Dunno		Awkward	Okay	Annoying		Awkward	Annoying	Okay		Good	Awkward	Helpful
18-29	Female	USA	New Pap smear	No		10,000 to 24,999	West North Central	Windows Desktop / Laptop		HPV Vac	Vaccination H	Human papoplona Virus Vaccination		CCV	Cervical Cancer Vac	Vaccination CC		Human papilloma Virus test	HPV Test	Hpv Virus test		P smear	Smear Test	Pap test		Pap Smear	Smear Test	Pap Test
18-29	Female	USA	New Pap smear	Yes		100,000 to 124,999	South Atlantic	iOS Phone / Tablet		Unisex	Encouraged	Cancer		Gardisil	Hpv	Unisex		Cervical	Warts	Unisex		Prevention	Early	Annual		Prevention	Cancer	Early
18-29	Female	USA	HPV test	Yes		75,000 to 99,999	East North Central	Android Phone / Tablet		Useful	Effective	Stigmatized		Great	Stigmatized	Revolutionary		New	Useful	Misunderstood		Schmear	Ew	Good		New	Useful	Overdiagnosis
30-44	Female	AUS	New Pap smear	No		60,000 to 89,999	New South Wales	Windows Desktop / Laptop		cervical vacination	useful	specially for women		good for above 30 women	usefull	save the date		good to know what it is	need advice of gp	ask about this vacination		preventable	it has vacinations	good to know what is pap smear		curable	regular checkups	update
18-29	Female	AUS	New Pap smear	Yes		Prefer not to answer	New South Wales	Windows Desktop / Laptop		prevention	needle	mandatory		needle	cancer	prevention		doctor	vagina	cervix		std	prevention	detection		prevention	cancer	early detection
18-29	Female	USA	New Pap smear	No		10,000 to 24,999	East South Central	MacOS Desktop / Laptop		GivenTooEarly	Risks	Ouch		Ouch	Pain	Needles		Screening	Cervical	Cancer		Outdated	Unreliable	Negative		Updated	Helpful	Positive
18-29	Female	USA	HPV test	No		100,000 to 124,999	East South Central	iOS Phone / Tablet		Necesity	Yearly	Important		Need	Once a year	Important		Necesity	Yearly	Important		Necesity	Important	Yearly		Unknown	Doctor	Research
18-29	Female	USA	New Pap smear	No		25,000 to 49,999	Middle Atlantic	Windows Desktop / Laptop		how	needle	hmm		vaccine	suspicion	investigate		how?	needle	pain		blood	vagina	discomfort		vagina	discomfort	questions
18-29	Female	USA	New Pap smear	Yes		25,000 to 49,999	East North Central	iOS Phone / Tablet		Gardasil	Shot	Doctor		Gardasil	Shot	Young		Cancer	Cells	STD		Gynecologist	Stirrups	Cancer		Detection	Better	Cancer
30-44	Female	AUS	New Pap smear	No		0 to 29,999	South Australia	Android Phone / Tablet		Easy	Helpful	Better		Painful	Save lives	Better		Easy	Hopefully	Protection		Painful	Uncomfortable	Cold		Can't wait to see	Less painful	Better
18-29	Female	USA	New Pap smear	Yes		75,000 to 99,999	Pacific	iOS Phone / Tablet		Brilliant	Needed	Important		Important	Brilliant	Needed		Promising	Doable	Innovative		Regular	What I do	Yearly		Great	Exciting	Safe
18-29	Female	AUS	New Pap smear	No		Prefer not to answer	Queensland	Android Phone / Tablet		.	.	.		Cervix	Needles	Good		Don't know the difference	Never had a test	More info		Don't know the difference	More info	What are all these things		Invasive	Embarrassing	Modest
30-44	Female	AUS	HPV test	No		90,000 to 119,999	New South Wales	Windows Desktop / Laptop		health	fitness	screen		screen	body	health		important	years	germ		invasive	sore	over		current	caps	test
18-29	Female	USA	New Pap smear	Yes		25,000 to 49,999	East South Central	iOS Phone / Tablet		Wrong	Dangerous	Regret		Ineffective	Risky	Cancerous		Safe	Good	Preventative		Good	Healthy	Safe		Interesting	Medical	Safety
18-29	Female	AUS	HPV test	No		30,000 to 59,999	Queensland	Android Phone / Tablet		Needles	Pain	Important		Needles	Pain	Important		Important	Ouch	Confusing		Uncomfortable	Awkward	Needed		Uncomfortable	Awkward	Important
18-29	Female	USA	HPV test	No		100,000 to 124,999	South Atlantic	iOS Phone / Tablet		Impressive	Life	Saving		Safe	Prevention	Help		Precautionary	Protective	Good		Old	Out-dated	Inaccurate		New	Cautionary	Informatice
18-29	Female	USA	New Pap smear	Yes		10,000 to 24,999	Middle Atlantic	Windows Desktop / Laptop		protection	bad	disease		protection	side effects	untrustable		disease	test	vagina		sex	vagina	test		test	vagina	medical results
18-29	Female	AUS	New Pap smear	Yes		Prefer not to answer	Victoria	iOS Phone / Tablet		???	???	???		Recommended	School	Good		Unknown	???	New		Uncomfortable	Invasive	Up to date		Invasive	Uncomfortable	Necessary
18-29	Female	USA	New Pap smear	No		Prefer not to answer	Pacific	Android Phone / Tablet		Hurts	Need	Get		Get	Need	Safe		Need	Necessary	Get		Get	Health	Uncomfortable		Good	Efficient	Get
18-29	Female	USA	New Pap smear	No		100,000 to 124,999	Pacific	Windows Desktop / Laptop		interesting	protect	helpful		interesting	questions	detect		test	detect	early		test	detect	protect		helpful	detect	identify
18-29	Female	USA	New Pap smear	No		25,000 to 49,999	East North Central	iOS Phone / Tablet		Familiar	Already had it	Important		Unfamiliar	Is it the same as the hpv vaccine	New		Unfamiliar	New	Unknown		Common	Routine	Helpful		Innovative	Interesting	Helpful
18-29	Female	USA	New Pap smear	Yes		50,000 to 74,999	West North Central	iOS Phone / Tablet		?	?	?		?	?	Good		?	?	?		?	?	?		?	?	?
30-44	Female	AUS	New Pap smear	No		0 to 29,999	New South Wales	iOS Phone / Tablet		Necessary	Prevent	What		Mandatory	Relevant	Scary		What	Scary	Necessary		Ouch	Brush	Rough		Necessary	Ouch	What
18-29	Female	USA	HPV test	No		25,000 to 49,999	New England	iOS Phone / Tablet		Prevention	Health	Needle		Awesome	Needle	Health		Vagina	STI	Silent		Stirrups	Invasion	Pain		Better	Stirrup	Pain?
18-29	Female	USA	New Pap smear	Yes		75,000 to 99,999	New England	MacOS Desktop / Laptop		cancer	STD	prevention		women	STD	immunization		prevention	testing	women		testing	prevention	women		better	faster	cancer
18-29	Female	USA	New Pap smear	No		0 to 9,999	East North Central	Android Phone / Tablet		prevent	clear	safe		pelvic	bad	help		person	disease	illness		check	uncertain	certian		odd	check	rub
30-44	Female	AUS	New Pap smear	Yes		90,000 to 119,999	Australian Capital Territory	Android Phone / Tablet		beneficial	painful	uncertain		painful	uncomfortable	dreadful		beneficial	difficult	dread		painful	uncomfortable	unpleasant		unpleasant	painful	uncomfortable
18-29	Female	AUS	New Pap smear	No		30,000 to 59,999	Queensland	Android Phone / Tablet		Good	Easy	Doctor		Doctor	Easy	Once		Doctor	Needle	Worry		Cervix	Pain	Annual		New?	Doctor	Anxiety
30-44	Female	AUS	New Pap smear	No		90,000 to 119,999	Victoria	Windows Desktop / Laptop		pap	smear	test		injection	teenagers	remedy		pap	smear	test		pap	smear	test		new	pap	smear
18-29	Female	AUS	HPV test	No		Prefer not to answer	South Australia	Windows Desktop / Laptop		Good	Good	Good		Important	Lifesaving	Good		Good	Helpful	Good		Ouch	Important	Helpful		hi	hello	hey
18-29	Female	AUS	New Pap smear	No		30,000 to 59,999	Victoria	Android Phone / Tablet		Unsure	Needle	Vaccine		Gardisal	Painful	Mandatory		STI	Sex	Unwanted		Necessary	Painful	Cancer		Test	Speculum	Doctor
18-29	Female	AUS	HPV test	No		60,000 to 89,999	Victoria	MacOS Desktop / Laptop		jab	important	great		needle	high school	prevention		serious	medical	life saving		pain	uncomfortable	doctor		interesting	unknown	fear
30-44	Female	AUS	New Pap smear	Yes		60,000 to 89,999	Queensland	Windows Desktop / Laptop		protection	prevention	safe		reassurance	safe	protection		reassurance	uncomfortable	important		uncomfortable	inconvenient	reassurance		protection	confidence	uncomfortable
30-44	Female	AUS	HPV test	Yes		30,000 to 59,999	Western Australia	MacOS Desktop / Laptop		preventative	safe	effective		effective	preventation	safe		screening	prevention	effective		quick	embarassing	preventative		more effective	easy	quick
18-29	Female	AUS	HPV test	No		0 to 29,999	New South Wales	Windows Desktop / Laptop		Doctor	Uncomfortable	Money		Money	Doctor	Broke		Money	Doctor	Pointless		Doctor	Money	Uncomfortable		Old	Doctor	Money
18-29	Female	AUS	HPV test	No		30,000 to 59,999	Victoria	iOS Phone / Tablet		Prevention	Needle	Important		Good	Needle	Smear		Better	Imprtant	Quick		Test	Invasive	Ought		Better	Invasive	Good
18-29	Female	AUS	HPV test	Yes		150,000 to 179,999	New South Wales	Windows Desktop / Laptop		compulsory	effective	revolutionary		revolutionary	effective	compulsory		how	female	new		unpleasant	forgotten	necessary		unknown	new	untested
30-44	Female	AUS	HPV test	Yes		0 to 29,999	Queensland	Other		Necessary	Painful	Needed		Necessary	Free	Vital		Cervix	STD	Discomfort		Discomfort	Effective	Necessary		What's	The	Difference?
30-44	Female	AUS	HPV test	No		30,000 to 59,999	Australian Capital Territory	Android Phone / Tablet		Virus	Prevention	Vagina		Cancer	Prevention	Vagina		Virus	Prevention	Bad		Women	Doctor	Uncomfortable		Better	Vagina	Cancer
18-29	Female	AUS	New Pap smear	Yes		90,000 to 119,999	Queensland	iOS Phone / Tablet		Neccessay	Effective	Preventative		Useful	Health	Preventative		Doctor	Prevent	Early		Regular	Doctor	Uncomfortable		Doctor	Better	Routine
30-44	Female	AUS	New Pap smear	Yes		0 to 29,999	Western Australia	iOS Phone / Tablet		Choice of health	Protect cervical cancer	To support health		To protect cervical cancer	Support your health	Life safety		New test	Checking cervical cancer	Early test		Checking cervical cancer	Speculum vagina	Lab test		Better than current one	Checking cancer	The same pap smear
18-29	Female	AUS	New Pap smear	No		30,000 to 59,999	Victoria	iOS Phone / Tablet		Herpes	Test	Doctor		Easy	Necessary	Safe		Cancer	Test	Sex		Test	Doctor	Awkward		Doctor	Test	Cancer
30-44	Female	AUS	New Pap smear	No		0 to 29,999	Victoria	iOS Phone / Tablet		Needles	Tests	Doctors		Once	Needles	Vaccine		Virus	Sick	Unwell		3 years	Cancer	My mum		Doctors	Undressing	Over
30-44	Female	AUS	New Pap smear	Yes		90,000 to 119,999	Victoria	iOS Phone / Tablet		Is there one	Is it too late to get it if you already have HPV	How much does it cost		Important for women to have	Preventative	Painful		Never had it done	Important to have one done	Extra protection towards early signs of cancerous cells		Uncomfortable	Lifesaving	Precaution		Never heard of it	What is it	Can I have more info about it
18-29	Female	AUS	New Pap smear	No		0 to 29,999	Tasmania	Windows Desktop / Laptop		prevention	STI	virus		cancer	prevention	sexual		STI	vagina	doctor		vagina	cervical cancer	GP		effective	cervical cancer	detection
18-29	Female	AUS	New Pap smear	Yes		30,000 to 59,999	Victoria	Android Phone / Tablet		Shot	Immunisation	School		Safe	Hpv	Girls		Std	Warts	Doctor		Uncomfortable	Necessary	Doctor		Uncomfortable	Speculum	Doctor
30-44	Female	AUS	HPV test	No		90,000 to 119,999	New South Wales	Windows Desktop / Laptop		virus	std	cancer		test	death	needle		std	cancer	cells		scrape	painful	doctor		scrape	unsure	ambivalent
30-44	Female	AUS	New Pap smear	No		Prefer not to answer	Victoria	Windows Desktop / Laptop		less intrusive	less thorough	convenient		less intrusive	responsible	more convenient		same test as pap smear	embarrassing	inconvenient		painful	embarrassing	inconvenient		whats the difference between the new and old pap smear?	painful	embarassing
30-44	Female	AUS	New Pap smear	No		150,000 to 179,999	Australian Capital Territory	Android Phone / Tablet		Test	Immunity	Precaution		Precaution	Test	Vagina		Vagina	Test	Precaution		Vagina	Test	Uncomfortable		Test	Precaution	Vaginq
30-44	Female	AUS	New Pap smear	No		0 to 29,999	Queensland	Windows Desktop / Laptop		Preventative	All women should have it done	Inevasive		Inevasive	Prevents Cervical Cancer	Still need papsmears done		Unsure	Don't know about it	Not had one		Examination	Cervical Cancer	Advanced		Better	Faster	More Results
18-29	Female	AUS	HPV test	No		30,000 to 59,999	Victoria	iOS Phone / Tablet		Needle	Pap test	Doctor		Needle	Tubes	Cancer		Sick	Anxious	Tests		Doctor	Clean	Swab		Catious	Swab	Nervous
30-44	Female	AUS	HPV test	No		60,000 to 89,999	New South Wales	MacOS Desktop / Laptop		youth	daughter	hope		pap	regular	prevent		age	prevent	new		pain	awkward	due		confused	nervous	information
18-29	Female	AUS	New Pap smear	No		150,000 to 179,999	Victoria	iOS Phone / Tablet		Unsure	New	Girls		Injection	Girla	School		unsure	Uneducated	STD		Pain	Uncomfortable	Bleeding		Unaure	New	Uncomfortable
30-44	Female	AUS	New Pap smear	No		90,000 to 119,999	New South Wales	Windows Desktop / Laptop		had it	does it work	side-effects		under 26	had	does it work?		herpes	pap smear	std		uncomfortable	necessary	bearable		improved	uncomfortable	bearable
30-44	Female	AUS	New Pap smear	No		30,000 to 59,999	Victoria	MacOS Desktop / Laptop		early	important	curable		practical	important	necessary		preventable	vaccine	common		unpleasant	necessary	biannual		improved	important	improved
30-44	Female	AUS	New Pap smear	No		Prefer not to answer	Western Australia	iOS Phone / Tablet		Get vaccinated	New	Important		Vaginal test	New	To do		Better	Thorough	To do		Vagina	Every two years	Test		Better	Effective	Life saving
30-44	Female	AUS	HPV test	Yes		60,000 to 89,999	Western Australia	Android Phone / Tablet		not aware	need information	access		expensive	difficult	unsure		unaware	need information	new		uncomfortable	lifesaving	forget		new	not heard	information
30-44	Female	AUS	HPV test	Yes		90,000 to 119,999	New South Wales	Windows Desktop / Laptop		Cancer	Predict	Vaccine		Invasive	Private	Good		Screening	Cancer	Predict		STD	Vaccine	Cancer		Private	Invasive	Sex
30-44	Female	AUS	New Pap smear	Yes		90,000 to 119,999	Tasmania	Windows Desktop / Laptop		Prevention	Thankful	Innovation		Injection	Prevention	Breakthrough		Innovative	Breakthrough	Lucky		Cancer	Cervix	Examination		Helpful	Breakthrough	Lucky
30-44	Female	AUS	New Pap smear	No		180,000 or more	New South Wales	Windows Desktop / Laptop		Important	Young	Cancer		Important	young	health		Relevant	STD	Health		Regular	Uncomfortable	women		Modern	Technology	Health
18-29	Female	AUS	HPV test	Yes		Prefer not to answer	Victoria	Windows Desktop / Laptop		needle	solution	injection		needle	prevention	aid		smear	prevention	uncomfortable		test	woman	2years		research	uncomfortable	smear
30-44	Female	AUS	New Pap smear	No		180,000 or more	South Australia	Windows Desktop / Laptop		unknown	unknown	unknown		unproven	unclear	unsure		unknown	unclear	misinterpreted		essential	easy	quick		unknown	unknown	unknown
18-29	Female	AUS	New Pap smear	No		30,000 to 59,999	Australian Capital Territory	Windows Desktop / Laptop		cancer	prevention	doctor		cancer	prevention	doctor		pap smear	doctor	cancer		doctor	vagina	cancer		doctor	vagina	cancer
18-29	Female	AUS	New Pap smear	No		Prefer not to answer	New South Wales	Windows Desktop / Laptop		prevention	health	needle		women	prevention	health		doctor	screening	women		doctors	regular	prevention		doctor	health	screening
30-44	Female	AUS	HPV test	No		90,000 to 119,999	South Australia	Windows Desktop / Laptop		surprise	what is it	never heard		surprise	interesting	want one		better than PAP	more acurate	examination		cancer	examination	not comfortable		better results	cancer	prevention
18-29	Female	AUS	HPV test	Yes		30,000 to 59,999	Victoria	Windows Desktop / Laptop		cervical	needles	doctor		three	school	HPV		sex	cancer	risk		health	HPV	cancer		doctor	test	vagina
30-44	Female	AUS	New Pap smear	Yes		Prefer not to answer	Australian Capital Territory	Windows Desktop / Laptop		prevention	unnessary	medical		medical	needed	necessary		hesitation	fear	guilt		embarrassment	inconvenience	obligation		inconvenience	embarrassment	unconfortable
30-44	Female	AUS	New Pap smear	Yes		60,000 to 89,999	Queensland	Windows Desktop / Laptop		lifesaving	useful	great		useful	great	lifesaving		useful	good	must		ouch	painful	useful		useful	ouch	better
30-44	Female	AUS	HPV test	Yes		Prefer not to answer	Victoria	Windows Desktop / Laptop		Human	Papiloma	Virus		necessary	necessary	necessary		speculum	pre-cancersous	necessary		speculum	necessary	awkward		Pre-cancer	speculum	procedure
18-29	Female	AUS	HPV test	No		90,000 to 119,999	New South Wales	Windows Desktop / Laptop		prevention	cancer	doctor		prevention	cancer	important		cancer	detection	doctor		vagina	uncomfortable	doctor		detection	uncomfortable	doctor
30-44	Female	AUS	New Pap smear	Yes		60,000 to 89,999	New South Wales	Windows Desktop / Laptop		Educate	Important	Free		necessary	Life saving	Woman		Essential	Free	Educate		Uncomfortable	Important	Embarrassing		Uncomfortable	Important	Embarrassing
18-29	Female	AUS	New Pap smear	Yes		120,000 to 149,999	South Australia	Windows Desktop / Laptop		Gardasil	herpes	women		Gardasil	HPV	ouch		doctor	pap smear	uncomfortable		test	cervix	cancer		test	cervix	new
30-44	Female	AUS	HPV test	No		120,000 to 149,999	New South Wales	Windows Desktop / Laptop		preventative	great	simple		great	simple	precaution		awkward	necessary	precuation		awkward	necessary	precaution		Better	necessary	awkward
30-44	Female	AUS	New Pap smear	No		90,000 to 119,999	New South Wales	Windows Desktop / Laptop		Virus	Female	Needs to be cured		Prevention	Cancer	Women		Common	Women	Test		Check Up	Gyno	Yearly		Technology	Female	Getting in first
30-44	Female	AUS	New Pap smear	No		Prefer not to answer	South Australia	Windows Desktop / Laptop		injection	preventative	cancer		prevent	cancer	cervical		blood test	cancer	woman		lady	cancer	prevention		preventative	important	women
18-29	Female	AUS	New Pap smear	No		0 to 29,999	Queensland	Windows Desktop / Laptop		HUMAN	PAPPALOMA	VIRUS		PREVENT	DIAGNOSE	TREAT		VIRUS	CANCER	TEST		HPV	CERVICAL	TESTS		MODERN	BETTER	ADVANCED
30-44	Female	AUS	HPV test	Yes		0 to 29,999	South Australia	iOS Phone / Tablet		Protection	Better	Health		Protection	Health	Good idea		Virus	Examination	Cells		Check	Test	Results		Thorough	Better	Results
30-44	Female	AUS	New Pap smear	No		Prefer not to answer	Victoria	Windows Desktop / Laptop		doctor	test	vacination		medical	prevention	required		doctor	test	unknown		doctor	test	uncomfortable		test	doctor	advanced
30-44	Female	AUS	New Pap smear	No		30,000 to 59,999	Victoria	Windows Desktop / Laptop		h	p	d		c	c	v		h	c	d		p	a	p		p	a	s
18-29	Female	AUS	New Pap smear	Yes		90,000 to 119,999	Victoria	Windows Desktop / Laptop		Needle	Uncomfortable	Important		Painful	Necessary	Fainted		Pap Smear?	Necessary?	Unknown		Doctor	Two-years	Important		Better?	Necessary	Doctor
18-29	Female	AUS	HPV test	No		60,000 to 89,999	Queensland	Windows Desktop / Laptop		doctor	easier	needle		important	needle	doctor		important	doctor	virus		vagina	uncomfortable	personal		vagina	different	invasive
18-29	Female	AUS	New Pap smear	No		60,000 to 89,999	Australian Capital Territory	Windows Desktop / Laptop		Needed	Support	Sick		Needed	Helps	Heals		Sick	Bad	Doctor		Regular	Needed	Preventive		Unknown	Information	Question
30-44	Female	AUS	HPV test	Yes		60,000 to 89,999	New South Wales	Windows Desktop / Laptop		preventing	safe	lasting		preventing	recommended	lasting		quick	pain	reliable		quick	safe	necessary		reliable	safe	diagnostic
18-29	Female	AUS	New Pap smear	Yes		90,000 to 119,999	New South Wales	Windows Desktop / Laptop		virus	required	preventative		preventative	uncomfortable	required		avoidance	required	uncomfortable		uncomfortable	horrible	required		uncomfortable	different	better
30-44	Female	AUS	New Pap smear	No		90,000 to 119,999	New South Wales	Windows Desktop / Laptop		good	positive	improvement		hopeful	worthwile	prevention		unclear	unsure	important		unpleasant	important	necassary		unclear	why	different
30-44	Female	AUS	New Pap smear	Yes		0 to 29,999	Queensland	Windows Desktop / Laptop		good	do	it		deadly	serious	bad		good	early	require		easy	quick	doit		great	better	try
18-29	Female	AUS	HPV test	No		150,000 to 179,999	Tasmania	Windows Desktop / Laptop		needle	ongoing	booster		needle	two yearly	free		new test	regular	not common		easy	safe	available to all ages		new testing method	same process	necessary
30-44	Female	AUS	HPV test	Yes		Prefer not to answer	Victoria	Windows Desktop / Laptop		human	papilloma	virus		preventative	help self	curative		Human	Papilloma	virus		preventative	5 minutes	life saving		earlier notification	preventative	ease of mind
30-44	Female	AUS	New Pap smear	No		150,000 to 179,999	New South Wales	Windows Desktop / Laptop		Medical	expensive	ineffective		invasive	drugs	needle		HIV	dangerous	disease		breasts	women	elderly		Innovative	non-invasive	breasts
30-44	Female	AUS	New Pap smear	No		120,000 to 149,999	Victoria	Windows Desktop / Laptop		std	warts	disease		teenagers	immunisation	school		unknown	warts	stds		preventative	necessary	ok		better	same	difference?
18-29	Female	AUS	New Pap smear	No		120,000 to 149,999	Victoria	Windows Desktop / Laptop		unknown	prevent	resonable		easy	convenient	preventative		unsure	not well known	preventative		uncomfortable	preventative	embarrasing		uncomfortable	necessary	embarrassing
30-44	Female	AUS	New Pap smear	No		60,000 to 89,999	South Australia	iOS Phone / Tablet		Needle	Protect	Disease		Needle	Help	Cervix		Disease	Sex	Infect		Invasive	Check	Embarrassing		Invasive	Cancer	Awkward
30-44	Female	AUS	HPV test	No		150,000 to 179,999	Western Australia	iOS Phone / Tablet		Don't know what this is	Don't know	Don't. Know		I think I got this in high school	Not tested	Don't know		Don't know	Don't understand the difference	Important		Painful	2 years	Needed		Don't know	Don't understand the difference	Important
30-44	Female	AUS	New Pap smear	Yes		Prefer not to answer	Western Australia	Windows Desktop / Laptop		necessary	available	free		necessary	free	disease		virus	cancer	disease		uncomfortable	necessary	embarrassing		necessary	embarassing	disease
30-44	Female	AUS	New Pap smear	No		60,000 to 89,999	Queensland	Windows Desktop / Laptop		lifesafing	essential	safe		awesome	great	timimg		results	tests	lifesaving		safe	old	workds		greatr	lifesaving	innovative
18-29	Female	AUS	New Pap smear	No		150,000 to 179,999	New South Wales	Windows Desktop / Laptop		needle	herpes	school		doctor	needle	medical		sexually transmitted disease	herpes	vaccine		women	test	doctor		women	test	doctor
30-44	Female	AUS	New Pap smear	No		30,000 to 59,999	New South Wales	Windows Desktop / Laptop		human	papilloma	virus		is	there	one		prevent	cervical	cancer		every	four	years		vaginal	speculum	still
30-44	Female	AUS	New Pap smear	Yes		90,000 to 119,999	South Australia	Windows Desktop / Laptop		young	preventative	simple		young	preventative	simple		young	sexually	transmitted		cervical	cancer	important		cervical	cancer	effective
30-44	Female	AUS	HPV test	No		30,000 to 59,999	Queensland	Android Phone / Tablet		New	Unknown	Interested		Positive	Strong	Women		Fast	New	Modern		Annoying	Necessary	Prevention		Different	Easy	Encouraging
18-29	Female	AUS	New Pap smear	Yes		150,000 to 179,999	Victoria	Windows Desktop / Laptop		effective	cytology	needle		HPV	cytology	needle		strains	high risk	cytology		cells	spray	slide		cervical	cells	slide
18-29	Female	AUS	New Pap smear	No		90,000 to 119,999	Western Australia	Windows Desktop / Laptop		unsure	unsure	unsure		injection	needle	medicine		unsure	unsure	unsure		chore	uncomfortable	inconvienience		new?	inconvienient	chore
18-29	Female	AUS	New Pap smear	Yes		Prefer not to answer	Victoria	iOS Phone / Tablet		Boys	High school	Necessary		High school	Girls and boys	Important		Important	Gp	Free		Important	Uncomfortable	Gp		Uncomfortable	Gp	Important
30-44	Female	AUS	New Pap smear	No		150,000 to 179,999	Queensland	Windows Desktop / Laptop		prevention	uncertain	information needed		prevention	expensive	not sure if it works		test	painful	more info needed		examination	women	painful		same as old test	no change	the same thing
30-44	Female	AUS	New Pap smear	No		120,000 to 149,999	New South Wales	MacOS Desktop / Laptop		Life-saving	Breakthrough	Necessary		Save	Lives	Breakthrough		Life-saving	Breakthrough	Necessary		Life-saving	Breakthrough	Necessary		Improved	Life-saving	Advance
18-29	Female	AUS	New Pap smear	Yes		120,000 to 149,999	Queensland	iOS Phone / Tablet		Needle	Warts	Sex		Needle	Gardasil	Cervical cancer foundation		Warts	Doctor	HPV		Dr	Bed	Legs		Vagina	Different	Change
18-29	Female	AUS	New Pap smear	Yes		0 to 29,999	Queensland	Android Phone / Tablet		useful	life-saving	beneficial		life-saving	helpful	safe		uncomfortable	necessary	beneficial		uncomfortable	necessary	useful		uncomfortable	necessary	better
30-44	Female	AUS	HPV test	No		120,000 to 149,999	New South Wales	Android Phone / Tablet		needles	cancer	preventative		needle	cancer	preventative		cervical cancer	pap smear	speculum		painful	uncomfortable	2 yearly		unknown	not enough info	???
30-44	Female	AUS	HPV test	No		90,000 to 119,999	Western Australia	Windows Desktop / Laptop		protect	preventative	health		preventative	necessary	relief		unknown	necessary	health		necessary	awkward	health		same	awkward	necessary
30-44	Female	AUS	New Pap smear	No		60,000 to 89,999	New South Wales	iOS Phone / Tablet		Only	At risk	Individuals		Prevent	Cervical	Cancer		Sexually	Transmitted	Disease		Regular	Test	Essential		Regular	Test	Essential
18-29	Female	AUS	HPV test	Yes		0 to 29,999	Queensland	Windows Desktop / Laptop		needles	blue	terminology		cow	health	needle		HIV	test tube	mysterious		disgusting	gloves	wet		better	pappadums	oily
30-44	Female	AUS	New Pap smear	No		180,000 or more	Australian Capital Territory	Windows Desktop / Laptop		don't	know	this		easy	convenient	hope		not	sure	huh		old	gross	neccessary		sounds	good	dude
18-29	Female	AUS	New Pap smear	No		Prefer not to answer	South Australia	Windows Desktop / Laptop		confusion	what	not sure		essential	great	fantastic		confusion	what	not sure		quick	necessary	awkward		confusion	difference	better
30-44	Female	AUS	HPV test	No		30,000 to 59,999	Victoria	iOS Phone / Tablet		Vaccines	Papilloma	Cancer		Cancer	Cervical	Vaccine		Changes in cells	Genital warts	Cancer		Cells	Cervix	Doctors		New	Tests	More comfortable
18-29	Female	AUS	HPV test	Yes		60,000 to 89,999	New South Wales	MacOS Desktop / Laptop		vaccine	virus	injection		vaccine	cancer	too late		detect	routine	standard		uncomfortable	unpleasant	useful		confusing	unclear	whats the difference
18-29	Female	AUS	New Pap smear	No		180,000 or more	New South Wales	Windows Desktop / Laptop		voluntary	side effects	painfull		School	needle	works		Disease	HIV	Sex		Painfull	avoid	important		intrusive	painfull	important
30-44	Female	AUS	New Pap smear	No		60,000 to 89,999	Victoria	Android Phone / Tablet		efficacy	injection	why		possibility	life	vaginal		test	pre-cancer	death		invasive	uncomfortable	life-saving		better	treatment	chance
30-44	Female	AUS	New Pap smear	Yes		90,000 to 119,999	Queensland	Windows Desktop / Laptop		innovative	preventative	interesting		preventative	exciting	innovative		essential	discomfort	embarassing		discomfort	embarassing	preventative		discomfort	embarassing	essential
18-29	Female	AUS	New Pap smear	No		Prefer not to answer	Queensland	Windows Desktop / Laptop		doctors	uncomfortable	accuracy?		doctors	helpful	needles		donno	Never	Done		awkward	effort	unconfortable		exciting	painless?	method?
18-29	Female	AUS	New Pap smear	Yes		30,000 to 59,999	Victoria	Windows Desktop / Laptop		Healthy	Prevention	Long term		Prevention	Safety	Security		Confusion	Unsure	Anxious		Uncomfortable	Painful	Stressful		Uncomfortable	Cold	Painful
30-44	Female	AUS	New Pap smear	Yes		90,000 to 119,999	Victoria	Windows Desktop / Laptop		cevical	injection	prevention		prevention	injection	protection		human powered vehicle (school)	confusing	unsure		test	doctor	appointment		better	improved	updated
30-44	Female	AUS	New Pap smear	Yes		Prefer not to answer	Victoria	Android Phone / Tablet		needle	ouch	doctor		needle	injection	prevention		sick	doctor	test		doctor	vaginas	dont go there		doctor	dont go there	embarrassing
18-29	Female	AUS	New Pap smear	Yes		Prefer not to answer	New South Wales	MacOS Desktop / Laptop		Green	Disease	Warts		Pink	Painful	Sting		Wart	Preventable	Painful		Vagina	Private	Invasive		Sounds Gross	Vagina	Doctor
18-29	Female	AUS	New Pap smear	No		Prefer not to answer	New South Wales	MacOS Desktop / Laptop		smart	science	brilliant		great	goodidea	smart		smart	necessary	agiven		necessary	smart	painful		bright	smart	science
30-44	Female	AUS	HPV test	No		30,000 to 59,999	Queensland	iOS Phone / Tablet		Needles	Yes	Done		Cure	Doctor	Needles		Yes	Safe	Happy		No	Mortifying	Embarrassing		Embarrassing	Outdated	No
30-44	Female	AUS	HPV test	No		30,000 to 59,999	New South Wales	Windows Desktop / Laptop		Potential	Convenient	Easier		Uneffective?	Convenient	Easier		Easier	Convenient	Current		Uncomfortable	Out dated	Pointless		Uncomfortable	Impractical	Pointless
30-44	Female	AUS	HPV test	No		0 to 29,999	Victoria	iOS Phone / Tablet		Also need more infor	Quick	Easy		Need more info	Like any other needle	Okay		Quick	Easy	No biggie		Quick	Easy	No biggie		Also quick	Easy	Do it
18-29	Female	AUS	New Pap smear	Yes		0 to 29,999	Victoria	iOS Phone / Tablet		Needle	Health	Prevention		Female	Pap smear	Health		Disease	Pap smear	Doctor		Doctor	Examination	Cancer		Doctor	Examination	Cancer
18-29	Female	AUS	New Pap smear	No		60,000 to 89,999	South Australia	iOS Phone / Tablet		Needle	Germs	Gyno		Needle	Ouch	Health		Uncomfortable	Awkward	Pap		Doctors	Scary	Tests		New	Scary	Yuck
30-44	Female	AUS	HPV test	No		30,000 to 59,999	Western Australia	Windows Desktop / Laptop		Unknown	Doctor	Risky		Risky	Too old	Unnecessary		Unnecessary	Doctor	Sexually active		Doctor	Uncomfortable	Sexually active		Different	Improved	Invasive
30-44	Female	AUS	HPV test	No		0 to 29,999	New South Wales	Windows Desktop / Laptop		smart	essential	good		essential	smart	good		fast	new	ACCURATE		fast	accurate	a must		quicker	more effective	accurate
30-44	Female	AUS	New Pap smear	No		180,000 or more	Western Australia	Windows Desktop / Laptop		hepititis	cancer	cure		cancer	cure	women		Human	test	women		cancer	test	women		new	test	women
30-44	Female	AUS	New Pap smear	No		120,000 to 149,999	Victoria	iOS Phone / Tablet		Unsure	Unfair	Unknown		Unknown	Unfair	Hope		Unknown	What	Never heard of it		Invasive	Uncomfortable	Chore		New	Scary	Inaccurate
30-44	Female	AUS	New Pap smear	Yes		120,000 to 149,999	Queensland	Windows Desktop / Laptop		prevention	helpful	should be free to every female		Prevention	safety	should be free to all females		prevention	safety	should be free		prevention	uncomfortable	embarrassing		prevention	safety	unpleasant
30-44	Female	AUS	New Pap smear	No		0 to 29,999	Victoria	iOS Phone / Tablet		New	Technology	Curious		Happy	Sick	Technology		Wart	Good	Safe		Uncomfortable	Necessary	Two years		Efficient	Required	Safe
30-44	Female	AUS	New Pap smear	No		Prefer not to answer	New South Wales	iOS Phone / Tablet		Needle	Nothing	Nothing		Needle	Ouch	Young		Vagina	Smear	Ouch		Embaressing	Vagina	Naked		Ouch	Smear	Vagina
30-44	Female	AUS	New Pap smear	Yes		60,000 to 89,999	Victoria	iOS Phone / Tablet		not sure	not sure	not sure		not sure	not sure	not sure		not sure	not sure	not sure		none	none	not sure		not sure	none	not sure
30-44	Female	AUS	HPV test	Yes		180,000 or more	Queensland	iOS Phone / Tablet		Necessary	Preventable	Painfull		Necessary	Preventable	Fortunate		Necessary	Unfortunate	Preventable		Necessary	Vital	Uncomfortabl		Necesary	Preventable	Fortunate
18-29	Female	AUS	HPV test	Yes		150,000 to 179,999	Western Australia	iOS Phone / Tablet		Easy	Stressfree	Unisex		Weird	Strange	Confusing		Easy	Stressfree	Unisex		Woman	Sexual	Intimate		Female	Disturbing	Invasive
18-29	Female	AUS	New Pap smear	No		90,000 to 119,999	New South Wales	Windows Desktop / Laptop		virus	sickly	woman		safe	secure	fundamental		great	respect	necessary		vagina	doctor	cells		earlier detection	thorough	new
18-29	Female	AUS	New Pap smear	No		30,000 to 59,999	New South Wales	iOS Phone / Tablet		Necessary	annoying	same thing		Necessary	Annoying	unfair		Yuck	needed	stds		discomfort	Pain	gross		Ouch	yuck	uncomfortable
